# Supplementary material for: Identification of Genes Potentially Regulated by Human Polynucleotide Phosphorylase (hPNPaseold-35) Using Melanoma as a Model
Source: PLoS One. 2013 Oct 15;8(10):e76284. doi: 10.1371/journal.pone.0076284 (PMC3797080; doi:10.1371/journal.pone.0076284)
Supplement: Table S1 — Results for IPA biological functions (A), toxicity lists (B), canonical pathways (C) and most significant networks (D) associated with genes dysregulated as a result of hPNPaseold-35 depletion. (XLSX) [file pone.0076284.s011.xlsx]

## Sheet: S1a
Table S1a. Top biological functions associated with hPNPaseold-35 knockdown identified by IPA
Category	p-value	Molecules
Cell Death and Survival	3.92E-32-1.26E-03	RCAN1,CTDSPL,PRKCH,PPP2R1B,CCT2,BIN1,TXNIP,CLCN7,PRKAR1A,POLB,CDKN1A,PLA2G16,DDX17,HIPK2,TXNRD1,NFKBIA,MCAM,DPP8,RNF5,LGALS3,LUM,F3,PPARG,SLAMF7,FOSL1,JUND,PHKA2,ATG4B,EN2,NR4A2,CBX5,CREM,ABCG2,GSR,NDUFS1,CD9,AVEN,C3,HLA-B,HADHA,PPP2R1A,ITGB1,ID3,STK24,ABCE1,DNM2,PPIF,null,QARS,NAPA,CASP2,CLCN3,MAP2K2,TNNI3,UPF1,CKAP2,CEACAM5,BLCAP,UQCRFS1,CFLAR,IL12A,LRP8,VPS41,PDCD4,WAPAL,CDC25B,KPNA2,SLC20A1,F…
Cancer	1.21E-26-1.35E-03	CTDSPL,PPP2R1B,BIN1,CCT2,PRKAR1A,RPS6KC1,POLB,CDKN1A,SMTN,HIPK2,NFKBIA,MCAM,RNF5,PPARG,ATP5C1,NUP155,USP4,ATG4B,FBLN5,ABCG2,RPE,CD9,PPP2R1A,HLA-B,STK24,BRIP1,NETO2,DNM2,GBF1,ACTR2,CLCN3,CASP2,ASXL2,SLC17A5,TNNI3,FHOD3,CFLAR,IL12A,WDR1,NEIL3,LRP8,KPNA2,LACTB2,DBI,PTN,FGFR1OP,PLK3,EIF4A2,LAMA1,DHCR24,EIF2C2,TNFAIP3,SEC31A,ANK3,NR3C1,STX11,PRPF38B,BHLHE40,EEF1D,RPS11,WWTR1,SPTBN1,CCND3,HCCS,HLA-DRB4…
Cellular Growth and Proliferation	1.02E-25-1.31E-03	S100A13,RCAN1,PRKCH,CTDSPL,PPP2R1B,BIN1,CCT2,TXNIP,CREG1,CLCN7,PRKAR1A,ETFB,CDKN1A,PLA2G16,DDX17,HIPK2,TXNRD1,NFKBIA,MCAM,RNF5,ERBB2IP,CRLF3,LGALS3,F3,LUM,PPARG,FOSL1,SLAMF7,JUND,USF2,USP4,CTSC,NR4A2,AK4,FBLN5,ABCG2,CREM,FADS1,SERTAD3,CD9,AHNAK,C3,ITGB1,HADHA,PPP2R1A,ID3,STK24,BRIP1,B3GNT2,ATP6V0E1,DNM2,GBF1,CASP2,ATP5G1,MAP2K2,MARK4,CEACAM5,CFLAR,IL12A,NEIL3,PEX2,PDCD4,CDC25B,KPNA2,SLC20A1,AGPS,…
Infectious Disease	2.77E-24-1.09E-04	ZC3H7B,MAN1A1,AP3D1,PRKCH,CCT2,TXNIP,ACAN,POLB,ATP6V1A,NFKBIA,DAZAP2,UBP1,F3,PPARG,UPF3B,NUP155,ATG4B,SF3B1,CD9,C3,ITGB1,ABCE1,ATP6V0E1,DNM2,STX10,GBF1,ACTR2,CASP2,ASXL2,MAP2K2,PAF1,UQCRFS1,ZBED5,IL12A,GTF2H1,NEIL3,RNF144A,SLC20A1,SAMM50,CHMP1B,ITCH,HSPA6,PLK3,LAMA1,EIF2C2,CD63,SLC35A2,ANXA2,CAPN3,FTL,NR3C1,ATP6AP2,RRAGD,HLA-C,ATP6AP1,SPTBN1,CYP1A1,EIF2AK2,CLIP3,RBM7,SPHK1,PIK3C3,TXNL4A,C20orf24,…
Neurological Disease	3.68E-23-1.26E-03	MAN1A1,RCAN1,EPRS,BIN1,CLCN7,ETFB,POLB,SMTN,ATP6V1A,UBXN4,RNF5,F3,LUM,PPARG,ATP5C1,SVIL,NR4A2,DNAJC1,GPR137B,C1orf151-NBL1/NBL1,ABCG2,C3,HLA-B,ID3,B3GNT2,null,NAPA,CLCN3,CASP2,ABCD1,PTPLA,CFLAR,LRP8,PEX2,APH1B,CAPNS1,HSPA6,EIF4A2,MFN2,DHCR24,TYW1,ANXA2,EGR3,CAPN3,ANK3,ATP6AP2,FTL,NR3C1,BHLHE40,WWTR1,TPI1,ARMCX2,HLA-DRB4,EIF2AK2,SEPHS1,NPM1,HIGD1A,MAPT,RPS4X,SPHK1,ICA1,RAD51,HMGCR,NF1,CDC42,BANP,T…
Skeletal and Muscular Disorders	3.22E-17-1.25E-03	MAN1A1,RCAN1,PRKAR1A,ACAN,ETFB,CDKN1A,SMTN,ATP6V1A,HIPK2,NFKBIA,RNF5,LUM,F3,PPARG,ATP5C1,SQLE,CTSC,NR4A2,DNAJC1,MYCBP2,ABCG2,GSR,C3,ITGB1,HLA-B,STK24,ID3,B3GNT2,CASP2,NAPA,CFLAR,IL12A,PEX2,CDC25B,AGPS,INSIG1,CAPNS1,PLK3,FGFR1OP,EIF4A2,MFN2,TYW1,TNFAIP3,COL9A3,ITPR3,ANXA2,EGR3,EEF1E1,CAPN3,TPST1,NR3C1,FTL,ATP6AP2,HLA-C,BHLHE40,WWTR1,CCND3,TPI1,ARMCX2,HLA-DRB4,SEPHS1,NPM1,RPS4X,HIGD1A,MAPT,SPHK1,IC…
Hereditary Disorder	3E-15-1.26E-03	IER3,MAN1A1,RCAN1,FBL,CLCN7,ETFB,SMTN,ATP6V1A,CTNNA1,F3,GNPTAB,PPARG,ATP5C1,SEC24A,A2M,SVIL,PHYH,MT1E,GPR137B,TPD52,NDUFA13,C3,ID3,SLC25A1,B3GNT2,HMGB2,HERPUD1,NAPA,CASP2,SLC17A5,DKK3,PTPLA,SRD5A1,CFLAR,SDHB,RPH3A,ALDH3A2,SRPX,APH1B,UBE3A,CAPNS1,DHCR24,MFN2,ITPKB,PLK2,RHOB,ATP6AP2,BHLHE40,WWTR1,TPI1,ARMCX2,HLA-DRB4,SEPHS1,NPM1,SPHK1,DHCR7,TNNT1,ICA1,ITPR1,NPC2,HTT,ALDH6A1,FOS,NDUFS3,HMGCR,DDIT3,H…
Protein Synthesis	5.07E-15-1.26E-03	IER3,LSR,C2CD3,FAF1,ADM,MYC,PPARG,UPF3B,INSR,FOSL1,LAMP2,RPL30,USP4,ILF3,ATG4B,CTSC,DNAJC1,CDC37,STIP1,NDUFA13,C3,ITGB1,PASK,NR1H3,FBXO3,SUMO1,HERPUD1,SATB1,CASP2,PAIP1,UPF1,PITRM1,EIF3A,EIF4B,PCBP1,PDCD4,THOC1,NGLY1,UBE3A,CTSH,RLIM,ITCH,CAPNS1,RPS5,EIF4A2,RPL29,EIF2C2,SOCS1,RASA1,CAPN3,LARP4B,NR3C1,FN1,EEF1A1,CTSL1,CYP1A1,ADAMTS7,EIF2AK2,WNT5A,NPM1,PSMC2,BACE2,EIF3I,RPS4X,SPHK1,ARIH1,DIAPH2,FOS,…
Cell Cycle	1.18E-14-1.26E-03	IER3,PNN,PEBP1,PRKCH,TXNIP,FOSL2,BTG2,PRKAR1A,CREG1,POLB,PLA2G16,CDKN1A,DDX17,HIPK2,IL11,ADM,NFKBIA,ATMIN,MYC,PTPN1,CRLF3,LGALS3,RCHY1,TOPBP1,ACLY,PPARG,ELAC2,BRCA1,INSR,TPM1,FOSL1,JUND,MNAT1,NR4A2,DEK,GAL,HBEGF,ABCG2,CREM,GNL3,GRB10,ITGB1,ID3,SMARCE1,CASP2,TOP2A,MAP2K2,LIG1,UPF1,CKAP2,PAF1,UQCRFS1,RB1CC1,IL12A,MAP2K5,PRMT1,NFATC1,THOC1,CDC25B,KPNA2,PPP2R5C,CD320,DBI,NR4A3,PTN,CAPNS1,PLK3,USP22,M…
Gastrointestinal Disease	4.38E-13-1.35E-03	ADSL,PPP2R1B,LSR,TXNIP,BTG2,PRKAR1A,CRYL1,POLB,CDKN1A,DDX17,TUBB2A,CTNNA1,IL11,TGFBR2,MYC,MCAM,COL6A1,RNF5,PTPN1,RPS19,LGALS3,F3,ACLY,PPARG,BRCA1,TUBB4B,INSR,SEL1L3,A2M,TUBD1,USP4,SQLE,ATG4B,CTSC,PHYH,NUCB1,MT1E,HBEGF,GOT1,TPD52,GAL,RPP40,ABCG2,STIP1,TMEM97,CD9,C3,PPP2R1A,BNIP3,NR1H3,HMGB2,CASP2,TOP2A,TRAP1,GMPS,LIG1,SRD5A1,EIF3A,RB1CC1,CEACAM5,FHOD3,SDHB,NEIL3,LRP8,PDCD4,THOC1,CDC25B,KPNA2,SLC20…
RNA Post-Transcriptional Modification	9.83E-13-1.95E-04	CDKN2A,SRSF7,PNN,NPM1,ADAT1,RPL7,FBL,CELF1,PABPC4,DDX17,HNRNPR,PPAN,TXNL4A,HTT,TXNL4B,RPS19,RPS17/RPS17L,CELF2,RBM3,HEATR1,DDX52,KHSRP,CDC42,INTS6,HNRPDL,SUPT5H,HNRNPH3,INTS9,SF3B1,SYNCRIP,TSEN2,NUDT21,RPS28,DDX39A,NCBP2,HNRNPL,SF3A2,LSM3,PRPF31,KHDRBS3,IVNS1ABP,SRPK1,SNRPD2,ADARB1,RPL35A,RPS15,LUC7L3,UPF1,SRSF3,PCBP1,CSTF2,HNRNPA2B1,GRSF1,RPS16,THOC1,RNMT,MBNL1,null,AHCYL1,RPL11,PRPF4B,KIN,SRRM1…
Cellular Development	1.9E-12-1.31E-03	AP3D1,RCAN1,CTDSPL,PRKCH,BIN1,TXNIP,PRKAR1A,CREG1,POLB,CDKN1A,DDX17,GMPR2,ANKRD27,TXNRD1,HIPK2,NFKBIA,MCAM,RNF5,ERBB2IP,LGALS3,F3,LUM,PPARG,FOSL1,JUND,EN2,NR4A2,FBLN5,CBX5,C1orf151-NBL1/NBL1,ABCG2,CREM,CD9,C3,HNRNPL,ITGB1,PPP2R1A,ID3,STK24,GIT2,null,NAPA,CASP2,UQCRFS1,CEACAM5,CFLAR,IL12A,NEIL3,PEX2,PDCD4,CDC25B,KPNA2,DLK2,SLC20A1,INSIG1,PTN,ITCH,CAPNS1,LAMA1,MFN2,GNG4,FBRS,TNFAIP3,CD63,ANXA2,EGR3…
Developmental Disorder	2.46E-11-1.26E-03	IER3,RCAN1,LSR,FOSL2,DAG1,CLCN7,PRKAR1A,ACAN,POLB,CDKN1A,SP3,SMTN,XRCC4,HIPK2,TXNRD1,IL11,NFKBIA,ADM,ATMIN,MYC,TGFBR2,RPS19,HIP1,PIGA,UBP1,GNPTAB,F3,PPARG,TRPV4,BRCA1,TPM1,GPR126,CTSC,PHYH,HBEGF,GAL,FANCI,PELO,CREM,CELSR1,C3,SALL2,GRB10,HADHA,ITGB1,PDHA1,BRIP1,NR1H3,RBBP6,SATB1,CLCN3,SLC17A5,LIG1,WASL,CFLAR,MAP2K5,NFATC1,PEX2,ALDH3A2,SLC20A1,DBI,INSIG1,AGPS,NR4A3,UBE3A,ETHE1,LAMA1,SLC2A1,PAXIP1,R…
Organismal Survival	7.34E-11-7.34E-11	FBL,TXNIP,PRKAR1A,AKT3,POLB,CDKN1A,DDX17,XRCC4,HIPK2,NFKBIA,MYC,TMED10,RNF5,PTPN1,RPS19,HIP1,CRLF3,PIGA,LGALS3,TOPBP1,UBP1,ACLY,F3,PPARG,FERMT2,BRCA1,INSR,FOSL1,LAMP2,USF2,NR4A2,MT1E,HBEGF,CREM,C3,ITGB1,HADHA,BRIP1,NR1H3,PPIF,null,RBBP6,CASP2,CLCN3,WASL,TNNI3,CFLAR,MAP2K5,IL12A,WDR1,PRMT1,LRP8,NFATC1,VPS41,PDCD4,INSIG1,NR4A3,UBE3A,UCP2,CAPNS1,ETHE1,SLC2A1,MFN2,PAXIP1,SMAD3,HIST1H1C,TNFAIP3,SLC31A…
Connective Tissue Development and Function	1.86E-09-1.01E-03	IER3,TXNIP,BTG2,FOSL2,PRKAR1A,POLB,CDKN1A,XRCC4,HIPK2,NFKBIA,ADM,MYC,TGFBR2,PTPN1,RNF5,PPARG,BRCA1,INSR,TPM1,FOSL1,JUND,A2M,MT1E,HBEGF,CD9,GRB10,ITGB1,ID3,BNIP3,SUMO1,WASL,UQCRFS1,PRMT1,PEX2,THOC1,AMD1,DLK2,INSIG1,CAPNS1,SLC2A1,SMAD3,FBRS,SOCS1,PLK2,RHOB,FN1,NR3C1,LRPAP1,IGF2R,EEF1D,WWTR1,VASP,CCND3,EIF2AK2,NPM1,WNT5A,EIF3I,SPHK1,PTPN2,ALDH6A1,CAPN2,FOS,OGG1,RNF187,NRAS,ATF2,BTG1,NGFR,LOX,INPP4A,…
Cellular Movement	4.74E-09-1.34E-03	RCAN1,PRKAR1A,ACAN,CDKN1A,ABHD2,HIPK2,NFKBIA,MCAM,RNF5,LGALS3,F3,LUM,PPARG,FERMT2,FOSL1,JUND,CTSC,NR4A2,FBLN5,CBX5,C1orf151-NBL1/NBL1,CD9,C3,ITGB1,HNRNPL,ID3,STK24,GIT2,DNM2,null,CLCN3,MAP2K2,IL12A,LRP8,PDCD4,PEX2,CDC25B,RNF144A,KPNA2,PACSIN2,PTN,CAPNS1,FGFR1OP,PLK3,LAMA1,TNFAIP3,CD63,ANXA2,BHLHE40,WWTR1,PLXNA1,TBX3,NPM1,MAPT,SPHK1,ROPN1B,PIK3C3,PTPN2,COL4A1,NRAS,SEPT11,BCAR3,LOX,ATF3,NF1,ADAM9,C…
DNA Replication, Recombination, and Repair	5.56E-09-1.34E-03	PEBP1,PRKCH,FBL,BIN1,PDS5A,BTG2,UBE2V1,AKT3,POLB,CDKN1A,TMEM161A,XRCC4,ADM,NFKBIA,ATMIN,MYC,LGALS3,TOPBP1,PPARG,BRCA1,INSR,TSPYL1,NAP1L1,A2M,NR4A2,DEK,FBLN5,HBEGF,CREM,SALL2,ITGB1,ID3,STK24,BRIP1,BNIP3,HMGB2,SUMO1,CASP2,TOP2A,LIG1,UPF1,MAP2K5,NEIL3,THOC1,WAPAL,KPNA2,PTN,NR4A3,RPA3,PLK3,KIN,PAXIP1,SMAD3,PLK2,RRAS2,FN1,NR3C1,UBE2A,HINFP,EIF2AK2,NPM1,BIK,MCL1,SPHK1,RAD51,HMGN2,FOS,OGG1,CAPN2,TIA1,PO…
Protein Degradation	8.33E-09-2.64E-04	CDKN2A,IER3,USP18,LSR,C2CD3,FAF1,UBE2K,PPP2CA,RAD23A,CAV1,ASB9,PSMD2,STX12,CDKN2AIP,LAMP2,USP4,EDEM3,ATG4B,CTSC,EGLN2,DNAJC1,BAG3,UBE2H,CDC37,IPO9,C3,ITGB1,HTRA1,NR1H3,FBXO3,SUMO1,HERPUD1,CASP2,SDC4,PITRM1,ATG7,THOC1,NGLY1,CTSH,UBE3A,ITCH,RLIM,CAPNS1,DERL2,TPP1,BAG6,SNX1,SOCS1,CNDP2,CAPN3,FTL,CTSB,EDEM1,SERPINB1,CTSL1,UBE2D3,TGM2,PRSS12,ADAMTS7,WNT5A,PSMC2,BACE2,MMP2,MSRB2,SPHK1,C9orf3,CAST,ARIH1…
Cellular Assembly and Organization	3.2E-08-1.18E-03	BIN1,BTG2,DAG1,ACAN,C2CD3,CDKN1A,HIPK2,ANKRD27,POLDIP2,CTNNA1,ADM,NFKBIA,MYC,TMED10,PTPN1,RNF5,HIP1,PEX1,FERMT2,PPARG,TRPV4,BRCA1,TPM1,LAMP2,A2M,MNAT1,ATG4B,MYCBP2,MT1E,CEP170,GAL,C1orf151-NBL1/NBL1,PELO,LYST,STIP1,CD9,C3,ITGB1,STK24,SYNGR1,NR1H3,DNM2,SMARCE1,SUMO1,HMGB2,null,ACAP2,SATB1,SLC17A5,WASL,DKK3,ABCD1,MARK4,CKAP2,RB1CC1,KLC1,CKAP4,PRMT1,PEX2,RAB13,CDC25B,INSIG1,PACSIN2,CHMP1B,PTN,CAPNS1…
Cellular Function and Maintenance	3.2E-08-1.34E-03	BIN1,CDKN1A,ANKRD27,NFKBIA,RNF5,LGALS3,PPARG,FERMT2,ATG4B,NR4A2,AP2S1,MYCBP2,CEP170,C1orf151-NBL1/NBL1,NDUFS1,CD9,C3,ITGB1,STK24,DNM2,ACAP2,null,CASP2,CLCN3,SLC17A5,MAP2K2,CKAP2,MARK4,ABCD1,CFLAR,CKAP4,LRP8,PEX2,CDC25B,KPNA2,CHMP1B,PACSIN2,PTN,CAPNS1,FGFR1OP,LAMA1,MFN2,CD63,ANXA2,NR3C1,CLIP1,WWTR1,ATP6AP1,EIF2AK2,NPM1,CLIP3,MAPT,SPHK1,PIK3C3,ARHGEF18,RDX,KRT18,SEPT11,LOX,ATF3,ALMS1,NF1,CDC42,MAPK…
Hematological Disease	5.16E-08-1.35E-03	IER3,BTG2,AKT3,POLB,CDKN1A,TUBB2A,XRCC4,TXNRD1,NFKBIA,MYC,TGFBR2,MCAM,PTPN1,RPS19,HIP1,F3,TUBB4B,BRCA1,PDE8A,TUBD1,SF3B1,NUTF2,FANCI,ABCG2,STIP1,PMF1,ITGB1,BRIP1,SATB1,TOP2A,CASP2,GMPS,MSMO1,CFLAR,IL12A,NEK3,PDCD4,KPNA2,SRPX,TNFAIP3,HIST1H1C,SOCS1,ANXA2,STX11,FN1,NR3C1,HDAC9,CTSL1,ASXL1,UBE2A,SPTBN1,CCND3,CYP1A1,EIF2AK2,NPM1,MCL1,TYK2,IDH1,SPHK1,RAD51,OGG1,COL4A1,NRAS,BTG1,EYA4,NQO1,HDAC4,PARD3,N…
Metabolic Disease	6.31E-08-1.26E-03	PSMC2,BTG2,CLCN7,SPHK1,NPC2,MYC,PTPN1,COL4A1,LGALS3,GNPTAB,CAV1,CEBPD,HDAC4,CD55,A2M,ABHD5,PHYH,AGA,MT1E,IDS,GAL,SIRT7,C3,HMGCL,SCARB1,FUCA1,DDAH1,GLB1,GALNS,ASAH1,SLC17A5,PSAP,CD47,CD200,NEU1,EEF2,TIMP1,ALDH3A2,UGCG,GALC,SMPD1,PPAP2B,CTSD,TPP1,CCNG1,ICAM1,GM2A,CD74,CSDA,ACP2,HEXB,RHOB,FN1,JUN,HEXA
Renal and Urological Disease	1.05E-07-4.48E-04	CDKN2A,OPTN,MAN1A1,ZC3H7B,YBX1,CTDSPL,PRKCH,DHX15,RPL7,BTG2,PSMD12,ATP5O,AP1G2,PSEN2,TUBB2A,NFKBIA,ADM,MYC,DAZAP2,ATMIN,LGALS3,CHAF1A,PPARG,CAV1,TUBB4B,PCBP2,TPM1,S100A1,KHSRP,PDE8A,TUBD1,HNRPDL,SF3B1,MT1E,UBE2H,ETS2,CD164,CD9,PPP2R1A,ITGB1,POR,AHCTF1,DNM2,RPL18,NDUFB7,SLC6A8,SPEN,ZC3H15,PSMD6,TOP2A,TNNI3,UQCRFS1,SDHB,MVD,TUBB,SAMM50,null,DBI,DLGAP4,BRAF,KXD1,PLAUR,CD44,RBM25,PBRM1,TNFAIP3,SLC31A…
Dermatological Diseases and Conditions	1.24E-07-3.97E-04	ZC3H7B,MAN1A1,PRKCH,DHX15,TXNIP,BTG2,RPS6KC1,AKT3,CDKN1A,PLA2G16,AP1G2,TUBB2A,HIPK2,ADM,ATMIN,DAZAP2,MCAM,MYC,RNF5,LGALS3,PPARG,TUBB4B,FOSL1,SLAMF7,JUND,A2M,TUBD1,LAP3,SQLE,SF3B1,NR4A2,DEK,GAL,GOT1,FADS1,C3,CLEC11A,ITGB1,HLA-B,DNM2,PPIF,PSMD6,TOP2A,SLC17A5,ATP5G1,LIG1,MAP2K2,UQCRFS1,CFLAR,IL12A,CDC25B,ALDH3A2,KPNA2,AMD1,SAMM50,MC1R,SLC31A1,CD63,SLC35A2,SOCS1,TNPO3,ANXA2,MYOF,RASA1,RHOB,FN1,NR3C1,…
Gene Expression	1.4E-07-1.34E-03	RCAN1,CTDSPL,CCT2,GTF2F1,TXNIP,MLXIP,CREG1,PRKAR1A,CDKN1A,DDX17,TXNRD1,HIPK2,NFKBIA,CRLF3,TCEAL1,UBP1,LUM,PWP1,UPF3B,PPARG,FOSL1,JUND,RPL30,USF2,EN2,NR4A2,MYCBP2,DNAJC1,CBX5,CREM,TAF1A,SERTAD3,CD9,ID3,BRIP1,BRPF1,ACTR2,PAIP1,UPF1,CKAP2,PAF1,CFLAR,ZBED5,LRP8,GTF2H1,PEX2,PDCD4,CDC25B,KPNA2,SLC20A1,TAF12,PLK3,USP22,EIF4A2,RPL29,TAF2,EIF2C2,TNFAIP3,EGR3,RBFOX2,CAPN3,NR3C1,SNAPC5,BHLHE40,EEF1D,PPP2R5A…
Embryonic Development	1.41E-07-1.26E-03	IER3,LSR,CLNS1A,BTG2,DAG1,PRKAR1A,DDX17,SP3,HIPK2,TXNRD1,CTNNA1,NFKBIA,MYC,TGFBR2,PTPN1,HIP1,PIGA,UBP1,F3,PPARG,BRCA1,AACS,MNAT1,NR4A2,HBEGF,ABCG2,CD9,NDUFA13,C3,CLEC11A,ITGB1,ID3,PDHA1,BNIP3,RBBP6,CASP2,LIG1,WASL,RB1CC1,CFLAR,THOC1,SLC20A1,NR4A3,ITCH,LAMA1,SLC2A1,MFN2,PAXIP1,SMAD3,HIST1H1C,TNFAIP3,SLC31A1,SOCS1,ANXA2,RASA1,MTF2,RHOB,FN1,IGF2R,RFXANK,WWTR1,SPTBN1,CCND3,MBD3,EIF2AK2,NPM1,MCL1,BIK,…
Organismal Injury and Abnormalities	2.05E-07-9.6E-04	CDKN2A,MAN1A1,ZC3H7B,YBX1,PRKCH,DHX15,TNFRSF11B,TXNIP,BTG2,CLCN7,DAG1,PSMD12,CDK5R1,PSEN2,AP1G2,TUBB2A,NFKBIA,TGFBR2,MYC,DAZAP2,ATMIN,CHAF1A,ABR,CAV1,TUBB4B,PCBP2,JUND,PDE8A,TUBD1,EFEMP1,MERTK,HNRPDL,PHYH,SF3B1,EGLN2,MT1E,UBE2H,ETS2,CD164,ITGB1,ITM2B,NR1H3,AHCTF1,DNM2,RPL18,SPEN,PSMD6,CLCN3,TNNI3,LIG1,ABCD1,RB1CC1,UQCRFS1,IL12A,SAMM50,null,TYRO3,DLGAP4,BRAF,KXD1,RBM25,SH2B3,SMAD3,IKBKB,SLC31A1,ST…
Lipid Metabolism	2.13E-07-1.32E-03	SC5DL,TXNIP,PLA2G16,SREBF2,HSD17B7,ADM,PTPN1,RDH11,ACP5,BRD2,CAV1,PPARG,INSR,LAMP2,SH3GLB1,IMPA1,USF2,PDE8A,SQLE,NR4A2,RHOQ,MT1E,GOT1,CREM,FADS1,LYST,ITGA6,APOC1,TMEM97,CD9,C3,HADHA,ITGB1,PASK,LSS,POR,NR1H3,NSDHL,GLB1,RENBP,ADORA2B,PNPLA6,ASAH1,DKK3,SRD5A1,ABCD1,ST3GAL5,ACAT2,ODC1,MVD,PEX2,MTMR2,PGRMC1,HRASLS,INSIG1,DBI,NR4A3,UCP2,PPAP2B,IFRD1,CYP51A1,GCKR,DHCR24,GM2A,SLC35A2,BSCL2,ACP2,NR3C1,FN1…
Molecular Transport	2.13E-07-1.26E-03	CDKN2A,AP3D1,TNPO1,TXNIP,SMG1,PSEN2,AP1G2,SREBF2,RGS14,XPOT,NFKBIA,TMED10,PTPN1,PEX1,ATXN1,RDH11,ACP5,PPARG,CAV1,BCL6,INSR,LAMP2,AK1,THOC5,NUTF2,CREM,ARFGAP1,ERP29,APOC1,IPO9,DDX39A,HADHA,ITGB1,PASK,NR1H3,SCAMP2,GOSR1,SUMO1,GLB1,SATB1,RENBP,NAPA,CASK,ASAH1,ABCD1,UPF1,ACAT2,ODC1,KLC1,HNRNPA2B1,PEX2,THOC1,RAB13,KPNA2,DBI,INSIG1,HRASLS,AHCYL1,UCP2,SLC25A4,RAB8A,IFRD1,GCKR,SNX1,NUDT4,NUP133,KPNB1,SLC…
Small Molecule Biochemistry	2.13E-07-1.32E-03	ADSL,TXNIP,PLA2G16,ADM,PTPN1,ACLY,PPARG,INSR,ATP5C1,LAMP2,USF2,PDE8A,SQLE,NR4A2,AK2,MT1E,GOT1,FADS1,LYST,CREM,NDUFS1,CD9,TMEM97,C3,ITGB1,HADHA,PASK,NR1H3,IPO8,TOP2A,RENBP,ATP5G1,DKK3,ABCD1,SRD5A1,ACAT2,PEX2,DBI,INSIG1,NR4A3,UCP2,MFN2,DHCR24,CTNS,SLC35A2,MCCC2,FN1,NR3C1,NMU,IGF2R,EEF1A1,CYP1A1,PSMC2,IDH1,SPHK1,IDI1,DHCR7,DCXR,NPC2,PIK3C3,HTT,FOS,ELOVL5,NRAS,NGFR,HMGCR,ACOX1,ALMS1,PARD3,CDC42,ABHD5…
Connective Tissue Disorders	2.4E-07-1.25E-03	PRKAR1A,ACAN,CDKN1A,FAF1,TUBB2A,HIPK2,NFKBIA,ADM,MYC,COL6A1,ATMIN,TGFBR2,RNF5,PIGA,CELF2,TOPBP1,ACLY,LUM,PPARG,TUBB4B,BRCA1,TRPV4,GPR126,TUBD1,LAP3,SQLE,MNAT1,CTSC,NR4A2,MYCBP2,DEK,ABCG2,GSR,CELSR1,C3,SALL2,GRB10,HLA-B,ITGB1,GALNT2,NR1H3,RPL32,RENBP,MAP2K5,IL12A,PEX2,CDC25B,INSIG1,AGPS,NR4A3,FGFR1OP,SMAD3,TNFAIP3,COL9A3,SOCS1,ITPR3,TNPO3,EEF1E1,EGR3,TPST1,FTL,FN1,NR3C1,PPFIA1,HLA-C,IGF2R,CTSL1,UB…
Immunological Disease	2.48E-07-2.94E-04	ACAN,FAF1,ADM,NFKBIA,MYC,PTPN1,RNF5,CELF2,TOPBP1,ACLY,PPARG,INSR,GPR126,NUP155,LAP3,MNAT1,SQLE,CTSC,NR4A2,MYCBP2,DEK,NUTF2,PMF1,STIP1,GSR,C3,GRB10,HLA-B,GALNT2,NR1H3,RPL32,SATB1,ATP5G1,MAP2K2,IL12A,LRP8,NEK3,PDCD4,KPNA2,NR4A3,UCP2,FGFR1OP,TNFAIP3,SOCS1,ANXA2,ITPR3,TNPO3,EGR3,EEF1E1,STX11,FN1,NR3C1,TPST1,HDAC9,IFI6,HLA-C,EEF1A1,CTSL1,UBB,CCND3,IFITM1,ADAMTS7,HLA-DRB4,WNT5A,MCL1,TYK2,SPHK1,ICA1,ITP…
Respiratory Disease	3.63E-07-3.93E-04	IER3,CDKN2A,ALPP,PPP2R1B,RPL7,HIST2H2BE (includes others),CDKN1A,GADD45B,FAM188A,PTGES,TUBB2A,HIPK2,NFKBIA,TGFBR2,MYC,RNF5,XRCC1,SIGMAR1,RAB32,F3,PPARG,CAV1,TUBB4B,INSR,RPL9,IMPA2,TUBD1,KEAP1,GAL,CD164,ABCG2,CD9,null,ITGB1,null,RARA,EIF3E,TMSB10/TMSB4X,TOP2A,ACTR10,CLCN3,CDC20,LIG1,PTTG1,EIF3A,THOC1,RAB13,EDNRB,null,SRPX,PPP2R5C,FOXM1,null,BRAF,PLAUR,CD44,HIST1H2AC,PLK3,SH2B3,HIST1H1C,EIF2C2,IGF1…
Reproductive System Disease	4.44E-07-9.95E-04	PRKCH,CTDSPL,CCT2,TXNIP,RPS6KC1,CDKN1A,SMTN,HIPK2,NFKBIA,MCAM,LUM,PPARG,UPF3B,FOSL1,SEL1L3,NUP155,EN2,CTSC,AP2S1,FBLN5,ABCG2,RPE,C3,PPP2R1A,HLA-B,BRIP1,PPIF,null,GBF1,CASP2,ASXL2,TNNI3,KCNG1,ZBED5,LRP8,NEIL3,GTF2H1,KPNA2,RNF144A,PTN,FGFR1OP,DHCR24,RPL29,EIF2C2,ITPR3,ANXA2,NR3C1,ATP6AP2,BHLHE40,SPTBN1,CCND3,HLA-DRB4,TBX3,BIK,ERAL1,MAPT,MAU2,DR1,CYBA,COL4A1,POLE2,KRT18,NRAS,FARP1,NEK9,TECR,NF1,ADAM…
Inflammatory Disease	1.47E-06-1.25E-03	ACAN,CDKN1A,FAF1,TUBB2A,ADM,NFKBIA,COL6A1,RNF5,CELF2,TOPBP1,LUM,ACLY,PPARG,TUBB4B,GPR126,TUBD1,LAP3,MNAT1,SQLE,CTSC,NR4A2,MYCBP2,DEK,ABCG2,GSR,C3,GRB10,HLA-B,GALNT2,NR1H3,RPL32,RENBP,ATP5G1,MAP2K2,MAP2K5,IL12A,CDC25B,NR4A3,FGFR1OP,SMAD3,TNFAIP3,COL9A3,SOCS1,TNPO3,ITPR3,EGR3,EEF1E1,FN1,FTL,TPST1,NR3C1,PPFIA1,HLA-C,IFI6,CTSL1,EEF1A1,UBB,CCND3,IFITM1,ADAMTS7,HLA-DRB4,WNT5A,MCL1,TYK2,SPHK1,ICA1,ITPR1…
Vitamin and Mineral Metabolism	2.11E-06-1.32E-03	CYP1A1,MMP2,DHCR7,IDI1,SREBF2,HSD17B7,ADM,INSIG2,BRD2,HMGCR,CAV1,SCD,MAPK1,PDE8A,FDFT1,SQLE,HSD17B1,STC1,SLC27A5,G6PD,FDPS,APOC1,ITGA6,APOE,CREB1,SCARB1,LSS,POR,NSDHL,NR1H3,PDSS1,ADORA2B,APLP2,DKK3,SRD5A1,ACAT2,ODC1,MVD,PEX2,PRKAG2,IGF1,DPM3,PGRMC1,DBI,INSIG1,LIF,CAT,BMP7,EBP,NR2F2,CYP51A1,DHCR24,PTPN11,LDLR,NR3C1,ASPA,FGFR4
Tumor Morphology	2.72E-06-1.26E-03	CDKN2A,RCAN1,TNFRSF11B,TXNIP,BTG2,CDKN1A,TNFRSF10B,HIPK2,ILK,IL11,NFKBIA,TGFBR2,MYC,MCAM,PPP2CA,LGALS3,BRD2,F3,ACLY,LUM,CAV1,PPARG,BRCA1,INSR,TPM1,NR4A2,HBEGF,TPD52,ABCG2,CREM,ITGA6,CACYBP,BAMBI,ITGB1,DYRK2,ID3,RARA,PARP1,SAT1,ATP2A2,CASP2,PTTG1,RB1CC1,CFLAR,IL12A,ODC1,MAP2K5,NFATC1,PDCD4,MLL,ATG7,THOC1,CDC25B,FOXM1,PTN,BRAF,PLAUR,CD44,SMAD3,IKBKB,IGF1R,CTGF,CCND1,SOCS1,ANXA2,ITGAV,RHOB,CXCL1,NR3…
Hepatic System Development and Function	2.94E-06-1.31E-03	YBX1,SMARCA4,SC5DL,LSR,CDKN1A,SP3,IL11,MYC,TGFBR2,ARNT,LGALS3,BRD1,ACP5,PPARG,CAV1,INSR,MAP2K4,JUND,AACS,EFEMP1,EGLN2,BRD4,MT1E,BAG3,CREM,CADM1,C3,HADHA,RARA,POR,NR1H3,SAT1,SPEN,ASAH1,LIG1,RB1CC1,CFLAR,ODC1,PEX2,ATG7,MLL,EDNRB,SLC20A1,FOXM1,PTN,FAH,SMAD3,IKBKB,IGF1R,CTGF,CCND1,BSCL2,SOCS1,ACP2,ITGAV,PPP3CA,JUN,IFNGR1,IGF2R,SPTBN1,AVP,CCND3,CYP1A1,MED1,TBX3,WNT5A,MAN2A2,HTT,FOS,KRT18,NRAS,NGFR,MT1…
Cell-To-Cell Signaling and Interaction	3.82E-06-1.12E-03	ACTN1,PNN,DAG1,CDC42BPA,PTPRK,MMP2,ILK,POLDIP2,CTNNA1,PPP2CA,PTPN1,LGALS3,DAB2,FERMT2,DSG2,CAV1,RALB,LOX,GNG5,CDC42,OGT,MERTK,LAMA5,TFPI2,NCK2,EHD1,FBLN5,HBEGF,PLD1,CADM1,ITGA6,IPO9,PDCD6IP,LGALS3BP,APOE,C3,SCARB1,ITGB1,GSN,IGFBP3,DNM2,GRB2,NEDD9,RHOC,NET1,JAG1,DDR1,ARHGEF4,SDC4,NEU1,TIMP1,DKK1,CTNND1,IGF1,SDC2,TGFA,CTSL2,PLAUR,KRAS,EGR1,CD44,RND3,SH2B3,ICAM1,SPARC,SMAD3,PTPN11,IGF1R,CTGF,CCND1,A…
Tissue Development	3.82E-06-1.18E-03	CDKN2A,PNN,SMARCA4,LSR,DAG1,PTPRK,CDC42BPA,CDKN1A,SP3,ILK,POLDIP2,ADM,CTNNA1,PTPN1,ARNT,LGALS3,BRD1,DAB2,FERMT2,CAV1,TPM1,MAP2K4,AACS,A2M,OGT,MERTK,NCK2,FBLN5,HBEGF,CADM1,PDCD6IP,IPO9,ITGA6,CD9,C3,ITGB1,DNM2,TMSB10/TMSB4X,GLB1,NET1,ARHGEF4,DDR1,SDC4,WASL,LIG1,RB1CC1,TUBB,ATG7,MLL,CDC25B,SLC20A1,FOXM1,BRAF,PLAUR,CD44,SH2B3,MFN2,ATF4,IKBKB,SMAD3,IGF1R,CTGF,CCND1,ITPKB,SOCS1,PPM1F,ANXA2,RASA1,ITGAV,…
Tissue Morphology	1.07E-05-1.26E-03	TXNIP,PRKAR1A,DAG1,CDKN1A,TXNRD1,HIPK2,ADM,NFKBIA,IL11,MYC,TGFBR2,RPS19,PIGA,LGALS3,UBP1,F3,LUM,FERMT2,PPARG,BRCA1,MNAT1,MT1E,PELO,HBEGF,ABCG2,LYST,NDUFA13,CD9,SALL2,C3,CLEC11A,HADHA,ITGB1,NR1H3,SATB1,SHOX2,SLC17A5,WASL,LIG1,DKK3,RB1CC1,CFLAR,IL12A,LRP8,NFATC1,NEIL3,VPS41,PEX2,SLC20A1,NR4A3,TYRO3,PTN,CAPNS1,LAMA1,MFN2,PAXIP1,SMAD3,EIF2C2,HIST1H1C,TNFAIP3,SLC31A1,ITPKB,SOCS1,RASA1,SPRY1,EGR3,FN1,N…
Organismal Development	1.59E-05-1.22E-03	RCAN1,LSR,FOSL2,DAG1,CLCN7,POLB,CDKN1A,SP3,TXNRD1,HIPK2,NFKBIA,CTNNA1,ADM,ATMIN,MYC,TGFBR2,PTPN1,HIP1,PIGA,LGALS3,TOPBP1,UBP1,LUM,F3,PPARG,BRCA1,INSR,FOSL1,JUND,LAMP2,AACS,USF2,OGT,MT1E,FBLN5,PELO,HBEGF,CELSR1,C3,GRB10,ITGB1,ID3,HMGB2,null,SATB1,RENBP,CLCN3,TNNI3,LIG1,RB1CC1,KLC1,IL12A,LRP8,THOC1,AMD1,SLC20A1,NR4A3,PTN,CAPNS1,LAMA1,MFN2,PAXIP1,RPL29,SMAD3,HIST1H1C,TNFAIP3,SLC31A1,ITPKB,PLK2,SOCS1…
Skeletal and Muscular System Development and Function	2.47E-05-4.48E-04	CDKN2A,SMARCA4,RCAN1,BIN1,PRKAR1A,CDKN1A,TNFRSF10B,ILK,ADM,POLDIP2,TGFBR2,MYC,PTPN1,CLIC4,F3,CAV1,PPARG,ITGA7,MAP2K4,MNAT1,SMARCD3,NR4A2,NAMPT,GDF11,FBLN5,NQO2,HBEGF,ABCG2,GNL3,ITGA6,CD9,CACYBP,ITGB1,ID3,RARA,DDR1,SDC4,CEACAM5,ODC1,IL12A,NFATC1,FOXM1,NR4A3,IFI16,PLAUR,IFRD1,LAMA1,MFN2,TNFAIP3,IGF1R,CCND1,SOCS1,MAPKAPK2,FN1,JUN,TGM2,SORT1,VASP,HINFP,ADAMTS7,RBL2,TBX3,GNA11,MMP2,CAPN2,FOS,NCOA1,BTG…
Cell Signaling	2.52E-05-9.13E-04	S100A13,PEBP1,SMG1,UBE2V1,DAG1,AKT3,TNIP1,PSEN2,TLE1,CDK5R1,ILK,HIPK2,IL11,MYC,TGFBR2,SDCBP,CAV1,TNIK,INSR,G3BP1,MAP2K4,CD55,ECM1,OGT,SCG2,NR4A2,PPP5C,DUSP3,MAP4K3,GPR89A/GPR89B,RPS6KA2,ITGB1,null,MAP2K2,PITRM1,MAP2K5,SLC20A1,FOXM1,HRASLS,BRAF,MC1R,SAE1,DHCR24,MFN2,GM2A,IKBKB,IGF1R,TNFAIP3,SLC31A1,ITPKB,PLK2,ITGAV,SPRY1,CAPN3,CXCL1,RRAS2,ATP6AP2,MAPKAPK2,RREB1,YWHAB,PSENEN,TANK,EEF1D,TGM2,RFXANK,…
Cell Morphology	2.56E-05-1.34E-03	RCAN1,TXNIP,PRKAR1A,CLCN7,CDKN1A,SMTN,ANKRD27,NFKBIA,RNF5,LGALS3,F3,FERMT2,PPARG,FOSL1,ATG4B,NR4A2,MYCBP2,CEP170,C1orf151-NBL1/NBL1,CREM,NDUFS1,CD9,C3,ITGB1,HADHA,ID3,null,ACAP2,CASP2,CLCN3,MAP2K2,MARK4,ABCD1,CFLAR,LRP8,PEX2,CDC25B,KPNA2,PACSIN2,PTN,CAPNS1,PLK3,LAMA1,MFN2,ITPR3,EGR3,NR3C1,HLA-C,BHLHE40,CLIP1,WWTR1,PLXNA1,CCND3,EIF2AK2,NPM1,MAPT,SPHK1,PIK3C3,RDX,NRAS,KRT18,SEPT11,LOX,BCAR3,ATF3,AC…
Digestive System Development and Function	3.27E-05-1.31E-03	YBX1,SMARCA4,CYP1A1,LSR,SC5DL,WNT5A,TBX3,MED1,CDKN1A,SP3,MAN2A2,IL11,TGFBR2,MYC,HTT,NRAS,KRT18,ACP5,BRD1,NGFR,CAV1,PPARG,MT1H,NQO1,INSR,ACOX1,MAP2K4,NF1,AACS,EFEMP1,FDFT1,EGLN2,DPH1,BRD4,PITPNA,BAG3,MT1E,CREM,CADM1,CYBRD1,C3,HMGCL,HADHA,POR,NR1H3,SAT1,SPEN,HPSE,JAG1,ASAH1,LIG1,PSAP,RB1CC1,ODC1,MLL,ATG7,PEX2,KAT6A,IGF1,SLC20A1,FOXM1,LIF,PTN,TGFA,FAH,EGR1,KRAS,SMPD1,CCNG1,MKL2,ATP7B,IKBKB,SMAD3,TOB…
Organ Morphology	3.27E-05-1.31E-03	CDKN2A,YBX1,CYP1A1,SC5DL,WNT5A,TBX3,MED1,CDKN1A,MAN2A2,IL11,PTPN2,TGFBR2,MYC,HTT,ARNT,NRAS,KRT18,ACP5,BRD1,NGFR,CEBPD,CAV1,PPARG,MT1H,NQO1,INSR,ACOX1,MAP2K4,EFEMP1,FDFT1,EGLN2,BRD4,PITPNA,BAG3,MT1E,PTPRF,CREM,CYBRD1,C3,HMGCL,HADHA,POR,NR1H3,SAT1,SPEN,HPSE,JAG1,ASAH1,LIG1,PSAP,RB1CC1,ODC1,PEX2,KAT6A,IGF1,SLC20A1,FOXM1,LIF,PTN,TGFA,FAH,PLAUR,CD44,EGR1,KRAS,SMPD1,CCNG1,ATP7B,ATF4,IKBKB,SMAD3,TOB1,CC…
Post-Translational Modification	3.94E-05-8.95E-04	PEBP1,PRKCH,BTG2,PRKAR1A,C2CD3,AKT3,CDKN1A,HIPK2,ADM,TGFBR2,PTPN1,HIP1,INSR,IMPA2,ILF3,ATG4B,MNAT1,CTSC,CSNK1G2,DNAJC1,POLR2B,CD9,C3,GRB10,PPP2R1A,ITGB1,STK24,GALNT2,PASK,NR1H3,FBXO3,CASP2,MAP2K2,PTPLA,MARK4,PITRM1,RB1CC1,MAP2K5,PRMT1,GTF2H1,THOC1,NEK3,CDC25B,UBE3A,CTSH,PTN,TYRO3,CAPNS1,PLK3,LAMA1,ITPKB,PLK2,SOCS1,CAPN3,FTL,FN1,CTSL1,CCND3,PPP6C,ADAMTS7,EIF2AK2,WNT5A,CLIP3,BACE2,TYK2,SPHK1,MSRB2,…
Cellular Compromise	4.82E-05-7.14E-04	YBX1,NPM1,SLC38A2,MAPT,POLB,CDKN1A,CDK5R1,CAST,XRCC4,HSPA4,MYC,PTPN1,CSPG4,HTT,ATXN1,KRT18,ANXA7,NGFR,CAV1,MT1H,BRCA1,NQO1,INSR,DDIT3,ZDHHC17,HLA-E,PRDX6,ISCU,NAMPT,MT1E,NCK2,CDC37,APOE,TMBIM6,ITGB1,RARA,BRIP1,DCLRE1C,GSN,SUMO1,null,PARP1,USP1,SNCAIP,ATP2A2,PSAP,YKT6,PTTG1,ATP13A2,RAD51C,ATG7,ALDH3A2,IGF1,FANCG,DNAJB1,CAT,CTSD,ATF4,MAP3K5,PRDX1,BSCL2,RASA1,PSMC4,HSD17B10,CTSB,BCL2,CTSL1,HNRNPA1,T…
Hair and Skin Development and Function	5.71E-05-1.31E-03	CDKN2A,TSC22D3,PNN,PRKCH,WNT5A,MED1,FERMT1,MMP2,PTPRK,ADCY1,SPHK1,CDKN1A,PTGES,CTNNA1,MYC,PPP2CA,PTPN1,FOS,NRAS,DAB2,CAV1,INSR,FOSL1,MAP2K4,NDUFAB1,OGT,PTP4A1,RNF7,FBLN5,HBEGF,PDCD6IP,C3,SCARB1,PPP2R1A,ITGB1,PAK2,GRB2,SUMO1,CASK,SDC4,NEU1,CSTF2,TIMP1,MLL,THOC1,LDLRAP1,IGF1,RNMT,SDC2,CAT,CTSL2,TGFA,PTN,CCNG2,PLAUR,EGR1,KRAS,MAP3K7,SNAI2,ICAM1,SMAD3,MAGED1,CCND1,VDR,ANXA2,CDK2,PTK2,ITGAV,BOP1,TGFBR…
Cardiovascular System Development and Function	8.39E-05-7.59E-04	RCAN1,PRKAR1A,C2CD3,AKT3,CDKN1A,HIPK2,ADM,TGFBR2,MYC,PTPN1,LGALS3,UBP1,F3,PPARG,BRCA1,INSR,OGT,MNAT1,FBLN5,C3,ITGB1,ID3,HMGB2,SHOX2,TNNI3,RB1CC1,CFLAR,MAP2K5,NFATC1,PTN,CAPNS1,LAMA1,PAXIP1,SMAD3,TNFAIP3,EIF2C2,ANXA2,RASA1,MYOF,RHOB,EGR3,FN1,RREB1,LRPAP1,SPTBN1,CCND3,STX7,EIF2AK2,WNT5A,TBX3,SPHK1,DHCR7,HTATIP2,CAPN2,CYBA,COL4A1,ATF2,BTG1,ANKRD17,LOX,ATF3,PARD3,NF1,ADAM9,CDC42,MAPK1,NFYA,GTF2I,DLG1…
Hepatic System Disease	8.82E-05-1.35E-03	CDKN2A,YBX1,ALPP,LSR,TXNIP,PRKAR1A,TM4SF1,CDKN1A,TNIP1,IL11,TGFBR2,MYC,BZW1,NDRG1,ORC6,CENPA,F3,PPARG,TUBB4B,BRCA1,RPL9,ASF1B,BIRC2,EFEMP1,PGK1,MERTK,SQLE,HNRPDL,PHYH,KEAP1,MT1E,NQO2,GOT1,TPD52,RARA,NR1H3,ARID3A,SPEN,CASP2,TOP2A,LIG1,RB1CC1,NEIL3,CDC25B,SLC20A1,SRPX,FOXM1,TYRO3,BRAF,FAH,PLAUR,CD44,SLC2A1,CAP2,ATF4,SMAD3,IKBKB,CCND1,SOCS1,PSMD4,ANXA2,GLUD1,MKI67,FTL,JUN,ASRGL1,GOLM1,IGF2R,FGFR4,SP…
Psychological Disorders	9.15E-05-1.7E-04	CDKN2A,TMEM2,EPRS,SC5DL,BIN1,POLB,LPHN1,CDK5R1,PSEN2,SREBF2,UBXN4,TGFBR2,ARNT,F3,ACLY,CAV1,PPARG,BRCA1,VPS13B,PITPNC1,A2M,HNRPDL,ETS2,C1orf151-NBL1/NBL1,ABCG2,PUM1,APOC1,C3,ITM2B,HTRA1,LSS,CASP2,LRP8,TUBB,HSPA6,SLC2A1,MFN2,DHCR24,SPG21,PAXIP1,GM2A,CTGF,NR3C1,JUN,CTSB,AIFM1,SORL1,LRPAP1,TGM2,UBB,EIF2AK2,MAPT,DHCR7,GLRX,SERPINE2,OGG1,HTT,AKAP2/PALM2-AKAP2,NGFR,HMGCR,SCD,NQO1,NAE1,DDIT3,CANX,FDFT1,G…
Nervous System Development and Function	1.04E-04-8.53E-04	ACAN,CDC42BPA,CDKN1A,CDK5R1,MICALL2,HIPK2,PMP22,PPARG,CAV1,A2M,MNAT1,RHOQ,NCK2,GAL,CD9,ITGB1,SYNGR1,SLC17A5,NEIL3,RAB13,PTN,LAMA1,MFN2,IKBKB,IGF1R,ITGAV,SEMA5A,RHOB,CXCL1,FN1,JUN,ELMO2,IFNGR1,TGM2,FGFR4,PLXNA1,NINJ1,GAS7,RAB17,WNT5A,MMP2,MAPT,ROBO1,SERPINE2,CSPG4,HTT,BAIAP2,RAB22A,NGFR,SEPT11,SOCS2,EZR,NF1,STK38L,ADNP,CDC42,MAPK1,FNBP1,DBN1,GRK5,PDE4A,PTPRF,MPRIP,PLD1,APOE,CREB1,PIP5K1A,TRIO,ZNF2…
Endocrine System Disorders	1.3E-04-3.4E-04	ALPP,TUBB3,PSMC2,BTG2,TOP2A,CDKN1A,CD200,TUBB2A,EEF2,TIMP1,THOC1,IGF1,MYC,H2AFY,PTPN1,QKI,COL4A1,LGALS3,XPC,TUBA4A,CEBPD,TUBB4B,PPAP2B,CCNG1,EIF3C/EIF3CL,ICAM1,A2M,TUBD1,CD74,CSDA,DNMT1,MT1E,LDHA,RHOB,STK11,GAL,MKI67,FN1,JUN,C3,HMGCL,SCARB1,IGFBP3,DDAH1
Reproductive System Development and Function	1.65E-04-6.41E-04	TSC22D3,AKT3,CDKN1A,ADM,MYC,ARNT,HIP1,XRCC1,UBP1,PPARG,BRCA1,SETD2,EFEMP1,MERTK,PHYH,SEPT4,GAL,CREM,CADM1,PUM1,C3,GRB10,RARA,POR,NR1H3,CASP2,SRD5A1,LRP8,PARL,CDC25B,FANCG,BRAF,TYRO3,CD44,ATF4,IGF1R,EIF2C2,CCND1,PLK2,ITGAV,FN1,IFNGR1,IGF2R,CLIP1,DMTF1,SPTBN1,FKBP1B,MED1,TBX3,WNT5A,BIK,MAN2A2,PEG10,SERPINE2,HSPA4,FOS,CAPN2,COL4A1,NCOA1,ATF2,NUMB,ACOX1,HOXD13,MAPK1,CCNE2,CD59,DLG1,CPEB1,DACT1,STC1,A…
Renal and Urological System Development and Function	1.75E-04-1.21E-03	PNN,DAG1,ARHGEF4,MAPT,CKAP2,PTTG1,PSEN2,TIMP1,MAPRE1,THOC1,CTNNA1,CDC25B,NFKBIA,HIP1,CTSL2,ITCH,PLAUR,CAV1,CEBPD,LOX,BCL6,SLC2A1,SPARC,ICAM1,TNFAIP3,LAMA5,PLXND1,PTK2,ITGAV,HBEGF,ABCG2,FN1,CADM1,PDCD6IP,MBL2,C3,BCL2,ACTN4,ITGB1,CLIP1,WT1,AVP
Cardiovascular Disease	1.91E-04-1.91E-04	IER3,DNAJC3,PTGES,SP3,MAP2K5,TIMP1,NFKBIA,IL11,IGF1,LIF,MAP2K3,LMCD1,CAV1,CTSD,MAP3K7,ATF3,MAP2K4,MAP3K5,PTPN11,IKBKB,HSPB8,TNFAIP3,CTGF,CTSC,PTK2,PPP3CA,GLRX3,HBEGF,GAL,CREM,JUN,CTSB,S100A6,EEF1D,RAB2A
Nucleic Acid Metabolism	2.78E-04-1.06E-03	SMARCA4,ADSL,TXNIP,PSMC2,DCXR,ATP5O,RGS14,ATP5J2,ATP5D,HTT,NDUFAF1,NRAS,ACLY,ATP5L,INSR,ATP5B,ATP5C1,AK1,TPT1,AK2,EEF1B2,NDUFS1,PASK,SMARCA5,IDH3A,PARP1,MAP1LC3B,IPO8,ATP2A2,TOP2A,ATP5G1,RUVBL2,RHOBTB3,ABCD1,CDK1,PGD,PRKAG2,ATP5A1,SLC25A4,LONP1,DNA2,MFN2,RFC3,ATP7B,CTNS,KIF20B,SLC35A2,NUDT9,MDH1,MCCC2,PSMC4,EEF1A1,CYTH2
Energy Production	3.02E-04-3.02E-04	SMARCA5,SMARCA4,IPO8,PSMC2,ATP2A2,TOP2A,ATP5G1,RUVBL2,RHOBTB3,ABCD1,ATP5O,ATP5J2,ATP5D,ATP5A1,ACLY,ATP5L,LONP1,ATP5B,DNA2,ATP5C1,RFC3,ATP7B,CTNS,KIF20B,AK2,NDUFS1,PSMC4
Protein Trafficking	3.24E-04-1.26E-03	CDKN2A,STX7,TNPO1,AP3D1,NPM1,TXNIP,ARF3,MAPT,IPO7,AP1G2,PSEN2,NFKBIA,TMED10,HTT,PEX1,CAV1,BCL6,TIMM44,EHD1,NUTF2,ERP29,KPNA6,ARFGAP1,SRP54,IPO9,ITGB1,RAMP1,SCAMP1,IGFBP3,SCAMP2,SUMO1,GOSR1,GDI2,SATB1,CASK,NAPA,RAB3GAP2,COG2,KLC1,RAB13,KDELR2,KPNA2,AHCYL1,RAB8A,GCKR,SNX1,PTPN11,TOB1,CD74,APPBP2,KPNB1,PPP3CA,ITGAV,RHOB,TRAK1,TOMM40,JUN,EPS15,TSG101,VAMP1,IGF2R,SORT1,RAB2A,SPTBN1
RNA Trafficking	3.26E-04-3.26E-04	SRSF7,SMG1,NUDT4,THOC5,FMR1,UPF1,NUP133,SRSF3,EIF4E,XPOT,HNRNPA2B1,THOC1,DDX3X,DDX39A,HNRNPA3,CKAP5,AGFG1,SMG5
Organ Development	4.18E-04-4.18E-04	SMARCA4,MED1,LSR,LIG1,RB1CC1,SP3,MLL,ATG7,SLC20A1,FOXM1,BRD1,KRAS,MAP2K4,NF1,MKL2,AACS,SMAD3,DNM1L,SOCS1,DPH1,TGFBR3,CIAPIN1,CADM1,JUN,IGF2R,SPTBN1,CCND3
RNA Damage and Repair	4.53E-04-4.53E-04	HNRNPD,PNRC2,TOE1,SMG1,NCBP2,UPF1,UPF3B,EIF3E,RBM8A,SMG5
Hematological System Development and Function	9.46E-04-1.34E-03	TXNIP,CDKN1A,IL11,NFKBIA,TGFBR2,MYC,MCAM,RPS19,LGALS3,LUM,F3,PPARG,MT1E,HBEGF,LYST,ABCG2,CD9,C3,CLEC11A,NR1H3,SATB1,DKK3,WASL,LIG1,CFLAR,IL12A,NEIL3,NFATC1,SLC20A1,PTN,TYRO3,CAPNS1,SMAD3,TNFAIP3,ITPKB,SOCS1,EGR3,NR3C1,FN1,HLA-C,BHLHE40,IGF2R,ASXL1,VASP,CCND3,SERPINB6,CYP1A1,EIF2AK2,NPM1,BIK,MCL1,TYK2,SPHK1,PTPN2,FOS,HTT,COL4A1,TIA1,TMPO,TRAF1,NGFR,NQO1,ST3GAL1,ATF3,NF1,BHLHE41,CDC42,TCF3,PDE4B,CD…
Inflammatory Response	9.46E-04-1.34E-03	DDR1,CD47,CD200,PTGES,CTSS,IL12A,NFKBIA,IL11,MCAM,PTPN2,ST6GAL1,MPZ,COL4A1,LIF,LGALS3,PTN,CLIC4,CTSL2,PPARG,MT1H,SMPD1,BHLHE41,SH2B3,ICAM1,CNN2,IKBKB,TNFAIP3,MDK,VDR,SOCS1,LDLR,ITGAV,MT1E,SLFN12,HBEGF,FN1,MAPKAPK2,MBL2,APOE,BCL2,SCARB1,IFNGR1,TIMP2,PVR,TGM2,NR1H3
Drug Metabolism	1.26E-03-1.26E-03	ME2,G6PD,GSR,GLO1
Immune Cell Trafficking	1.34E-03-1.34E-03	MCAM,FN1,ICAM1,COL4A1,CTSL2,TIMP2,CD47,PVR,PPARG,LDLR,CTSS,ITGAV

## Sheet: S1b
Table S1b. Toxicologically related functionalities and pathways associated with hPNPaseold-35 knockdown identified by IPA
Toxicity Lists	-log(p-value)	Ratio	Molecules
Cholesterol Biosynthesis	7.62	0.75	FDPS,SC5DL,FDFT1,SQLE,EBP,IDI1,DHCR7,HMGCR,LSS,ACAT2,HMGCS1,MVD
Renal Necrosis/Cell Death	5.93	0.217	IER3,EIF2AK2,BIK,MCL1,MAPT,SPHK1,CDKN1A,DDX17,ITPR1,PSEN2,TNFRSF10B,HIPK2,ILK,NFKBIA,MYC,FOS,HTT,HIP1,F3,PMP22,PPARG,MT1H,CAV1,CEBPD,BCL6,DUSP4,PRMT2,ATF3,DDIT3,MAP2K4,NDUFAB1,BIRC2,CDC42,TCF3,FDFT1,NAMPT,TRPS1,MT1E,TCF4,PPP5C,ABCG2,CCNI,APOE,ITGB1,PAK2,BNIP3,IGFBP3,CASP2,BNIP3L,ATP13A2,CFLAR,THOC1,ATG7,IGF1,DPM3,APRT,CAT,ZMYND11,SLC47A1,ITCH,CD44,KRAS,CUL4B,MOAP1,SLC2A1,PRKDC,ICAM1,MAP3K5,IGF1R,…
Mitochondrial Dysfunction	5.63	0.277	NDUFA3,NDUFB7,BACE2,CYB5R3,UQCRFS1,PSEN2,SDHB,GLRX2,COX6B1,null,APH1B,NDUFAF1,ATP5A1,CAT,NDUFS2,COX7A1,NDUFS3,UCP2,ATP5B,MAP2K4,SDHAP1,ATP5C1,NDUFAB1,NDUFA8,UQCR10,SDHC,SURF1,GPX4,TRAK1,UQCR11,GSR,NDUFS1,NDUFB5,NDUFA13,HSD17B10,AIFM1,PSENEN,PDHA1,NDUFA2
Liver Proliferation	5.6	0.254	ERCC1,SAT1,MED1,CDKN1A,RB1CC1,CFLAR,ODC1,TIMP1,EDNRB,MYC,TGFBR2,IGF1,FOS,SLC20A1,ARNT,FOXM1,LGALS3,TGFA,PTN,FAH,TRIM24,NGFR,PPARG,MT1H,CAV1,INSR,MAP2K4,JUND,ATF4,SMAD3,MAPK1,IKBKB,TOB1,IGF1R,CTGF,CCND1,MDK,CDK2,ITGAV,MT1E,JUN,C3,BCL2,IFNGR1,RARA,SPTBN1,CCND3,AVP
Liver Necrosis/Cell Death	4.81	0.228	IER3,MED1,MCL1,CDKN1A,GADD45B,TNIP1,ADM,MYC,FOS,PTPN1,ARNT,NGFR,F3,MT1H,SCD,DUSP4,DDIT3,MAP2K4,NF1,LAMP2,JUND,RBCK1,AGA,MT1E,APOE,C3,TMBIM6,API5,IRF5,FKBP1A,ERCC1,RB1CC1,CFLAR,TIMP1,IGF1,SLC20A1,LIF,UGCG,FAH,SLC25A4,SMPD1,BUB1,SMAD3,IKBKB,CCND1,SOCS1,LDLR,ITGAV,SH3BP5,IL15,JUN,CTSB,BCL2,IFNGR1,SPTBN1
NRF2-mediated Oxidative Stress Response	4.05	0.22	CYP1A1,PRKCH,TXNRD1,ACTG2,PIK3C3,UBE2K,FOS,NRAS,PIK3R3,NQO1,DNAJC4,MAP2K4,FOSL1,JUND,MAPK1,HSPB8,FTH1,KEAP1,DNAJC1,CLPP,NQO2,ERP29,STIP1,GSR,PMF1,SCARB1,HERPUD1,MAP2K2,HSP90AB1,DNAJC3,MAP2K5,DNAJB1,CAT,MAP2K3,AKR7A2,GSTO1,PRKD3,KRAS,PPIB,MAP3K7,ATF4,MAP3K5,PRDX1,SLC35A2,GSTM3,MGST2,RRAS2,FTL,JUN,DNAJC6,UBB
p53 Signaling	3.88	0.274	CDKN2A,MED1,AKT3,GADD45B,CDKN1A,TNFRSF10B,HIPK2,PIK3C3,SERPINE2,ADCK3,TOPBP1,PIK3R3,BRCA1,CCNG1,SNAI2,PRKDC,CCND1,KAT2B,CDK2,FASN,DRAM1,GNL3,JUN,BCL2,HDAC9,WT1
Acute Renal Failure Panel (Rat)	3.2	0.29	FOSL1,FKBP1A,A2M,SPHK1,CDKN1A,ANXA2,MT1E,TUBB,LDHA,ADM,MYC,FOS,JUN,ASPA,LGALS3,EGR1,CD44,ATF3
Cardiac Necrosis/Cell Death	2.75	0.206	IVNS1ABP,PPIF,PARP1,TXNIP,MCL1,MMP2,BNIP3L,CDKN1A,MAP2K5,FSTL1,DSP,ADM,IGF1,HSPE1,CAT,LIF,PTN,SCD,MAP2K4,FOSL1,S100A1,JUND,MFN2,MAP3K5,IKBKB,HSPB8,MAPK1,TNFAIP3,MDK,NAMPT,PPP3CA,CREM,SIRT7,MAPKAPK2,AIFM1,BCL2,TIMP2,HADHA,GSN,BNIP3
TGF-β Signaling	2.57	0.244	MAP2K4,GRB2,MAPK1,SMAD3,VDR,MAP2K2,SOS2,TGIF1,PIAS4,RRAS2,TGFBR2,FOS,JUN,RUNX3,BCL2,MAP2K3,NRAS,BMP7,UBB,KRAS,MAP3K7
Hypoxia-Inducible Factor Signaling	2.54	0.257	SUMO1,EIF2B2,null,IKBKB,UBE2I,ASPH,HSP90AB1,UBE2L6,PTK2,LDHA,UBE2H,UBE2M,ARNT,JUN,CREB1,UBE2D3,NQO1,UBE2A
Mechanism of Gene Regulation by Peroxisome Proliferators via PPARα	2.36	0.232	GRB2,ME1,DUT,MED1,IKBKB,MAPK1,PRKAR1A,MAP2K2,HSP90AB1,SOS2,NFKBIA,MYC,FOS,JUN,NCOA1,NRAS,PPARG,KRAS,INSR,MAP3K7,ACOX1,NR1H3
Recovery from Ischemic Acute Renal Failure (Rat)	2.25	0.429	TIMP1,TMSB10/TMSB4X,COL4A1,LGALS3,CCND1,SGK1
Cardiac Hypertrophy	2.24	0.18	IER3,FKBP1B,RCAN1,GNA11,CDKN1A,PTGES,SP3,SMTN,ACTG2,IL11,ADM,NFKBIA,RGS2,HTT,LMCD1,CAV1,ATF3,TPM1,MAP2K4,NF1,MAPK1,HSPB8,CTSC,HBEGF,GAL,CREM,SIRT7,APOE,CREB1,S100A6,GSN,GRB2,PARP1,ATP2A2,DNAJC3,MAP2K5,NFATC1,TIMP1,IGF1,LIF,MAP2K3,SLC25A4,CTSD,MAP3K7,MAP3K5,PTPN11,IKBKB,TNFAIP3,CTGF,VDR,PTK2,PPP3CA,GLRX3,JUN,CTSB,BCL2,EEF1D,RAB2A
PPARα/RXRα Activation	1.89	0.192	GRB2,ADIPOR1,MED1,GNA11,PRKAR1A,TGS1,ADCY1,HSP90AB1,MAP2K2,ADCY2,PRKAG2,NFKBIA,TGFBR2,MAP2K3,GK,NRAS,CKAP5,KRAS,INSR,MAP3K7,ACOX1,MAP2K4,ACAA1,IKBKB,SMAD3,MAPK1,IL1RAP,SOS2,FASN,TGFBR3,RRAS2,JUN,null
Anti-Apoptosis	1.76	0.281	BAG3,BIRC7,BIRC2,MCL1,BCL2,TNFAIP3,AVEN,BCL2L2,BNIP3
Decreases Permeability Transition of Mitochondria and Mitochondrial Membrane	1.75	0.6	HTT,BCL2,BTG2
Cardiac Fibrosis	1.66	0.187	GRB2,ATP2A2,DAG1,TNNI3,TIMP1,DSP,CTNNA1,HTT,F3,CAPNS1,CAV1,EGR1,BCL6,ATF3,NF1,MAP3K5,SMAD3,IGF1R,TNFAIP3,VDR,PTK2,PPP3CA,HBEGF,CREM,SIRT7,FN1,CREB1,APOE,ACSL1,ITGB1,TSC22D1
Oxidative Stress	1.55	0.228	ME1,ICAM1,PRDX6,PRDX1,GSTM3,GLRX2,GPX4,GSR,FOS,JUN,CAT,NQO1,BRCA1
Hepatic Fibrosis	1.55	0.204	NID1,A2M,SPARC,ICAM1,SMAD3,ACAN,MMP2,SDC1,TIMP1,MMP8,TGFBR2,IGF1,FN1,COL4A1,LGALS3,TGFA,LUM,IGFBP6,IGFBP3
Cell Cycle: G1/S Checkpoint Regulation	1.54	0.222	CDKN2A,HDAC4,RBL2,SMAD3,CCNE2,CCND1,CDKN1A,CDK2,MYC,GNL3,HDAC9,E2F5,RPL11,CCND3
Aryl Hydrocarbon Receptor Signaling	1.49	0.184	CDKN2A,SMARCA4,CYP1A1,MED1,HSP90AB1,CDKN1A,ALDH3A2,MYC,ALDH6A1,FOS,ARNT,GSTO1,NQO1,CTSD,MAPK1,CCND1,CCNE2,SLC35A2,NFIB,CDK2,GSTM3,FASN,NQO2,MGST2,JUN,DCT,TGM2,RARA,CCND3
RAR Activation	1.37	0.177	SMARCA4,PRKCH,PARP1,MED1,PRKAR1A,AKT3,ADCY1,GTF2H1,PRMT1,ADCY2,PRKAG2,FOS,NCOA1,RDH11,TRIM24,PIK3R3,PRKD3,NR2F2,PRMT2,MAP2K4,MAP3K5,SMAD3,MAPK1,CSNK2B,NR2F6,MNAT1,KAT2B,MAPKAPK2,JUN,RARA,IGFBP3
Primary Glomerulonephritis Biomarker Panel (Human)	1.36	0.364	IER3,HBEGF,MCL1,EGR1
Genes associated with Chronic Allograft Nephropathy (Human)	1.34	0.286	TIMP1,LAMA1,FN1,ICAM1,COL4A1,MMP2
Increases Liver Hyperplasia/Hyperproliferation	1.28	0.22	IL11,TGFBR2,MYC,BIRC2,JUN,FOXM1,IKBKB,CENPA,LIF,TGFA,HMGCR
Increases Depolarization of Mitochondria and Mitochondrial Membrane	1.23	0.294	PEBP1,EIF2AK2,HTT,BTG2,TGM2
Renal Glomerulus Panel (Human)	1.23	0.294	TJP1,DAG1,PTPRO,CDKN1A,WT1
Hormone Receptor Regulated Cholesterol Metabolism	1.13	0.375	ABR,LDLR,NR1H3
Cell Cycle: G2/M DNA Damage Checkpoint Regulation	1.12	0.213	CDKN2A,CDC25B,YWHAZ,PRKDC,TOP2A,YWHAB,KAT2B,CDKN1A,CDK1,BRCA1
Decreases Depolarization of Mitochondria and Mitochondrial Membrane	1	0.333	BCL2,ATP2A2,CAT
Increases Transmembrane Potential of Mitochondria and Mitochondrial Membrane	0.978	0.2	HSPA4,DNAJB1,ICAM1,BCL2,HERPUD1,CAT,MSRB2,PPARG,GSN,CFLAR
Nongenotoxic Hepatocarcinogenicity Biomarker Panel	0.834	0.227	MT1E,BTG2,CDKN1A,ICA1,ANXA2
Increases Renal Proliferation	0.811	0.168	SUMO1,NDUFAB1,CSDA,PTP4A1,CDKN1A,PTGES,CDK2,CSTF2,MT1E,THOC1,IGF1,JUN,ITGB1,PPP2R1A,PLAUR,MT1H,AVP
Hepatic Stellate Cell Activation	0.798	0.2	TGFBR3,TIMP1,IGF1,TGFBR2,KLF2,TGFA,HLA-C
Decreases Transmembrane Potential of Mitochondria and Mitochondrial Membrane	0.788	0.168	MAP2K4,CDKN2A,TCF3,BNIP3L,AGA,CD47,TNFRSF10B,MYC,HTT,BCL2,CAT,IFI6,CLIC4,UCP2,TGM2,BNIP3
Long-term Renal Injury Anti-oxidative Response Panel (Rat)	0.706	0.222	MT1E,CAT,MT1H,BLVRA
TR/RXR Activation	0.66	0.163	ME1,SLC2A1,MED1,AKT3,PFKP,LDLR,SREBF2,FASN,PIK3C3,NCOA1,SCARB1,UCP2,PIK3R3,TBL1XR1
Increases Cardiac Dysfunction	0.643	0.188	FKBP1A,CREM,SLC2A1,TGFBR2,MAP3K5,SCD
Increases Liver Steatosis	0.612	0.167	SLC27A5,TSC22D3,PNRC2,ARNT,MAP3K5,APOE,C3,CAV1,SCD,PPARG
Increases Permeability Transition of Mitochondria and Mitochondrial Membrane	0.556	0.25	CDKN2A,BIK
Glutathione Depletion - Hepatocellular Hypertrophy	0.556	0.25	GSR,POR
Swelling of Mitochondria	0.514	0.2	HTT,AIFM1,BCL2
VDR/RXR Activation	0.513	0.154	PRKCH,MED1,NCOA1,SERPINB1,VDR,TRPV6,CDKN1A,PRKD3,IGFBP6,IL12A,WT1,IGFBP3
Increases Cardiac Proliferation	0.462	0.162	NACA,IGF1,GNL3,PRKAR1A,RARA,MAP2K5
Fatty Acid Metabolism	0.43	0.143	CYP51A1,CYP1A1,ACAA1,AUH,HADHB,SRD5A1,GCDH,ACAT2,SLC27A5,ALDH3A2,HSD17B10,SLC27A3,ECHS1,HADHA,ACSL1,ACSL3,ACOX1
Renal Ischemic Resistance Panel (Rat)	0.422	0.2	LAMA1,FOXM1
Hepatic Cholestasis	0.392	0.139	MAP2K4,PRKCH,TNFRSF11B,IL1RAP,IKBKB,PRKAR1A,ADCY1,ADCY2,PRKAG2,NFKBIA,TJP2,SLC4A2,JUN,NGFR,PRKD3,RARA,FGFR4,INSR,NR1H3,MAP3K7
Increases Liver Damage	0.383	0.141	MED1,IGF1R,CDKN1A,SH3BP5,PTPN1,CTSB,C3,IFNGR1,SCARB1,EGR1,CD44,SMPD1,BNIP3
NF-κB Signaling	0.374	0.136	EIF2AK2,TNFRSF11B,UBE2V1,AKT3,DDR1,TNIP1,PIK3C3,NFKBIA,TGFBR2,MALT1,NRAS,TGFA,NGFR,PIK3R3,KRAS,INSR,MAP3K7,IKBKB,TNFAIP3,IGF1R,CSNK2B,FCER1G,TGFBR3,RRAS2,TANK,IGF2R,null,FGFR4
Protection from Hypoxia-induced Renal Ischemic Injury (Rat)	0.371	0.25	SLC2A1
Decreases Respiration of Mitochondria	0.37	0.182	MT1E,HTT
Increases Renal Damage	0.365	0.143	ADM,PARP1,ICAM1,MBL2,C3,SCARB1,MDK,ITGB1,CD44
FXR/RXR Activation	0.358	0.14	SLC27A5,MAP2K4,SLC4A2,APOE,AKT3,SCARB1,RARA,SDC1,PPARG,FGFR4,NR1H3,FASN
Increases Cardiac Dilation	0.356	0.154	JUND,TGFBR2,MAP3K5,BNIP3
Glutathione Depletion - CYP Induction and Reactive Metabolites	0.325	0.167	CCNG1,FKBP11
Glutathione Depletion - Phase II Reactions	0.31	0.15	MGST2,GSTO1,GSTM3
PXR/RXR Activation	0.294	0.134	PRKAG2,ALDH3A2,NR3C1,ALAS1,NCOA1,PRKAR1A,AKT3,SCD,INSR
Increases Renal Nephritis	0.274	0.135	PPP2CA,BCL2,LIF,IFNGR1,IRF5
Increases Glomerular Injury	0.255	0.136	SPARC,SMAD3,C3
Persistent Renal Ischemia-Reperfusion Injury (Mouse)	0.254	0.133	EMR1,C3,LOX,CTSS

## Sheet: S1c
Table S1c. List of canonical pathways associated with hPNPaseold-35 knockdown identified by IPA
Canonical Pathways	-log(p-value)	Ratio	Molecules
EIF2 Signaling	10.7	0.292	EIF2AK1,EIF2AK2,RPL7,EIF3I,RPS4X,AKT3,PIK3C3,RPL24,RPS19,RPL22,RPS17/RPS17L,NRAS,RPS15A,PIK3R3,INSR,RPL9,EIF3C/EIF3CL,EIF2B2,RPL30,MAPK1,EIF4G3,EIF2C1,RPL23A,RPS28,RPL18A,EIF3E,RPL3,RPL32,RPL18,GRB2,null,RPL35A,null,null,RPS15,PAIP1,null,MAP2K2,EIF3A,EIF4E,RPL15,RPS16,null,EIF5,RPS21,EIF3K,RPL11,KRAS,RPS2,RPL13A,RPS5,EIF4A2,RPL29,EIF2C2,SOS2,RPL13,RRAS2,RPS11,RPL28
Cholesterol Biosynthesis I	7.99	0.275	HSD17B7,CYP51A1,DHCR24,SC5DL,FDFT1,SQLE,EBP,MSMO1,DHCR7,LSS,NSDHL
Cholesterol Biosynthesis II (via 24,25-dihydrolanosterol)	7.99	0.275	HSD17B7,CYP51A1,DHCR24,SC5DL,FDFT1,SQLE,EBP,MSMO1,DHCR7,LSS,NSDHL
Cholesterol Biosynthesis III (via Desmosterol)	7.99	0.275	HSD17B7,CYP51A1,DHCR24,SC5DL,FDFT1,SQLE,EBP,MSMO1,DHCR7,LSS,NSDHL
Integrin Signaling	7.47	0.261	ACTN1,ARF3,TSPAN3,AKT3,ACTG2,RALA,ILK,PIK3C3,ARPC5L,CAPN2,RHOT1,NRAS,PIK3R3,CAV1,BCAR3,RALB,ITGA7,MAP2K4,CDC42,MAPK1,FNBP1,TSPAN4,RHOQ,NCK2,MPRIP,ITGA6,ITGB1,PAK2,GRB2,NEDD9,RHOC,ACTR2,MAP2K2,WASL,ARPC4,CAPN7,WIPF1,RAP2B,BRAF,CAPNS1,KRAS,RND3,SOS2,PTK2,ITGAV,RHOB,CAPN3,RRAS2,ACTN4,CTTN,RHOF,ILKAP,VASP,TSPAN7
Germ Cell-Sertoli Cell Junction Signaling	7.06	0.274	ACTN1,TUBB3,RHOC,LIMK2,WASL,MAP2K2,TUBB2A,TUBB,ILK,ACTG2,CTNNA1,PIK3C3,CTNND1,TGFBR2,MTMR2,MAP3K12,RHOT1,MAP2K3,NRAS,PIK3R3,TUBA4A,KRAS,TUBB4B,PPAP2B,MAP3K7,MAP2K4,RND3,TJP1,A2M,CDC42,MAP3K5,MAPK1,FNBP1,RHOQ,KEAP1,PTK2,RHOB,RRAS2,ITGA6,ACTN4,ITGB1,RHOF,PAK2,GSN,TUBB2B
mTOR Signaling	7.04	0.246	PRKCH,PPP2R1B,RPS4X,AKT3,EIF3I,PIK3C3,PPP2CA,RPS19,RHOT1,RPS17/RPS17L,NRAS,RPS15A,PIK3R3,INSR,EIF3C/EIF3CL,MAPK1,EIF4G3,FNBP1,RHOQ,PLD1,RPS28,RPS6KA2,PPP2R1A,EIF3E,FKBP1A,RHOC,RPS15,PPP2R3B,null,EIF3A,EIF4B,EIF4E,PRKAG2,RPS16,PPP2R5C,null,RPS21,EIF3K,KRAS,PRKD3,RPS2,RPS5,RPS6KA5,RND3,EIF4A2,RHEB,RHOB,STK11,RRAS2,RPS11,RHOF,PPP2R5A
Regulation of eIF4 and p70S6K Signaling	6.78	0.246	GRB2,PPP2R1B,null,RPS15,EIF3I,RPS4X,PPP2R3B,PAIP1,AKT3,null,MAP2K2,EIF3A,EIF4E,RPS16,PIK3C3,PPP2CA,RPS19,PPP2R5C,null,RPS17/RPS17L,RPS21,NRAS,EIF3K,RPS15A,PIK3R3,RPS2,KRAS,RPS5,EIF3C/EIF3CL,EIF4A2,EIF2B2,MAPK1,EIF4G3,EIF2C2,SOS2,EIF2C1,RRAS2,RPS28,PPP2R1A,ITGB1,PPP2R5A,RPS11,EIF3E
NRF2-mediated Oxidative Stress Response	6.67	0.255	PRKCH,TXNRD1,ACTG2,PIK3C3,UBE2K,FOS,NRAS,PIK3R3,NQO1,DNAJC4,MAP2K4,FOSL1,JUND,MAPK1,HSPB8,FTH1,KEAP1,DNAJC1,CLPP,NQO2,ERP29,STIP1,GSR,PMF1,SCARB1,HERPUD1,MAP2K2,DNAJC3,MAP2K5,DNAJB1,MAP2K3,AKR7A2,CAT,GSTO1,PRKD3,KRAS,PPIB,MAP3K7,ATF4,MAP3K5,PRDX1,SLC35A2,GSTM3,MGST2,RRAS2,FTL,JUN,DNAJC6,UBB
Huntington's Disease Signaling	6.29	0.232	PRKCH,GNA11,AKT3,STX16,ITPR1,CDK5R1,HSPA4,PIK3C3,CAPN2,HTT,HIP1,PIK3R3,ATF2,GNG5,ATP5B,MAP2K4,HDAC4,ZDHHC17,POLR2G,MAPK1,HSPA14,GLS,POLR2B,CREB1,DNM2,GOSR1,GRB2,POLR2I,CASP2,NAPA,YKT6,SDHB,RPH3A,CAPN7,IGF1,DNAJB1,CAPNS1,CREB3,PRKD3,CTSD,HSPA6,GOSR2,GNG11,ATF4,GNG4,IGF1R,SOS2,RASA1,CAPN3,JUN,HDAC9,GNB1,TGM2,UBB,SGK1
Actin Nucleation by ARP-WASP Complex	6.17	0.333	GRB2,RND3,RHOC,CDC42,FNBP1,ACTR2,WASL,ARPC4,SOS2,RHOQ,NCK2,RHOB,ARPC5L,WIPF1,RRAS2,BAIAP2,RHOT1,NRAS,ITGB1,RHOF,KRAS,VASP
Mitochondrial Dysfunction	5.37	0.215	NDUFA3,NDUFB7,BACE2,CYB5R3,UQCRFS1,PSEN2,SDHB,GLRX2,COX6B1,null,APH1B,NDUFAF1,ATP5A1,CAT,NDUFS2,COX7A1,NDUFS3,UCP2,ATP5B,MAP2K4,ATP5C1,NDUFAB1,NDUFA8,UQCR10,SDHC,SURF1,GPX4,TRAK1,UQCR11,GSR,NDUFS1,NDUFB5,NDUFA13,HSD17B10,AIFM1,PSENEN,PDHA1,NDUFA2
Neurotrophin/TRK Signaling	5.23	0.307	MAP2K4,GRB2,ATF4,MAP3K5,CDC42,PTPN11,MAPK1,MAP2K2,SOS2,MAP2K5,SPRY1,PIK3C3,RRAS2,FOS,JUN,CREB1,MAP2K3,NRAS,NGFR,ATF2,PIK3R3,CREB3,KRAS
HMGB1 Signaling	4.97	0.283	TNFRSF11B,RHOC,AKT3,MAP2K2,MAP2K5,PIK3C3,KAT6A,FOS,RHOT1,MAP2K3,NRAS,NGFR,PIK3R3,KRAS,MAP2K4,RND3,CDC42,ICAM1,MAPK1,FNBP1,KAT2B,RHOQ,IFNGR2,RHOB,RRAS2,JUN,IFNGR1,RHOF
Molecular Mechanisms of Cancer	4.96	0.191	CDKN2A,PRKCH,WNT5A,GNA11,PRKAR1A,TYK2,AKT3,ADCY1,CDKN1A,PSEN2,HIPK2,RALA,PIK3C3,CTNNA1,NFKBIA,MYC,TGFBR2,FOS,RHOT1,NRAS,ARHGEF18,PIK3R3,RALB,BRCA1,MAP2K4,NF1,BIRC2,CDC42,MAPK1,TCF3,FNBP1,CCNE2,RHOQ,TCF4,PAK2,GRB2,RHOC,ARHGEF4,RBPJ,MAP2K2,CFLAR,ADCY2,FZD6,PRKAG2,CDC25B,CTNND1,RAP2B,APH1B,MAP2K3,BRAF,BMP7,PRKD3,KRAS,MAP3K7,RND3,PRKDC,MAP3K5,SMAD3,PTPN11,CCND1,SOS2,RASA1,PTK2,CDK2,RHOB,RRAS2,JUN,BCL…
Glioma Invasiveness Signaling	4.79	0.333	RND3,RHOC,MAPK1,FNBP1,MMP2,RHOQ,PTK2,ITGAV,TIMP1,RHOB,PIK3C3,RRAS2,RHOT1,NRAS,TIMP2,RHOF,PLAUR,PIK3R3,CD44,KRAS
ILK Signaling	4.77	0.234	ACTN1,PPP2R1B,RHOC,TMSB10/TMSB4X,PPP2R3B,AKT3,ILK,ACTG2,DSP,PIK3C3,MYC,FOS,PPP2CA,PPP2R5C,RHOT1,KRT18,PIK3R3,ATF2,FERMT2,CREB3,PPAP2B,MAP2K4,RPS6KA5,RND3,SNAI2,CDC42,ATF4,MAPK1,FNBP1,CCND1,RHOQ,PTK2,MYL6B,NCK2,NACA,RHOB,FN1,JUN,CREB1,ACTN4,PPP2R1A,ITGB1,PPP2R5A,RHOF,ILKAP
IGF-1 Signaling	4.59	0.267	GRB2,PRKAR1A,AKT3,MAP2K2,PRKAG2,PIK3C3,IGF1,FOS,NRAS,SOCS2,PIK3R3,KRAS,IGFBP6,MAPK1,PTPN11,IGF1R,CSNK2B,CTGF,SOS2,SOCS1,PTK2,RASA1,RRAS2,YWHAZ,JUN,YWHAB,GRB10,IGFBP3
Breast Cancer Regulation by Stathmin1	4.4	0.217	GRB2,PRKCH,PPP2R1B,TUBB3,PRKAR1A,LIMK2,PPP2R3B,ARHGEF4,ADCY1,MAP2K2,CDKN1A,CDK1,RB1CC1,ITPR1,TUBB2A,TUBB,ADCY2,PRKAG2,CALM1 (includes others),PIK3C3,PPP2CA,PPP2R5C,ARHGEF18,NRAS,PIK3R3,TUBA4A,KRAS,PRKD3,TUBB4B,GNG5,GNG11,CDC42,MAPK1,GNG4,CCNE2,SOS2,ITPR3,CDK2,RRAS2,TSG101,E2F5,PPP2R1A,PPP2R5A,GNB1,TUBB2B
PI3K/AKT Signaling	4.16	0.222	GRB2,PPP2R1B,MCL1,TYK2,GYS1,PPP2R3B,AKT3,HSP90AB1,MAP2K2,CDKN1A,EIF4E,ILK,NFKBIA,PPP2CA,PPP2R5C,NRAS,PIK3R3,KRAS,RHEB,MAP3K5,IKBKB,MAPK1,CCND1,SOS2,CDC37,RRAS2,YWHAZ,BCL2,YWHAB,PPP2R1A,ITGB1,PPP2R5A
Rac Signaling	4.08	0.23	ACTR2,LIMK2,MAP2K2,PIP4K2A,ARPC4,CDK5R1,PIK3C3,ARPC5L,BAIAP2,NRAS,PIK3R3,CD44,KRAS,MAP2K4,PARD3,CYFIP2,CDC42,MAPK1,PTK2,PLD1,MCF2L,RRAS2,JUN,ABI2,TIAM1,PIP5K1A,ITGB1,PAK2
GNRH Signaling	4.02	0.218	DNM2,GRB2,PRKCH,GNA11,PRKAR1A,ADCY1,MAP2K2,ITPR1,ADCY2,PRKAG2,MAP3K12,FOS,MAP2K3,NRAS,ATF2,KRAS,PRKD3,EGR1,CREB3,MAP3K7,MAP2K4,ATF4,CDC42,MAP3K5,MAPK1,SOS2,ITPR3,PTK2,RRAS2,JUN,CREB1,PAK2
HGF Signaling	3.98	0.257	CDKN2A,GRB2,PRKCH,AKT3,MAP2K2,CDKN1A,PIK3C3,MAP3K12,FOS,NRAS,ATF2,PIK3R3,KRAS,PRKD3,MAP3K7,MAP2K4,CDC42,MAP3K5,MAPK1,PTPN11,CCND1,SOS2,CDK2,PTK2,ETS2,RRAS2,JUN
Protein Ubiquitination Pathway	3.81	0.201	USP18,PSMC2,UBE2V1,DNAJC2,PSMD12,HSPA4,PSMB4,HSPE1,PSMD2,BRCA1,HSPA13,DNAJC4,BIRC2,HLA-A,USP13,PSMA5,HSPB8,USP4,HSPA14,PSMA7,DNAJC1,CUL2,PSMD8,UBE2H,UBE2M,HLA-B,NEDD4L,USP1,USP24,PSMD6,CDC20,HSP90AB1,DNAJC3,UBE2L6,HSPH1,DNAJB1,ANAPC5,UBE3A,PSMD11,HSPA6,USP22,USP34,USP46,UBE3B,DNAJC22,UBE2I,PSMD4,PSMC4,PSMD9,HLA-C,UBE2D3,DNAJC6,UBB,UBE2A
Mitotic Roles of Polo-Like Kinase	3.76	0.29	PLK3,PPP2R1B,CDC20,PPP2R3B,HSP90AB1,PLK2,PTTG1,CDK1,CDC7,SMC3,CDC25B,PPP2CA,PPP2R5C,CDC27,ANAPC5,RAD21,PPP2R1A,PPP2R5A,PLK4,FBXO5
Estrogen-Dependent Breast Cancer Signaling	3.68	0.264	ATF4,MAPK1,IGF1R,AKT3,CCND1,HSD17B1,HSD17B7,PIK3C3,RRAS2,IGF1,FOS,JUN,CREB1,HSD17B10,NRAS,ATF2,PIK3R3,CREB3,KRAS
Cell Cycle Regulation by BTG Family Proteins	3.59	0.361	PPP2R1B,BTG2,CCNE2,PPP2R3B,CCND1,CDK2,PRMT1,PPP2CA,PPP2R5C,E2F5,PPP2R1A,BTG1,PPP2R5A
Ketolysis	3.56	0.333	null,BDH2,OXCT1,HADHA,HADHB,ACAT2
IL-8 Signaling	3.51	0.201	PRKCH,RHOC,MMP2,LIMK2,AKT3,MAP2K2,PIK3C3,FOS,RHOT1,NRAS,BRAF,PIK3R3,KRAS,PRKD3,GNG5,MAP2K4,RND3,GNG11,ICAM1,MAPK1,IKBKB,GNG4,FNBP1,RAB11FIP2,CCND1,RHOQ,PTK2,ITGAV,RHOB,HBEGF,CXCL1,RRAS2,PLD1,JUN,BCL2,GNB1,null,RHOF,PAK2,VASP,CCND3
Estrogen Receptor Signaling	3.51	0.228	GRB2,SMARCA4,POLR2I,SPEN,MED1,GTF2F1,MED13,MAP2K2,GTF2H1,TAF12,NCOA1,NRAS,KRAS,POLR2G,PRKDC,MED27,MAPK1,TAF2,MED4,MNAT1,TAF13,KAT2B,SOS2,TAF5,POLR2B,RBFOX2,RRAS2,NR3C1,HNRNPD,CTBP2,TAF7
Melanocyte Development and Pigmentation Signaling	3.51	0.253	GRB2,MC1R,RPS6KA5,ATF4,MAPK1,PTPN11,PRKAR1A,ADCY1,MAP2K2,SOS2,ADCY2,PRKAG2,PIK3C3,RRAS2,CREB1,BCL2,RPS6KA2,DCT,NRAS,ATF2,PIK3R3,CREB3,KRAS
Ceramide Signaling	3.49	0.25	MAP2K4,PPP2R1B,TNFRSF11B,AKT3,PPP2R3B,SPHK1,PIK3C3,RRAS2,PPP2CA,FOS,PPP2R5C,JUN,BCL2,NRAS,PPP2R1A,NGFR,PPP2R5A,PIK3R3,KRAS,SMPD1,NSMAF,CTSD
Cholecystokinin/Gastrin-mediated Signaling	3.42	0.245	GRB2,PRKCH,RHOC,MAP2K2,ITPR1,MAP2K5,FOS,RHOT1,NRAS,MAP2K3,ATF2,PRKD3,KRAS,MAP2K4,RND3,MAPK1,FNBP1,SOS2,RHOQ,ITPR3,PTK2,RHOB,RRAS2,CREM,JUN,RHOF
Renal Cell Carcinoma Signaling	3.39	0.27	GRB2,SLC2A1,CDC42,PTPN11,MAPK1,AKT3,MAP2K2,SOS2,CUL2,PIK3C3,RRAS2,FOS,JUN,ARNT,NRAS,TGFA,PIK3R3,UBB,PAK2,KRAS
Amyloid Processing	3.31	0.286	MAPK1,CSNK2B,BACE2,PRKAR1A,MAPT,AKT3,CSNK1A1,PSEN2,CDK5R1,CAPN7,CAPN3,PRKAG2,CAPN2,APH1B,PSENEN,CAPNS1
CDK5 Signaling	3.27	0.245	LAMA1,PPP2R1B,MAPK1,PRKAR1A,MAPT,PPP2R3B,ADCY1,MAP2K2,LAMA5,CDK5R1,ADCY2,PRKAG2,RRAS2,PPP2CA,PPP2R5C,ITGA6,NRAS,ITGB1,PPP2R1A,NGFR,PPP2R5A,EGR1,KRAS
Prostate Cancer Signaling	3.25	0.224	GRB2,ATF4,MAPK1,AKT3,CCNE2,CCND1,MAP2K2,HSP90AB1,CDKN1A,SRD5A1,SOS2,CDK2,PIK3C3,NFKBIA,RRAS2,CREB1,BCL2,NRAS,ATF2,PIK3R3,CREB3,KRAS
Type I Diabetes Mellitus Signaling	3.24	0.223	HLA-G,HLA-F,TNFRSF11B,ICA1,IL12A,NFKBIA,HLA-DQB1,MAP2K3,SOCS2,NGFR,MAP3K7,MAP2K4,MAP3K5,HLA-A,HLA-E,IKBKB,MAPK1,IL1RAP,SOCS1,HLA-DRA,IFNGR2,FCER1G,HLA-DRB1,BCL2,IFNGR1,HLA-C,HLA-B
p53 Signaling	3.22	0.25	CDKN2A,CCNG1,SNAI2,PRKDC,MED1,AKT3,CCND1,KAT2B,CDKN1A,GADD45B,CDK2,TNFRSF10B,HIPK2,PIK3C3,SERPINE2,DRAM1,GNL3,ADCK3,JUN,BCL2,TOPBP1,PIK3R3,BRCA1,WT1
JAK/Stat Signaling	3.2	0.271	GRB2,PTPN11,MAPK1,TYK2,AKT3,MAP2K2,CDKN1A,SOS2,SOCS1,PIK3C3,PIAS4,RRAS2,PTPN1,FOS,PIAS3,NRAS,SOCS2,PIK3R3,KRAS
Pyridoxal 5'-phosphate Salvage Pathway	3.2	0.25	MAP2K4,PRPF4B,EIF2AK2,PRKCH,MAPK1,PNPO,LIMK2,MAP2K2,CDK1,CDK2,CSNK1A1,GRK5,null,MAP2K3,BRAF,PAK2,GRK6,SGK1
LPS-stimulated MAPK Signaling	3.13	0.244	MAP2K4,PRKCH,MAP3K5,CDC42,MAPK1,IKBKB,MAP2K2,PIK3C3,NFKBIA,RRAS2,FOS,JUN,CREB1,MAP2K3,NRAS,ATF2,PIK3R3,PRKD3,KRAS,MAP3K7
ERK5 Signaling	3.11	0.277	FOSL1,RPS6KA5,ATF4,PTPN11,MAP2K5,MYC,RRAS2,YWHAZ,FOS,CREB1,RPS6KA2,NRAS,LIF,YWHAB,ATF2,CREB3,KRAS,SGK1
CXCR4 Signaling	3.1	0.204	PRKCH,RHOC,GNA11,AKT3,ADCY1,MAP2K2,ITPR1,ADCY2,PIK3C3,FOS,RHOT1,NRAS,PIK3R3,KRAS,PRKD3,EGR1,GNG5,MAP2K4,RND3,GNG11,MAPK1,GNG4,FNBP1,RHOQ,ITPR3,PTK2,MYL6B,RHOB,RRAS2,JUN,ELMO2,GNB1,RHOF,PAK2
NGF Signaling	3.08	0.22	GRB2,AKT3,MAP2K2,PIK3C3,MAP3K12,NRAS,NGFR,ATF2,PIK3R3,KRAS,CREB3,SMPD1,MAP3K7,MAP2K4,RPS6KA5,CDC42,MAP3K5,ATF4,IKBKB,MAPK1,PTPN11,SOS2,RRAS2,CREB1,RPS6KA2,TRIO
Mevalonate Pathway I	3.04	0.25	HADHA,HADHB,IDI1,HMGCR,ACAT2,HMGCS1,MVD
Glucocorticoid Receptor Signaling	3.03	0.177	TSC22D3,SMARCA4,GTF2F1,MED1,AKT3,CDKN1A,CHP1,HSPA4,NFKBIA,PIK3C3,TGFBR2,FOS,NCOA1,NRAS,PIK3R3,MAP2K4,POLR2G,A2M,MAPK1,HSPA14,TAF13,MNAT1,POLR2B,CREB1,SUMO1,GRB2,POLR2I,MAP2K2,HSP90AB1,GTF2H1,NFATC1,PRKAG2,TAF12,KRAS,HSPA6,MAP3K7,ICAM1,SMAD3,IKBKB,TAF2,KAT2B,UBE2I,SOS2,TAF5,PPP3CA,RRAS2,NR3C1,JUN,BCL2,TSG101,TAF7,SGK1
Sertoli Cell-Sertoli Cell Junction Signaling	3.02	0.195	ACTN1,TUBB3,PRKAR1A,AKT3,MAP2K2,TUBB2A,TUBB,PRKAG2,ILK,ACTG2,CTNNA1,MTMR2,MAP3K12,MAP2K3,NRAS,ATF2,TUBA4A,KRAS,TUBB4B,PPAP2B,MAP3K7,MAP2K4,TJP1,A2M,CDC42,MAP3K5,MAPK1,CSDA,KEAP1,DLG1,TGFBR3,RRAS2,TJP2,JUN,ACTN4,ITGB1,SPTBN1,TUBB2B
Hypoxia Signaling in the Cardiovascular System	2.93	0.273	SUMO1,ATF4,UBE2V1,UBE2I,HSP90AB1,UBE2L6,LDHA,UBE2H,NFKBIA,UBE2M,ARNT,JUN,CREB1,UBE2D3,ATF2,CREB3,NQO1,UBE2A
Ketogenesis	2.92	0.286	BDH2,HMGCL,HADHA,HADHB,ACAT2,HMGCS1
Regulation of Actin-based Motility by Rho	2.84	0.236	RND3,RHOC,CDC42,FNBP1,ACTR2,WASL,PIP4K2A,ARPC4,RHOQ,MYL6B,ACTG2,RHOB,ARPC5L,MPRIP,WIPF1,BAIAP2,RHOT1,PIP5K1A,RHOF,PAK2,GSN
Signaling by Rho Family GTPases	2.83	0.183	RHOC,GNA11,ACTR2,LIMK2,ARHGEF4,MAP2K2,WASL,PIP4K2A,ARPC4,SEPT7,ACTG2,ARPC5L,PIK3C3,WIPF1,MAP3K12,FOS,BAIAP2,RHOT1,ARHGEF18,RDX,SEPT6,PIK3R3,EZR,GNG5,MAP2K4,PARD3,RND3,GNG11,CDC42,MAPK1,GNG4,FNBP1,RHOQ,PTK2,MYL6B,SEPT4,RHOB,PLD1,JUN,PIP5K1A,CDC42EP3,ITGB1,GNB1,RHOF,CLIP1,PAK2
G Beta Gamma Signaling	2.81	0.19	DNM2,GRB2,PRKCH,GNG11,CDC42,GNG4,MAPK1,GNA11,PRKAR1A,AKT3,ADCY1,SOS2,ADCY2,PRKAG2,HBEGF,RRAS2,NRAS,GNB1,PRKD3,CAV1,KRAS,GNG5
GADD45 Signaling	2.8	0.364	CCND1,CCNE2,CDKN1A,GADD45B,CDK1,BRCA1,CDK2,CCND3
IL-6 Signaling	2.8	0.218	GRB2,TNFRSF11B,MCL1,AKT3,MAP2K2,PIK3C3,NFKBIA,FOS,MAP2K3,NRAS,NGFR,PIK3R3,KRAS,MAP3K7,MAP2K4,A2M,IKBKB,MAPK1,IL1RAP,PTPN11,CSNK2B,SOS2,SOCS1,RRAS2,MAPKAPK2,JUN,null
Chronic Myeloid Leukemia Signaling	2.77	0.219	CDKN2A,HDAC4,GRB2,RBL2,PTPN11,IKBKB,MAPK1,SMAD3,AKT3,CCND1,MAP2K2,CDKN1A,SOS2,PIK3C3,RRAS2,MYC,TGFBR2,CTBP2,HDAC9,NRAS,E2F5,PIK3R3,KRAS
SAPK/JNK Signaling	2.77	0.225	MAP2K4,GRB2,GNG11,MAP3K5,CDC42,DUSP10,SOS2,FCER1G,NFATC1,PIK3C3,RRAS2,MAP3K12,JUN,MAP4K3,NRAS,null,ATF2,GNB1,PIK3R3,KRAS,DUSP4,GNG5,MAP3K7
Antigen Presentation Pathway	2.76	0.3	HLA-F,CANX,HLA-G,HLA-DRB4,HLA-E,HLA-A,HLA-DRB1,CD74,HLA-C,HLA-DPA1,HLA-B,HLA-DRA
Glioblastoma Multiforme Signaling	2.75	0.195	CDKN2A,GRB2,WNT5A,RHOC,AKT3,MAP2K2,CDKN1A,ITPR1,FZD6,PIK3C3,IGF1,MYC,RHOT1,NRAS,PIK3R3,KRAS,NF1,RND3,CDC42,MAPK1,IGF1R,TCF3,FNBP1,CCND1,SOS2,RHOQ,ITPR3,CDK2,RHOB,RRAS2,E2F5,RHOF
Phospholipase C Signaling	2.75	0.177	GRB2,PEBP1,PRKCH,RHOC,ARHGEF4,ADCY1,MAP2K2,ITPR1,NFATC1,CHP1,ADCY2,RALA,CALM1 (includes others),RHOT1,ARHGEF18,NRAS,ATF2,CREB3,KRAS,PRKD3,RALB,GNG5,HDAC4,RND3,GNG11,ATF4,MAPK1,GNG4,FNBP1,RHOQ,SOS2,ITPR3,MYL6B,PPP3CA,FCER1G,RHOB,RRAS2,PLD1,MPRIP,CREB1,AHNAK,HDAC9,ITGB1,TGM2,GNB1,RHOF
GDNF Family Ligand-Receptor Interactions	2.69	0.247	MAP2K4,GRB2,CDC42,MAPK1,MAP2K2,SOS2,PDLIM7,ITPR3,RASA1,ITPR1,PIK3C3,RRAS2,FOS,JUN,CREB1,NRAS,PIK3R3,KRAS
Regulation of IL-2 Expression in Activated and Anergic T Lymphocytes	2.67	0.225	MAP2K4,GRB2,IKBKB,MAPK1,SMAD3,TOB1,MAP2K2,SOS2,PPP3CA,CHP1,NFATC1,NFKBIA,CALM1 (includes others),RRAS2,TGFBR2,FOS,JUN,MALT1,NRAS,KRAS
CD40 Signaling	2.67	0.243	MAP2K4,ICAM1,MAPK1,IKBKB,TNFAIP3,MAP2K2,MAP2K5,NFKBIA,PIK3C3,MAPKAPK2,FOS,JUN,MAP2K3,TRAF1,TANK,PIK3R3,MAP3K7
Myc Mediated Apoptosis Signaling	2.65	0.267	MAP2K4,CDKN2A,GRB2,IGF1R,AKT3,SOS2,PIK3C3,MYC,RRAS2,IGF1,YWHAZ,BCL2,NRAS,YWHAB,PIK3R3,KRAS
Cdc42 Signaling	2.65	0.192	HLA-G,HLA-F,HLA-DRB4,ACTR2,CDC42BPA,LIMK2,WASL,ARPC4,RALA,ARPC5L,WIPF1,FOS,BAIAP2,HLA-DQB1,ATF2,MAP2K4,PARD3,HLA-E,CDC42,HLA-A,MAPK1,HLA-DRA,RASA1,MYL6B,FCER1G,MPRIP,JUN,HLA-DRB1,HLA-C,HLA-DPA1,HLA-B,ITGB1,CLIP1,PAK2
IL-2 Signaling	2.64	0.259	GRB2,MAPK1,PTPN11,CSNK2B,AKT3,MAP2K2,SOS2,SOCS1,PIK3C3,RRAS2,FOS,JUN,NRAS,PIK3R3,KRAS
Gap Junction Signaling	2.6	0.188	GRB2,PRKCH,TUBB3,PRKAR1A,AKT3,ADCY1,MAP2K2,MAP2K5,SP3,CSNK1A1,ITPR1,TUBB2A,TUBB,ADCY2,PRKAG2,ACTG2,PIK3C3,NRAS,PIK3R3,TUBA4A,CAV1,KRAS,PRKD3,TUBB4B,MAPK1,DBN1,SOS2,CSNK1G2,CSNK1G3,ITPR3,PPP3CA,RRAS2,TUBB2B
α-Adrenergic Signaling	2.57	0.202	PRKCH,GNG11,GNG4,MAPK1,PYGB,PHKA2,PRKAR1A,GYS1,ADCY1,MAP2K2,ITPR3,ITPR1,ADCY2,PRKAG2,CALM1 (includes others),RRAS2,NRAS,GNB1,PRKD3,KRAS,GNG5
ATM Signaling	2.57	0.262	MAP2K4,TRIM28,ATF4,GADD45B,CDKN1A,CDK1,CDK2,SMC3,RAD51,CBX5,NFKBIA,JUN,CREB1,ATF2,CREB3,BRCA1
Role of NFAT in Cardiac Hypertrophy	2.56	0.179	GRB2,RCAN1,PRKCH,PRKAR1A,AKT3,ADCY1,MAP2K2,CSNK1A1,ITPR1,ADCY2,CHP1,PRKAG2,IL11,CALM1 (includes others),PIK3C3,IGF1,TGFBR2,MAP2K3,LIF,NRAS,PIK3R3,KRAS,PRKD3,GNG5,MAP3K7,MAP2K4,HDAC4,GNG11,MAPK1,GNG4,IGF1R,SOS2,ITPR3,PPP3CA,RRAS2,HDAC9,GNB1
CD28 Signaling in T Helper Cells	2.48	0.197	GRB2,ACTR2,AKT3,MAP2K2,ARPC4,ITPR1,CHP1,NFATC1,PIK3C3,NFKBIA,ARPC5L,CALM1 (includes others),FOS,HLA-DQB1,MALT1,PIK3R3,MAP2K4,CDC42,IKBKB,PTPN11,ITPR3,HLA-DRA,PPP3CA,FCER1G,JUN,HLA-DRB1
Fatty Acid β-oxidation I	2.48	0.222	SLC27A5,ACAA1,HSD17B10,SLC27A3,AUH,ECHS1,ACSL1,HADHA,HADHB,ACSL3
Zymosterol Biosynthesis	2.47	0.182	HSD17B7,CYP51A1,MSMO1,NSDHL
Protein Kinase A Signaling	2.44	0.169	PRKCH,PYGB,PRKAR1A,PTPRK,GYS1,ADCY1,ITPR1,CHP1,NFKBIA,TGFBR2,PTPN2,AKAP8,PTPN1,DUSP7,AKAP2/PALM2-AKAP2,ATF2,NGFR,PDE9A,DUSP4,GNG5,MAPK1,PDE8A,PHKA2,TCF3,PDE4B,PTP4A1,TCF4,PDE4A,PTPRF,CREM,DUSP3,CREB1,PTPRE,AKAP10,PTP4A2,TNNI3,MAP2K2,PTPLA,PTPN13,NFATC1,ADCY2,PRKAG2,CALM1 (includes others),KDELR2,CDC25B,PDE4D,CDC27,ANAPC5,PTPRO,BRAF,CREB3,PRKD3,GNG11,ATF4,GNG4,SMAD3,PTPN11,HIST1H1C,DUSP10,CDKN3,IT…
RAN Signaling	2.44	0.292	TNPO1,IPO5,KPNA2,KPNA6,KPNA1,KPNB1,KPNA3
Apoptosis Signaling	2.44	0.221	MAP2K4,PARP1,BIRC2,MAP3K5,MCL1,MAPK1,IKBKB,CASP2,MAP2K2,CDK1,CAPN7,CAPN3,NFKBIA,RRAS2,CAPN2,AIFM1,BCL2,NRAS,null,KRAS,CAPNS1
Thyroid Cancer Signaling	2.44	0.286	TCF4,CXCL1,RRAS2,MYC,MAPK1,TCF3,NRAS,CCND1,BRAF,MAP2K2,KRAS,PPARG
Androgen Signaling	2.44	0.175	PRKCH,GTF2F1,POLR2I,GNA11,PRKAR1A,GTF2H1,PRKAG2,HSPA4,CALM1 (includes others),DNAJB1,NCOA1,PRKD3,GNG5,GNG11,POLR2G,TAF2,GNG4,SMAD3,MAPK1,CCND1,MNAT1,KAT2B,POLR2B,JUN,GNB1
Acute Myeloid Leukemia Signaling	2.43	0.232	MAP2K4,GRB2,MAPK1,TCF3,AKT3,CCND1,MAP2K2,SOS2,MAP2K5,TCF4,PIK3C3,MYC,RRAS2,MAP2K3,NRAS,BRAF,PIK3R3,RARA,KRAS
PDGF Signaling	2.43	0.224	MAP2K4,GRB2,EIF2AK2,MAPK1,CSNK2B,TYK2,SPHK1,MAP2K2,SOS2,RASA1,PIK3C3,MYC,RRAS2,FOS,JUN,NRAS,PIK3R3,CAV1,KRAS
PPAR Signaling	2.42	0.21	GRB2,TNFRSF11B,MED1,IL1RAP,MAPK1,IKBKB,MAP2K2,HSP90AB1,SOS2,NFKBIA,RRAS2,FOS,JUN,NCOA1,NRAS,NGFR,null,PPARG,KRAS,INSR,MAP3K7,NR1H3
Cardiac Hypertrophy Signaling	2.41	0.177	GRB2,RHOC,GNA11,PRKAR1A,ADCY1,MAP2K2,EIF4E,CHP1,ADCY2,PRKAG2,CALM1 (includes others),PIK3C3,IGF1,TGFBR2,MAP3K12,RHOT1,MAP2K3,NRAS,CACNA1D,PIK3R3,ATF2,KRAS,GNG5,MAP3K7,MAP2K4,RND3,GNG11,EIF2B2,MAP3K5,MAPK1,GNG4,IGF1R,FNBP1,RHOQ,MYL6B,PPP3CA,RHOB,RRAS2,MAPKAPK2,JUN,CREB1,GNB1,RHOF
Telomerase Signaling	2.4	0.223	TPP1,HDAC4,GRB2,PPP2R1B,MAPK1,AKT3,PPP2R3B,MAP2K2,HSP90AB1,CDKN1A,SOS2,PIK3C3,ETS2,RRAS2,MYC,PPP2CA,PPP2R5C,HDAC9,NRAS,PPP2R1A,PPP2R5A,PIK3R3,KRAS
TGF-β Signaling	2.4	0.225	MAP2K4,GRB2,MAPK1,SMAD3,VDR,MAP2K2,SOS2,TGIF1,PIAS4,TGFBR2,RRAS2,FOS,JUN,RUNX3,BCL2,MAP2K3,NRAS,BMP7,KRAS,MAP3K7
Production of Nitric Oxide and Reactive Oxygen Species in Macrophages	2.35	0.171	PRKCH,PPP2R1B,TNFRSF11B,RHOC,TYK2,PPP2R3B,AKT3,NFKBIA,PIK3C3,MAP3K12,FOS,CYBA,PPP2CA,PPP2R5C,RHOT1,CAT,PIK3R3,NGFR,PRKD3,MAP3K7,MAP2K4,RND3,MAP3K5,IKBKB,MAPK1,FNBP1,RHOQ,IFNGR2,RHOB,APOC1,JUN,APOE,IFNGR1,PPP2R1A,RHOF,PPP2R5A
Ephrin Receptor Signaling	2.34	0.175	GRB2,GNA11,ACTR2,LIMK2,AKT3,WASL,MAP2K2,PTPN13,ARPC4,ABI1,ARPC5L,WIPF1,SDCBP,SDC2,NRAS,ATF2,CREB3,KRAS,GNG5,GNG11,CDC42,ATF4,PTPN11,MAPK1,GNG4,SOS2,PTK2,RASA1,NCK2,RRAS2,CREB1,ITGB1,GNB1,null,PAK2
3-phosphoinositide Degradation	2.34	0.222	PTPRF,MTMR14,PTPN1,INPP4B,PTPN11,PTPRO,ITPK1,MTMR1,PTPN13,PPM1F,INPP4A,PPP3CA
14-3-3-mediated Signaling	2.33	0.214	GRB2,PRKCH,TUBB3,AKT3,MAPT,MAP2K2,TUBB2A,TUBB,PIK3C3,FOS,NRAS,TUBA4A,PIK3R3,PRKD3,KRAS,TUBB4B,MAP2K4,MAP3K5,MAPK1,RRAS2,YWHAZ,PDCD6IP,JUN,YWHAB,TUBB2B
Prolactin Signaling	2.33	0.225	GRB2,PRKCH,PTPN11,MAPK1,MAP2K2,SOS2,SOCS1,PIK3C3,MYC,RRAS2,NR3C1,FOS,JUN,NRAS,SOCS2,PIK3R3,PRKD3,KRAS
PTEN Signaling	2.32	0.193	GRB2,AKT3,DDR1,MAP2K2,CDKN1A,ILK,TGFBR2,NRAS,NGFR,PIK3R3,KRAS,INSR,CDC42,IKBKB,MAPK1,IGF1R,CSNK2B,CCND1,SOS2,PTK2,TGFBR3,RRAS2,BCL2,ITGB1,IGF2R,FGFR4
fMLP Signaling in Neutrophils	2.28	0.188	PRKCH,GNG11,CDC42,GNG4,MAPK1,ACTR2,MAP2K2,ARPC4,ITPR3,ITPR1,PPP3CA,CHP1,NFATC1,PIK3C3,NFKBIA,ARPC5L,CALM1 (includes others),RRAS2,NRAS,GNB1,PIK3R3,PRKD3,KRAS,GNG5
Renin-Angiotensin Signaling	2.28	0.192	MAP2K4,GRB2,PRKCH,MAPK1,PRKAR1A,ADCY1,MAP2K2,SOS2,ITPR3,ITPR1,PTK2,ADCY2,PRKAG2,PIK3C3,RRAS2,FOS,JUN,NRAS,SHC3,ATF2,PIK3R3,PRKD3,PAK2,KRAS
Endometrial Cancer Signaling	2.28	0.246	GRB2,MAPK1,AKT3,CCND1,MAP2K2,SOS2,ILK,CTNNA1,PIK3C3,MYC,RRAS2,NRAS,PIK3R3,KRAS
ErbB Signaling	2.28	0.23	MAP2K4,GRB2,PRKCH,CDC42,MAPK1,MAP2K2,SOS2,NCK2,PIK3C3,HBEGF,RRAS2,FOS,JUN,MAP2K3,NRAS,TGFA,PIK3R3,PRKD3,PAK2,KRAS
FLT3 Signaling in Hematopoietic Progenitor Cells	2.26	0.237	GRB2,RPS6KA5,ATF4,MAPK1,PTPN11,AKT3,MAP2K2,SOS2,EIF4E,PIK3C3,RRAS2,CREB1,RPS6KA2,NRAS,ATF2,PIK3R3,CREB3,KRAS
Melanoma Signaling	2.25	0.261	CDKN2A,PIK3C3,RRAS2,MAPK1,NRAS,CCND1,AKT3,BRAF,MAP2K2,CDKN1A,PIK3R3,KRAS
Role of NFAT in Regulation of the Immune Response	2.21	0.173	GRB2,RCAN1,GNA11,AKT3,MAP2K2,CSNK1A1,ITPR1,CHP1,NFATC1,CALM1 (includes others),NFKBIA,PIK3C3,FOS,HLA-DQB1,NRAS,PIK3R3,ATF2,KRAS,GNG5,GNG11,IKBKB,MAPK1,GNG4,SOS2,CSNK1G2,CSNK1G3,ITPR3,HLA-DRA,PPP3CA,FCER1G,RRAS2,JUN,HLA-DRB1,GNB1
D-myo-inositol (1,4,5,6)-Tetrakisphosphate Biosynthesis	2.2	0.229	PTPRF,PTPN1,PTPN11,PTPRO,ITPK1,PTPN13,PPM1F,PPP3CA
D-myo-inositol (3,4,5,6)-tetrakisphosphate Biosynthesis	2.2	0.229	PTPRF,PTPN1,PTPN11,PTPRO,ITPK1,PTPN13,PPM1F,PPP3CA
Type II Diabetes Mellitus Signaling	2.18	0.155	ADIPOR1,PRKCH,TNFRSF11B,AKT3,PRKAG2,PIK3C3,NFKBIA,SLC27A3,NGFR,SOCS2,PIK3R3,PRKD3,PPARG,SMPD1,INSR,MAP3K7,NSMAF,MAP2K4,MAP3K5,IKBKB,MAPK1,SOCS1,SLC27A5,ACSL1,ACSL3
TNFR2 Signaling	2.16	0.273	MAP2K4,NFKBIA,FOS,BIRC2,JUN,IKBKB,TNFAIP3,TRAF1,TANK
HER-2 Signaling in Breast Cancer	2.13	0.225	PARD3,GRB2,PRKCH,MAP3K5,CDC42,AKT3,CCNE2,MMP2,CCND1,CDKN1A,SOS2,PIK3C3,RRAS2,NRAS,ITGB1,PIK3R3,PRKD3,KRAS
Non-Small Cell Lung Cancer Signaling	2.12	0.203	CDKN2A,GRB2,MAPK1,AKT3,CCND1,MAP2K2,SOS2,ITPR3,ITPR1,PIK3C3,RRAS2,FHIT,NRAS,TGFA,PIK3R3,KRAS
Neuregulin Signaling	2.1	0.196	GRB2,PRKCH,PTPN11,MAPK1,AKT3,MAP2K2,HSP90AB1,SOS2,CDK5R1,HBEGF,MYC,RRAS2,ERBB2IP,null,NRAS,TGFA,ITGB1,PIK3R3,PRKD3,KRAS
PPARα/RXRα Activation	2.08	0.179	GRB2,ADIPOR1,MED1,GNA11,PRKAR1A,TGS1,ADCY1,HSP90AB1,MAP2K2,ADCY2,PRKAG2,NFKBIA,TGFBR2,MAP2K3,GK,NRAS,CKAP5,KRAS,INSR,MAP3K7,ACOX1,MAP2K4,ACAA1,IKBKB,SMAD3,MAPK1,IL1RAP,SOS2,FASN,TGFBR3,RRAS2,JUN,null
Isoleucine Degradation I	2.08	0.2	HSD17B10,AUH,ECHS1,HADHA,HADHB,ACAT2
ERK/MAPK Signaling	2.08	0.175	GRB2,PPP2R1B,PRKAR1A,PPP2R3B,MAP2K2,EIF4E,NFATC1,PRKAG2,PIK3C3,MYC,FOS,PPP2CA,PPP2R5C,NRAS,BRAF,PIK3R3,ATF2,KRAS,PPARG,CREB3,DUSP4,MKNK2,RPS6KA5,ATF4,MAPK1,SOS2,PTK2,ETS2,RRAS2,YWHAZ,CREB1,YWHAB,PPP2R1A,ITGB1,PPP2R5A,PAK2
Glutaryl-CoA Degradation	2.07	0.208	HSD17B10,HADHA,HADHB,GCDH,ACAT2
Thrombopoietin Signaling	2.05	0.222	GRB2,PRKCH,MAPK1,PTPN11,MAP2K2,PIK3C3,MYC,RRAS2,FOS,JUN,NRAS,PIK3R3,PRKD3,KRAS
Interferon Signaling	2.05	0.278	IFITM1,PTPN2,MX1,BCL2,IFI35,TYK2,IFNGR1,IFNAR2,SOCS1,IFNGR2
Virus Entry via Endocytic Pathways	2.05	0.202	DNM2,CD55,PRKCH,HLA-A,CDC42,AP2S1,AP1G2,CLTB,ACTG2,PIK3C3,RRAS2,ITGA6,NRAS,HLA-C,HLA-B,ITGB1,PIK3R3,PRKD3,CAV1,KRAS
Glioma Signaling	2.04	0.188	CDKN2A,GRB2,PRKCH,RBL2,MAPK1,IGF1R,AKT3,CCND1,MAP2K2,CDKN1A,SOS2,PIK3C3,CALM1 (includes others),RRAS2,IGF1,NRAS,E2F5,IGF2R,PIK3R3,PRKD3,KRAS
P2Y Purigenic Receptor Signaling Pathway	2.03	0.181	PRKCH,PRKAR1A,AKT3,MAP2K2,ADCY1,ADCY2,PRKAG2,PIK3C3,MYC,FOS,NRAS,ATF2,PIK3R3,PRKD3,KRAS,CREB3,GNG5,GNG11,ATF4,GNG4,MAPK1,RRAS2,JUN,CREB1,GNB1
Pancreatic Adenocarcinoma Signaling	2.03	0.192	MAP2K4,CDKN2A,GRB2,CDC42,MAPK1,SMAD3,TYK2,AKT3,CCND1,MAP2K2,CDKN1A,CDK2,RAD51,RALA,PIK3C3,HBEGF,TGFBR2,PLD1,BCL2,TGFA,E2F5,PIK3R3,KRAS
AMPK Signaling	1.99	0.163	SMARCA4,PPP2R1B,PRKAR1A,AKT3,GYS1,PPP2R3B,PFKP,PRKAG2,PIK3C3,PPP2CA,PPP2R5C,MAP2K3,PIK3R3,HMGCR,INSR,AK1,MAPK1,KAT2B,AK4,AK2,FASN,PFKFB3,STK11,ACACB,PPM1G,PPP2R1A,PPP2R5A
Erythropoietin Signaling	1.99	0.205	GRB2,PRKCH,MAPK1,AKT3,MAP2K2,SOS2,SOCS1,NFKBIA,PIK3C3,RRAS2,FOS,JUN,NRAS,PIK3R3,PRKD3,KRAS
Neuroprotective Role of THOP1 in Alzheimer's Disease	1.97	0.204	HLA-F,HLA-G,PRKAG2,HLA-E,HLA-A,CREB1,PRKAR1A,NFYA,MAPT,HLA-C,HLA-B
Aryl Hydrocarbon Receptor Signaling	1.96	0.174	CDKN2A,SMARCA4,CYP1A1,MED1,HSP90AB1,CDKN1A,ALDH3A2,MYC,ALDH6A1,FOS,ARNT,GSTO1,NQO1,CTSD,MAPK1,CCND1,CCNE2,SLC35A2,NFIB,CDK2,GSTM3,NQO2,MGST2,JUN,DCT,TGM2,RARA,CCND3
Calcium-induced T Lymphocyte Apoptosis	1.95	0.214	PRKCH,ATP2A2,ITPR3,ITPR1,HLA-DRA,PPP3CA,CHP1,FCER1G,CALM1 (includes others),ATP2A3,CAPN2,HLA-DRB1,HLA-DQB1,PRKD3,NR4A1
Role of Tissue Factor in Cancer	1.93	0.202	RPS6KA5,CDC42,PTPN11,MAPK1,GNA11,CTGF,AKT3,LIMK2,EIF4E,ITGAV,PIK3C3,CXCL1,HBEGF,RRAS2,ITGA6,RPS6KA2,NRAS,ITGB1,PIK3R3,F3,PLAUR,EGR1,KRAS
EGF Signaling	1.91	0.231	MAP2K4,GRB2,PIK3C3,FOS,JUN,MAPK1,CSNK2B,SOS2,PIK3R3,ITPR3,RASA1,ITPR1
B Cell Receptor Signaling	1.9	0.182	GRB2,AKT3,MAP2K2,NFATC1,CALM1 (includes others),PIK3C3,NFKBIA,MAP3K12,MALT1,MAP2K3,NRAS,ATF2,PIK3R3,KRAS,EGR1,CREB3,BCL6,MAP3K7,MAP2K4,CDC42,MAP3K5,ATF4,PTPN11,IKBKB,MAPK1,SOS2,PPP3CA,RRAS2,JUN,CREB1
FAK Signaling	1.89	0.188	GRB2,MAPK1,AKT3,MAP2K2,SOS2,PTK2,CAPN7,CAPN3,ACTG2,PIK3C3,RRAS2,CAPN2,NRAS,ITGB1,PIK3R3,PAK2,KRAS,CAPNS1,GIT2
Hereditary Breast Cancer Signaling	1.89	0.188	HDAC4,SMARCA4,POLR2G,RFC3,POLR2I,NPM1,AKT3,CCND1,CDKN1A,GADD45B,CDK1,POLR2B,RAD51,PIK3C3,RRAS2,FANCG,PALB2,HDAC9,NRAS,XPC,PIK3R3,UBB,KRAS,BRCA1
PKCθ Signaling in T Lymphocytes	1.89	0.168	MAP2K4,GRB2,MAP3K5,IKBKB,MAPK1,SOS2,HLA-DRA,PPP3CA,FCER1G,CHP1,NFATC1,PIK3C3,NFKBIA,RRAS2,MAP3K12,FOS,JUN,HLA-DRB1,MALT1,HLA-DQB1,NRAS,PIK3R3,KRAS,MAP3K7
Semaphorin Signaling in Neurons	1.87	0.25	RND3,RHOC,MAPK1,FNBP1,LIMK2,RHOQ,PTK2,RHOB,RHOT1,ITGB1,RHOF,PAK2,PLXNA1
Stearate Biosynthesis I (Animals)	1.86	0.2	SLC27A5,null,DHCR24,ELOVL2,BDH2,SLC27A3,ACSL1,ACSL3,ACOT7,FASN
4-1BB Signaling in T Lymphocytes	1.85	0.25	MAP2K4,NFKBIA,MAP3K5,JUN,MAPK1,IKBKB,TRAF1,MAP2K2,ATF2
Gluconeogenesis I	1.85	0.16	ME1,ME2,MDH1,ALDOC,PGK1,GAPDHS,ENO2,GPI
Acute Phase Response Signaling	1.84	0.18	GRB2,TNFRSF11B,AKT3,MAP2K2,NFKBIA,FOS,MAP2K3,NRAS,PIK3R3,SOCS2,NGFR,KRAS,MAP3K7,MAP2K4,A2M,MAP3K5,PTPN11,IKBKB,MAPK1,IL1RAP,TCF3,SOS2,SOCS1,TCF4,RRAS2,NR3C1,FN1,FTL,JUN,MBL2,C3,ECSIT
RANK Signaling in Osteoclasts	1.84	0.2	MAP2K4,BIRC2,MAP3K5,MAPK1,IKBKB,AKT3,MAP2K2,PPP3CA,CHP1,NFATC1,PIK3C3,CALM1 (includes others),NFKBIA,FOS,MAP3K12,JUN,PIK3R3,GSN,MAP3K7
TNFR1 Signaling	1.84	0.231	MAP2K4,NFKBIA,FOS,BIRC2,CDC42,JUN,IKBKB,TNFAIP3,CASP2,MADD,TANK,PAK2
Paxillin Signaling	1.79	0.189	MAP2K4,GRB2,ACTN1,CDC42,MAPK1,SOS2,PTK2,ITGAV,NCK2,ACTG2,PIK3C3,RRAS2,ITGA6,ACTN4,NRAS,ITGB1,PIK3R3,PAK2,KRAS,ITGA7,GIT2
Epoxysqualene Biosynthesis	1.78	0.222	FDFT1,SQLE
Flavin Biosynthesis IV (Mammalian)	1.78	0.25	FLAD1,RFK
Angiopoietin Signaling	1.76	0.203	GRB2,GRB14,IKBKB,PTPN11,AKT3,TNIP1,RASA1,PTK2,NFKBIA,PIK3C3,RRAS2,NRAS,PIK3R3,PAK2,KRAS
p70S6K Signaling	1.76	0.186	GRB2,PRKCH,PPP2R1B,MAPK1,AKT3,MAPT,PPP2R3B,MAP2K2,SOS2,EEF2,PIK3C3,RRAS2,PLD1,PPP2CA,YWHAZ,PPP2R5C,null,NRAS,YWHAB,PPP2R1A,PIK3R3,PPP2R5A,PRKD3,KRAS
Polyamine Regulation in Colon Cancer	1.75	0.241	TCF4,MYC,SAT1,AZIN1,KRAS,PPARG,ODC1
Pentose Phosphate Pathway (Oxidative Branch)	1.75	0.273	G6PD,PGLS,PGD
Mouse Embryonic Stem Cell Pluripotency	1.74	0.202	GRB2,PTPN11,MAPK1,TCF3,TYK2,AKT3,MAP2K2,SOS2,FZD6,TCF4,PIK3C3,MYC,RRAS2,LIF,NRAS,ID4,ID3,PIK3R3,KRAS,MAP3K7
Role of CHK Proteins in Cell Cycle Checkpoint Control	1.74	0.232	PPP2R1B,RFC3,PPP2R3B,CDKN1A,CDK1,CDK2,ATMIN,PPP2CA,PPP2R5C,E2F5,PPP2R1A,PPP2R5A,BRCA1
ErbB4 Signaling	1.72	0.209	GRB2,PRKCH,MAPK1,MAP2K2,SOS2,PSEN2,PIK3C3,RRAS2,APH1B,NRAS,PSENEN,PIK3R3,PRKD3,KRAS
IL-17 Signaling	1.7	0.216	MAP2K4,MAPK1,AKT3,MAP2K2,TIMP1,CXCL1,PIK3C3,RRAS2,MAPKAPK2,JUN,MAP2K3,NRAS,ATF2,PIK3R3,KRAS,MAP3K7
Salvage Pathways of Pyrimidine Ribonucleotides	1.69	0.176	MAP2K4,PRPF4B,EIF2AK2,PRKCH,MAPK1,LIMK2,MAP2K2,CDK1,CDK2,CSNK1A1,GRK5,MAP2K3,BRAF,PAK2,NME5,GRK6,UCK2,SGK1
Assembly of RNA Polymerase I Complex	1.69	0.308	TAF1B,TAF1A,POLR1C,TAF1C
Leucine Degradation I	1.69	0.154	MCCC2,HMGCL,AUH,MCCC1
Clathrin-mediated Endocytosis Signaling	1.67	0.173	DNM2,GRB2,ACTR2,WASL,ARPC4,AP1G2,CHP1,CLTB,ACTG2,PIK3C3,LDLRAP1,ARPC5L,IGF1,HIP1,PIK3R3,DAB2,NUMB,SH3GLB1,CDC42,CSNK2B,STAM,DNM1L,RAB4B,LDLR,AP2S1,PPP3CA,AMPH,APOC1,EPS15,APOE,TSG101,CTTN,ITGB1,UBB
γ-linolenate Biosynthesis II (Animals)	1.66	0.24	SLC27A5,FADS1,CYB5R3,SLC27A3,ACSL1,ACSL3
Cell Cycle: G1/S Checkpoint Regulation	1.66	0.212	CDKN2A,HDAC4,RBL2,SMAD3,CCNE2,CCND1,CDKN1A,CDK2,MYC,GNL3,HDAC9,E2F5,RPL11,CCND3
IL-1 Signaling	1.64	0.179	MAP2K4,GNG11,IL1RAP,GNG4,MAPK1,GNA11,IKBKB,PRKAR1A,ADCY1,ADCY2,PRKAG2,NFKBIA,FOS,JUN,MAP2K3,ECSIT,GNB1,GNG5,MAP3K7
Assembly of RNA Polymerase II Complex	1.63	0.214	POLR2B,GTF2H1,POLR2G,TAF12,POLR2I,GTF2F1,TAF2,TAF13,MNAT1,TAF7,TAF5,DR1
Actin Cytoskeleton Signaling	1.61	0.16	GRB2,SSH1,ACTN1,TMSB10/TMSB4X,ACTR2,LIMK2,ARHGEF4,MAP2K2,WASL,PIP4K2A,ARPC4,ACTG2,ARPC5L,PIK3C3,DIAPH2,BAIAP2,RDX,NRAS,PIK3R3,KRAS,EZR,CYFIP2,CDC42,MAPK1,SOS2,PTK2,MYL6B,RRAS2,MPRIP,FN1,ACTN4,PIP5K1A,ABI2,TIAM1,TRIO,ITGB1,PAK2,GSN
CTLA4 Signaling in Cytotoxic T Lymphocytes	1.6	0.194	GRB2,PPP2R1B,PTPN11,AKT3,PPP2R3B,AP2S1,HLA-DRA,AP1G2,FCER1G,CLTB,PIK3C3,PPP2CA,PPP2R5C,HLA-DRB1,HLA-DQB1,PPP2R1A,PPP2R5A,PIK3R3,AP1S1
Agrin Interactions at Neuromuscular Junction	1.59	0.217	MAP2K4,CDC42,MAPK1,GABPB1,DAG1,PTK2,ACTG2,RRAS2,ITGA6,JUN,CTTN,NRAS,ITGB1,PAK2,KRAS
Role of IL-17F in Allergic Inflammatory Airway Diseases	1.59	0.229	IL11,RPS6KA5,CXCL1,IGF1,ATF4,CREB1,MAPK1,RPS6KA2,MAP2K2,ATF2,CREB3
DNA Double-Strand Break Repair by Non-Homologous End Joining	1.58	0.263	XRCC4,PARP1,PRKDC,XRCC1,DCLRE1C
Chondroitin Sulfate Degradation (Metazoa)	1.58	0.217	HEXB,GM2A,GALNS,CD44,HEXA
3-phosphoinositide Biosynthesis	1.57	0.169	PTPRF,PIK3C3,PTPN1,PTPN11,PTPRO,PIP5K1A,ITPK1,PIP4K2A,PTPN13,PIK3R3,PPM1F,PPP3CA
Wnt/β-catenin Signaling	1.56	0.179	CDKN2A,PPP2R1B,WNT5A,PPP2R3B,AKT3,RUVBL2,DKK3,TLE1,CSNK1A1,FZD6,DKK1,ILK,TGFBR2,MYC,PPP2CA,PPP2R5C,CD44,MAP3K7,CSNK2B,TCF3,CCND1,SFRP1,CSNK1G2,CSNK1G3,TGFBR3,TCF4,JUN,PPP2R1A,PPP2R5A,RARA,UBB
ErbB2-ErbB3 Signaling	1.55	0.217	GRB2,MAPK1,TYK2,CCND1,MAP2K2,SOS2,PIK3C3,MYC,RRAS2,JUN,NRAS,PIK3R3,KRAS
Mechanisms of Viral Exit from Host Cells	1.55	0.222	ACTG2,SH3GLB1,PRKCH,CHMP2A,PDCD6IP,SNF8,TSG101,CHMP2B,PRKD3,LMNB2
Estrogen-mediated S-phase Entry	1.55	0.25	MYC,CCND1,E2F5,CCNE2,CDKN1A,CDK1,CDK2
VEGF Signaling	1.55	0.182	GRB2,ACTN1,EIF2B2,null,MAPK1,AKT3,MAP2K2,SOS2,PTK2,ACTG2,PIK3C3,RRAS2,ARNT,BCL2,ACTN4,NRAS,PIK3R3,KRAS
Antiproliferative Role of Somatostatin Receptor 2	1.54	0.197	GNG11,GNG4,MAPK1,PTPN11,MAP2K2,CDKN1A,PIK3C3,RRAS2,NRAS,BRAF,PIK3R3,GNB1,KRAS,GNG5
Cardiac β-adrenergic Signaling	1.54	0.163	PPP2R1B,ATP2A2,PRKAR1A,PPP2R3B,ADCY1,ADCY2,PRKAG2,AKAP8,PDE4D,PPP2CA,PPP2R5C,AKAP2/PALM2-AKAP2,CACNA1D,PDE9A,GNG5,GNG11,GNG4,PDE8A,PDE4B,PDE4A,ATP2A3,PPP2R1A,GNB1,PPP2R5A,AKAP10
CNTF Signaling	1.51	0.218	GRB2,RPS6KA5,PIK3C3,RRAS2,PTPN11,MAPK1,RPS6KA2,TYK2,NRAS,MAP2K2,PIK3R3,KRAS
PAK Signaling	1.5	0.17	MAP2K4,GRB2,CDC42,MAPK1,LIMK2,MAP2K2,WASL,SOS2,PTK2,MYL6B,NCK2,PIK3C3,RRAS2,NRAS,ITGB1,PIK3R3,PAK2,KRAS
Glycogen Biosynthesis II (from UDP-D-Glucose)	1.49	0.25	GYG1,GBE1,GYS1
Aldosterone Signaling in Epithelial Cells	1.48	0.167	PRKCH,MAP2K2,HSP90AB1,PIP4K2A,DNAJC3,DNAJC2,ITPR1,HSPA4,PIK3C3,HSPH1,DNAJB1,HSPE1,PIK3R3,KRAS,PRKD3,HSPA13,DNAJC4,HSPA6,HSPB8,MAPK1,HSPA14,DNAJC22,SOS2,ITPR3,DNAJC1,PIP5K1A,DNAJC6,SGK1
Colorectal Cancer Metastasis Signaling	1.47	0.16	GRB2,WNT5A,RHOC,PRKAR1A,TYK2,MMP2,AKT3,ADCY1,MAP2K2,FZD6,ADCY2,PRKAG2,PIK3C3,TGFBR2,MYC,FOS,RHOT1,NRAS,BRAF,PIK3R3,KRAS,GNG5,MAP2K4,RND3,GNG11,SMAD3,MAPK1,GNG4,TCF3,FNBP1,CCND1,RHOQ,SOS2,TCF4,RHOB,MMP8,RRAS2,JUN,IFNGR1,GNB1,RHOF
CREB Signaling in Neurons	1.46	0.153	GRB2,PRKCH,POLR2I,GNA11,PRKAR1A,AKT3,ADCY1,MAP2K2,ITPR1,ADCY2,PRKAG2,PIK3C3,CALM1 (includes others),NRAS,ATF2,PIK3R3,KRAS,PRKD3,CREB3,GNG5,GNG11,POLR2G,ATF4,GNG4,MAPK1,SOS2,ITPR3,POLR2B,RRAS2,CREB1,GNB1
Dermatan Sulfate Degradation (Metazoa)	1.45	0.217	HEXB,IDS,GM2A,CD44,HEXA
IL-3 Signaling	1.44	0.203	GRB2,PRKCH,MAPK1,AKT3,MAP2K2,PPP3CA,CHP1,PIK3C3,RRAS2,FOS,JUN,NRAS,PIK3R3,PRKD3,KRAS
Small Cell Lung Cancer Signaling	1.44	0.169	BIRC2,IKBKB,CCNE2,CCND1,AKT3,PTK2,CDK2,NFKBIA,PIK3C3,MYC,FHIT,BCL2,PIAS3,TRAF1,PIK3R3
RAR Activation	1.43	0.164	SMARCA4,PRKCH,PARP1,MED1,PRKAR1A,AKT3,ADCY1,GTF2H1,PRMT1,ADCY2,PRKAG2,FOS,NCOA1,RDH11,TRIM24,PIK3R3,PRKD3,NR2F2,PRMT2,MAP2K4,MAP3K5,SMAD3,MAPK1,CSNK2B,NR2F6,MNAT1,KAT2B,MAPKAPK2,JUN,RARA,IGFBP3
Systemic Lupus Erythematosus Signaling	1.42	0.154	HLA-G,HLA-F,GRB2,SNRPD2,AKT3,SNRPA1,NFATC1,HNRNPA2B1,SNRNP27,PIK3C3,FOS,TXNL4A,PRPF39,NRAS,PIK3R3,KRAS,PRPF4B,PRPF40A,HLA-E,HLA-A,MAPK1,SOS2,LSM7,PRPF19,NHP2L1,FCER1G,SNRNP40,CREM,RRAS2,PRPF18,PRPF38B,JUN,SNRPN,HLA-C,HLA-B,LSM3,NAA38,PRPF31
BMP signaling pathway	1.39	0.188	MAP2K4,GRB2,MAPK1,PRKAR1A,MAGED1,MAP2K2,PRKAG2,RRAS2,JUN,CREB1,NRAS,BMP7,ATF2,KRAS,MAP3K7
Role of MAPK Signaling in the Pathogenesis of Influenza	1.39	0.203	MAP2K4,MAP3K5,MAPK1,PRDX6,AKT3,PNPLA3,MAP2K2,PLA2G16,RRAS2,BCL2,MAP2K3,NRAS,ATF2,KRAS
T Cell Receptor Signaling	1.38	0.174	MAP2K4,GRB2,MAPK1,IKBKB,MAP2K2,SOS2,RASA1,PPP3CA,NFATC1,PIK3C3,CALM1 (includes others),NFKBIA,RRAS2,FOS,JUN,MALT1,NRAS,PIK3R3,KRAS
Antiproliferative Role of TOB in T Cell Signaling	1.37	0.269	TGFBR2,SMAD3,MAPK1,TOB1,PABPC4,CCNE2,CDK2
Thrombin Signaling	1.35	0.161	GRB2,PRKCH,RHOC,GNA11,AKT3,ARHGEF4,ADCY1,MAP2K2,ITPR1,ADCY2,PIK3C3,RHOT1,NRAS,PIK3R3,KRAS,PRKD3,GNG5,RND3,GNG11,IKBKB,MAPK1,GNG4,FNBP1,RHOQ,ITPR3,PTK2,MYL6B,RHOB,RRAS2,MPRIP,CREB1,GNB1,RHOF
Cyclins and Cell Cycle Regulation	1.35	0.18	CDKN2A,HDAC4,PPP2R1B,CCNE2,PPP2R3B,CCND1,CDKN1A,CDK1,CDK2,PPP2CA,PPP2R5C,HDAC9,E2F5,PPP2R1A,PPP2R5A,CCND3
Cell Cycle: G2/M DNA Damage Checkpoint Regulation	1.35	0.208	CDKN2A,CDC25B,YWHAZ,PRKDC,TOP2A,YWHAB,KAT2B,CDKN1A,CDK1,BRCA1
NF-κB Activation by Viruses	1.34	0.183	EIF2AK2,PRKCH,MAPK1,IKBKB,AKT3,ITGAV,NFKBIA,PIK3C3,RRAS2,ITGA6,NRAS,ITGB1,PIK3R3,PRKD3,KRAS
Toll-like Receptor Signaling	1.34	0.2	MAP2K4,NFKBIA,EIF2AK2,FOS,JUN,MAPK1,IKBKB,MAP2K3,ECSIT,null,MAP3K7
Ascorbate Recycling (Cytosolic)	1.34	0.154	GLRX,GSTO1
Glutathione Redox Reactions II	1.34	0.286	GLRX,GSR
D-glucuronate Degradation I	1.34	0.154	CRYL1,DCXR
Nur77 Signaling in T Lymphocytes	1.34	0.19	NFATC1,FCER1G,CHP1,CALM1 (includes others),HLA-DQB1,HLA-DRB1,BCL2,HDAC9,MAP2K5,HLA-DRA,PPP3CA,NR4A1
FGF Signaling	1.32	0.185	GRB2,RPS6KA5,ATF4,MAP3K5,MAPK1,PTPN11,AKT3,SOS2,ITPR1,PIK3C3,MAPKAPK2,CREB1,MAP2K3,ATF2,PIK3R3,CREB3,FGFR4
Caveolar-mediated Endocytosis Signaling	1.3	0.176	DNM2,CD55,HLA-A,COPA,ITGAV,ACTG2,FLOT1,PTPN1,ITGA6,HLA-C,ITGB1,HLA-B,CAV1,ITGA7,INSR
IL-4 Signaling	1.3	0.19	GRB2,TYK2,AKT3,SOS2,SOCS1,HLA-DRA,NFATC1,PIK3C3,RRAS2,NR3C1,HLA-DRB1,HLA-DQB1,NRAS,PIK3R3,KRAS
Acetyl-CoA Biosynthesis I (Pyruvate Dehydrogenase Complex)	1.29	0.25	DLAT,PDHB,PDHA1
IL-10 Signaling	1.29	0.179	MAP2K4,BLVRB,IL1RAP,MAPK1,IKBKB,IL10RB,TYK2,BLVRA,NFKBIA,FOS,JUN,MAP2K3,null,MAP3K7
Cell Cycle Control of Chromosomal Replication	1.29	0.226	MCM4,ORC6,DBF4,RPA3,CDC7,CDK2,MCM3
RhoGDI Signaling	1.27	0.152	GDI2,RHOC,GNA11,ACTR2,LIMK2,ARHGEF4,WASL,PIP4K2A,ARPC4,ACTG2,ARPC5L,RHOT1,ARHGEF18,RDX,CD44,EZR,GNG5,RND3,GNG11,CDC42,GNG4,FNBP1,RHOQ,MYL6B,RHOB,PIP5K1A,ITGB1,RHOF,GNB1,PAK2
Axonal Guidance Signaling	1.27	0.143	PRKCH,NRP2,TUBB3,WNT5A,GNA11,PRKAR1A,AKT3,TUBB2A,CHP1,ROBO1,PIK3C3,ARPC5L,SDCBP,PLXNB2,BAIAP2,NRAS,PIK3R3,NGFR,TUBB4B,GNG5,ADAM9,CDC42,MAPK1,NCK2,SHANK2,ITGB1,PAK2,GRB2,ACTR2,LIMK2,MAP2K2,WASL,ARPC4,KLC1,EIF4E,NFATC1,FZD6,TUBB,PRKAG2,SEMA4G,WIPF1,IGF1,MICAL1,SDC2,BMP7,TUBA4A,PRKD3,KRAS,GNG11,PTPN11,GNG4,SOS2,PLXND1,RASA1,PTK2,MYL6B,SEMA5A,PPP3CA,RRAS2,GNB1,PLXNA1,VASP,TUBB2B
Circadian Rhythm Signaling	1.26	0.216	BHLHE41,ATF4,CREB1,PER2,BHLHE40,ATF2,CREB3,AVP
Growth Hormone Signaling	1.25	0.184	RPS6KA5,PRKCH,A2M,MAPK1,IGF1R,SOCS1,PIK3C3,IGF1,FOS,RPS6KA2,SOCS2,PIK3R3,PRKD3,IGFBP3
Tight Junction Signaling	1.24	0.168	PPP2R1B,TNFRSF11B,PRKAR1A,CASK,AKT3,PPP2R3B,CSTF2,ACTG2,PRKAG2,CTNNA1,RAB13,TGFBR2,PPP2CA,FOS,PPP2R5C,NGFR,TJP1,CDC42,CSDA,MYL6B,TJP2,JUN,NUDT21,TIAM1,PPP2R1A,PPP2R5A,VASP
D-myo-inositol-5-phosphate Metabolism	1.24	0.173	PTPRF,PTPN1,PTPN11,PTPRO,ITPK1,PIP4K2A,PTPN13,PPM1F,PPP3CA
GM-CSF Signaling	1.24	0.191	GRB2,MAPK1,PTPN11,CCND1,AKT3,MAP2K2,SOS2,PPP3CA,PIK3C3,RRAS2,NRAS,PIK3R3,KRAS
Dopamine-DARPP32 Feedback in cAMP Signaling	1.23	0.153	PRKCH,PPP2R1B,ATP2A2,PRKAR1A,PPP2R3B,ADCY1,CSNK1A1,ITPR1,ADCY2,CHP1,PRKAG2,CALM1 (includes others),PPP2CA,PPP2R5C,CACNA1D,ATF2,PRKD3,CREB3,ATF4,CSNK1G3,CSNK1G2,ITPR3,PPP3CA,CREM,ATP2A3,CREB1,PPP2R1A,PPP2R5A
CD27 Signaling in Lymphocytes	1.23	0.193	MAP2K4,NFKBIA,MAP3K12,FOS,MAP3K5,JUN,IKBKB,MAP2K3,MAP2K2,MAP2K5,MAP3K7
Glycolysis I	1.21	0.156	TPI1,ALDOC,PGK1,GAPDHS,ENO2,PFKP,GPI
PI3K Signaling in B Lymphocytes	1.2	0.164	ATF4,MAPK1,IKBKB,AKT3,MAP2K2,PLEKHA4,ITPR3,ITPR1,PPP3CA,CHP1,NFATC1,NFKBIA,CALM1 (includes others),RRAS2,FOS,JUN,CREB1,MALT1,C3,NRAS,ATF2,KRAS,ATF3
Oncostatin M Signaling	1.19	0.229	MT2A,GRB2,RRAS2,MAPK1,TYK2,NRAS,MAP2K2,KRAS
Inhibition of Angiogenesis by TSP1	1.19	0.205	MAP2K4,TGFBR2,JUN,MAPK1,SDC2,AKT3,CD47,SDC1
Graft-versus-Host Disease Signaling	1.18	0.2	HLA-F,FCER1G,HLA-G,HLA-E,HLA-A,HLA-DQB1,HLA-DRB1,HLA-C,HLA-B,HLA-DRA
Role of Osteoblasts, Osteoclasts and Chondrocytes in Rheumatoid Arthritis	1.16	0.151	WNT5A,TNFRSF11B,AKT3,DKK3,CSNK1A1,FZD6,CHP1,NFATC1,DKK1,IL11,CALM1 (includes others),NFKBIA,PIK3C3,IGF1,FOS,MAP2K3,BMP7,ACP5,PIK3R3,NGFR,MAP3K7,MAP2K4,BIRC2,MAP3K5,IKBKB,MAPK1,IL1RAP,TCF3,SFRP1,PPP3CA,TCF4,MMP8,JUN,BCL2,ITGB1,GSN
Valine Degradation I	1.14	0.143	ALDH6A1,AUH,ECHS1,HADHA,HADHB
Nucleotide Excision Repair Pathway	1.13	0.229	POLR2B,GTF2H1,POLR2G,ERCC1,POLR2I,MNAT1,XPC,RPA3
Autoimmune Thyroid Disease Signaling	1.12	0.164	HLA-F,FCER1G,HLA-G,HLA-E,HLA-A,HLA-DQB1,HLA-DRB1,HLA-C,HLA-B,HLA-DRA
Fatty Acid Activation	1.11	0.211	SLC27A5,SLC27A3,ACSL1,ACSL3
Oleate Biosynthesis II (Animals)	1.11	0.211	FADS1,ALDH6A1,UFSP2,SCD
Corticotropin Releasing Hormone Signaling	1.11	0.147	JUND,PRKCH,ATF4,MAPK1,PRKAR1A,MAP2K2,ADCY1,ITPR3,ITPR1,ADCY2,PRKAG2,CALM1 (includes others),FOS,JUN,CREB1,BRAF,ATF2,PRKD3,CREB3,NR4A1
RhoA Signaling	1.11	0.175	IGF1R,ACTR2,LIMK2,PIP4K2A,ARPC4,SEPT7,PTK2,MYL6B,SEPT4,ACTG2,ARPC5L,MPRIP,PLD1,IGF1,BAIAP2,RDX,PIP5K1A,CDC42EP3,SEPT6,EZR
OX40 Signaling Pathway	1.11	0.17	HLA-F,MAP2K4,HLA-G,HLA-DRB4,HLA-A,HLA-E,HLA-DRA,FCER1G,NFKBIA,JUN,HLA-DRB1,HLA-DQB1,BCL2,HLA-C,HLA-B,HLA-DPA1
Role of JAK1, JAK2 and TYK2 in Interferon Signaling	1.09	0.222	PTPN2,TYK2,IFNGR1,IFNAR2,SOCS1,IFNGR2
TCA Cycle II (Eukaryotic)	1.09	0.143	MDH1,ACO1,IDH3A,SDHC,SDHB,OGDHL
Insulin Receptor Signaling	1.08	0.162	GRB2,EIF2B2,PTPN11,MAPK1,PRKAR1A,AKT3,GYS1,MAP2K2,SOS2,RHOQ,EIF4E,PRKAG2,PIK3C3,PTPRF,RRAS2,PTPN1,NRAS,GRB10,ACLY,PIK3R3,KRAS,INSR,SGK1
Arsenate Detoxification I (Glutaredoxin)	1.08	0.1	GLRX2,GSTO1
Heme Degradation	1.08	0.182	BLVRB,BLVRA
Myo-inositol Biosynthesis	1.08	0.25	IMPA2,IMPA1
Biotin-carboxyl Carrier Protein Assembly	1.08	0.133	ACACB,BTD
Hepatic Fibrosis / Hepatic Stellate Cell Activation	1.07	0.164	LAMA1,TNFRSF11B,A2M,ICAM1,IL1RAP,SMAD3,IGF1R,CTGF,MMP2,IFNAR2,IFNGR2,MYL6B,TIMP1,IGF1,EDNRB,TGFBR2,FN1,BAMBI,BCL2,TGFA,IFNGR1,TIMP2,NGFR,IGFBP3
IL-15 Signaling	1.05	0.179	PIK3C3,IL15,RRAS2,MAPK1,BCL2,TYK2,NRAS,AKT3,MAP2K2,PIK3R3,KRAS,PTK2
NF-κB Signaling	1.04	0.16	EIF2AK2,TNFRSF11B,UBE2V1,AKT3,DDR1,TNIP1,PIK3C3,NFKBIA,TGFBR2,MALT1,NRAS,TGFA,NGFR,PIK3R3,KRAS,INSR,MAP3K7,IKBKB,TNFAIP3,IGF1R,CSNK2B,FCER1G,TGFBR3,RRAS2,TANK,IGF2R,null,FGFR4
Relaxin Signaling	1.02	0.146	GNG11,GNG4,MAPK1,GNA11,PDE8A,PRKAR1A,AKT3,PDE4B,ADCY1,ADCY2,PRKAG2,PDE4A,PIK3C3,NFKBIA,PDE4D,FOS,JUN,CREB1,BRAF,GNB1,PIK3R3,PDE9A,GNG5
Sphingosine-1-phosphate Signaling	0.967	0.158	RND3,RHOC,MAPK1,FNBP1,CASP2,AKT3,ASAH1,SPHK1,ADCY1,RHOQ,PTK2,ADCY2,RHOB,PIK3C3,NAAA,RHOT1,RHOF,PIK3R3,SMPD1
iNOS Signaling	0.967	0.17	NFKBIA,CALM1 (includes others),FOS,JUN,MAPK1,IKBKB,TYK2,IFNGR1,IFNGR2
VEGF Family Ligand-Receptor Interactions	0.964	0.167	GRB2,NRP2,PRKCH,MAPK1,AKT3,MAP2K2,SOS2,PIK3C3,RRAS2,FOS,NRAS,PIK3R3,PRKD3,KRAS
April Mediated Signaling	0.958	0.186	NFATC1,MAP2K4,NFKBIA,FOS,JUN,MAPK1,IKBKB,TRAF1
Synaptic Long Term Potentiation	0.931	0.157	PRKCH,ATF4,MAPK1,GNA11,PRKAR1A,ADCY1,MAP2K2,ITPR3,ITPR1,PPP3CA,CHP1,PRKAG2,CALM1 (includes others),RRAS2,CREB1,NRAS,ATF2,PRKD3,CREB3,KRAS
Methionine Degradation I (to Homocysteine)	0.924	0.174	PRMT1,MAT2A,AHCYL1,AHCYL2
Death Receptor Signaling	0.909	0.172	TNFRSF10B,MAP2K4,NFKBIA,BIRC2,MAP3K5,IKBKB,BCL2,CASP2,TANK,null,CFLAR
Nitric Oxide Signaling in the Cardiovascular System	0.895	0.141	ATP2A2,PRKAR1A,AKT3,HSP90AB1,ITPR3,ITPR1,PRKAG2,CALM1 (includes others),PIK3C3,ATP2A3,CACNA1D,SLC7A1,PIK3R3,CAV1
Ovarian Cancer Signaling	0.894	0.155	CDKN2A,WNT5A,MAPK1,TCF3,PRKAR1A,AKT3,MMP2,CCND1,MAP2K2,FZD6,PRKAG2,TCF4,RAD51,PIK3C3,RRAS2,BCL2,NRAS,BRAF,PIK3R3,CD44,KRAS,BRCA1
Tetrapyrrole Biosynthesis II	0.891	0.154	HMBS,ALAS1
Trans, trans-farnesyl Diphosphate Biosynthesis	0.891	0.2	FDPS,IDI1
Thio-molybdenum Cofactor Biosynthesis	0.888	0.2	MOCOS
Acetyl-CoA Biosynthesis III (from Citrate)	0.888	0.125	ACLY
Lanosterol Biosynthesis	0.888	0.333	LSS
Calcium Transport I	0.887	0.214	ATP2A3,ATP2A2,ATP2B4
NAD Phosphorylation and Dephosphorylation	0.887	0.176	NNT,ACP5,ACP2
Folate Transformations I	0.887	0.0909	MTR,SHMT2,MTHFR
Induction of Apoptosis by HIV1	0.87	0.169	SLC25A10,MAP2K4,NFKBIA,TNFRSF11B,BIRC2,MAP3K5,IKBKB,BCL2,TRAF1,NGFR,SLC25A4
B Cell Activating Factor Signaling	0.86	0.178	NFATC1,MAP2K4,NFKBIA,FOS,JUN,MAPK1,IKBKB,TRAF1
tRNA Splicing	0.846	0.156	TSEN2,PDE4A,PDE4D,PDE8A,PDE4B,PDE9A,TSEN34
Glutathione Redox Reactions I	0.844	0.174	GPX4,MGST2,GSR,PRDX6
nNOS Signaling in Neurons	0.832	0.173	CAPN7,CHP1,CAPN3,CALM1 (includes others),PRKCH,CAPN2,PRKD3,CAPNS1,PPP3CA
CCR3 Signaling in Eosinophils	0.829	0.151	PRKCH,GNG11,GNG4,MAPK1,LIMK2,MAP2K2,ITPR3,ITPR1,PIK3C3,CALM1 (includes others),MPRIP,RRAS2,NRAS,GNB1,PIK3R3,PRKD3,PAK2,KRAS,GNG5
Role of IL-17A in Arthritis	0.812	0.159	MAP2K4,CXCL1,PIK3C3,NFKBIA,MAPKAPK2,MAPK1,MAP2K3,MAP2K2,ATF2,PIK3R3
IL-17A Signaling in Fibroblasts	0.798	0.175	NFKBIA,FOS,JUN,MAPK1,IKBKB,CEBPD,MAP3K7
Dolichyl-diphosphooligosaccharide Biosynthesis	0.791	0.0769	DPM3,ALG6,ALG13
Dopamine Receptor Signaling	0.777	0.138	PPP2R1B,PRKAR1A,PPP2R3B,ADCY1,QDPR,ADCY2,PRKAG2,PPP2CA,PPP2R5C,PPP2R1A,PPP2R5A,PTS,NCS1
Mitochondrial L-carnitine Shuttle Pathway	0.771	0.182	SLC27A5,SLC27A3,ACSL1,ACSL3
HIF1α Signaling	0.758	0.157	SLC2A1,MAPK1,AKT3,MMP2,SLC2A3,EGLN2,CUL2,LDHA,PIK3C3,MMP8,RRAS2,ARNT,JUN,NCOA1,NRAS,PIK3R3,KRAS
Role of Macrophages, Fibroblasts and Endothelial Cells in Rheumatoid Arthritis	0.757	0.135	PRKCH,WNT5A,TNFRSF11B,AKT3,MAP2K2,DKK3,CSNK1A1,FZD6,NFATC1,CHP1,DKK1,CALM1 (includes others),NFKBIA,PIK3C3,MYC,FOS,MAP2K3,NRAS,TRAF1,PIK3R3,ATF2,NGFR,CEBPD,CREB3,KRAS,PRKD3,MAP3K7,MAP2K4,ICAM1,ATF4,IKBKB,MAPK1,IL1RAP,TCF3,CCND1,SFRP1,SOCS1,PPP3CA,TCF4,RRAS2,IL15,FN1,MAPKAPK2,JUN,CREB1
p38 MAPK Signaling	0.754	0.162	MAP2K4,RPS6KA5,ATF4,MAP3K5,IL1RAP,DUSP10,MAPT,CDC25B,MYC,TGFBR2,MAPKAPK2,CREB1,RPS6KA2,MAP2K3,ATF2,CREB3,MKNK2,DDIT3,MAP3K7
CCR5 Signaling in Macrophages	0.753	0.128	FCER1G,MAP2K4,CALM1 (includes others),PRKCH,GNG11,FOS,JUN,GNG4,MAPK1,GNB1,PRKD3,GNG5
T Helper Cell Differentiation	0.753	0.167	FCER1G,TGFBR2,TNFRSF11B,HLA-DQB1,HLA-DRB1,IL10RB,IFNGR1,NGFR,BCL6,HLA-DRA,IL12A,IFNGR2
Arginine Biosynthesis IV	0.753	0.0833	GLUD1,GLUD2
Selenocysteine Biosynthesis II (Archaea and Eukaryotes)	0.753	0.118	SEPHS1,SEPHS2
Superoxide Radicals Degradation	0.753	0.25	CAT,NQO1
UDP-N-acetyl-D-glucosamine Biosynthesis II	0.753	0.118	GFPT2,GFPT1
Ceramide Degradation	0.753	0.143	NAAA,ASAH1
Leukocyte Extravasation Signaling	0.742	0.147	ACTN1,PRKCH,MMP2,MAP2K2,WASL,TIMP1,ACTG2,PIK3C3,CTNNA1,CTNND1,WIPF1,CYBA,RDX,PIK3R3,PRKD3,CD44,EZR,MAP2K4,CDC42,ICAM1,MAPK1,PTPN11,PTK2,MMP8,CTTN,ACTN4,TIMP2,ITGB1,VASP
IL-17A Signaling in Airway Cells	0.73	0.153	MAP2K4,CXCL1,PIK3C3,NFKBIA,MAPK1,IKBKB,TYK2,AKT3,MAP2K2,PIK3R3,MAP3K7
IL-22 Signaling	0.717	0.2	MAP2K4,MAPK1,IL10RB,TYK2,AKT3
Cleavage and Polyadenylation of Pre-mRNA	0.707	0.25	NUDT21,PAPOLA,CSTF2
D-myo-inositol (1,4,5)-trisphosphate Degradation	0.706	0.174	INPP1,IMPA2,IMPA1,INPP5A
Ethanol Degradation IV	0.706	0.138	ALDH3A2,CAT,ACSL1,ACSL3
Dendritic Cell Maturation	0.7	0.13	HLA-DRB4,TNFRSF11B,AKT3,DDR1,IL12A,CD58,PIK3C3,NFKBIA,HLA-DQB1,NGFR,ATF2,PIK3R3,CREB3,MAP2K4,HLA-A,ICAM1,ATF4,IKBKB,MAPK1,CD83,HLA-DRA,FCER1G,IL15,CREB1,HLA-DRB1,HLA-C,HLA-B
TR/RXR Activation	0.686	0.146	ME1,SLC2A1,MED1,AKT3,PFKP,LDLR,SREBF2,FASN,PIK3C3,NCOA1,SCARB1,UCP2,PIK3R3,TBL1XR1
Notch Signaling	0.668	0.163	APH1B,JAG1,PSENEN,RBPJ,NUMB,DTX4,PSEN2
IL-17A Signaling in Gastric Cells	0.666	0.2	MAP2K4,CXCL1,FOS,JUN,MAPK1
Role of JAK family kinases in IL-6-type Cytokine Signaling	0.666	0.185	MAP2K4,PTPN11,MAPK1,TYK2,SOCS1
Calcium Signaling	0.664	0.128	TPM4,RCAN1,ATP2A2,PRKAR1A,TNNI3,ATP2B4,TNNT1,ITPR1,CHP1,NFATC1,PRKAG2,CALM1 (includes others),RAP2B,TRPV6,ATF2,CREB3,TPM1,HDAC4,ATF4,MAPK1,ASPH,ITPR3,PPP3CA,MYL6B,ATP2A3,CREB1,HDAC9
iCOS-iCOSL Signaling in T Helper Cells	0.661	0.138	GRB2,IKBKB,AKT3,PLEKHA4,ITPR3,HLA-DRA,ITPR1,PPP3CA,FCER1G,CHP1,NFATC1,CALM1 (includes others),NFKBIA,PIK3C3,HLA-DRB1,HLA-DQB1,PIK3R3
Fcγ Receptor-mediated Phagocytosis in Macrophages and Monocytes	0.66	0.147	PRKCH,CDC42,MAPK1,ACTR2,AKT3,ARPC4,NCK2,ACTG2,ARPC5L,PLD1,PIP5K1A,PIK3R3,PRKD3,EZR,VASP
1D-myo-inositol Hexakisphosphate Biosynthesis II (Mammalian)	0.647	0.143	ITPKC,ITPK1,ITPKB,INPP5A
Aspartate Degradation II	0.644	0.143	MDH1,GOT1
GDP-mannose Biosynthesis	0.644	0.143	GPI,GMPPB
Ephrin B Signaling	0.636	0.15	NCK2,CAP1,ABI1,GNG11,CDC42,ITSN2,GNG4,GNA11,MAPK1,GNB1,GNG5,PTK2
Cytotoxic T Lymphocyte-mediated Apoptosis of Target Cells	0.635	0.153	HLA-G,HLA-F,HLA-DRB4,HLA-A,HLA-E,HLA-DRA,FCER1G,HLA-DRB1,HLA-DQB1,BCL2,HLA-C,HLA-DPA1,HLA-B
Phosphatidylglycerol Biosynthesis II (Non-plastidic)	0.634	0.0968	AGPAT5,CDS2,ABHD5
Purine Nucleotides De Novo Biosynthesis II	0.634	0.0698	ADSL,null,GMPS
UDP-D-xylose and UDP-D-glucuronate Biosynthesis	0.616	0.143	UXS1
Diphthamide Biosynthesis	0.616	0.0769	EEF2
β-alanine Degradation I	0.616	0.1	ALDH6A1
Spermine Biosynthesis	0.616	0.143	AMD1
All-trans-decaprenyl Diphosphate Biosynthesis	0.616	0.167	PDSS1
Taurine Biosynthesis	0.616	0.111	CSAD
Uridine-5'-phosphate Biosynthesis	0.616	0.05	CAD
Fatty Acid Biosynthesis Initiation II	0.616	0.143	FASN
Adenine and Adenosine Salvage I	0.616	0.111	APRT
Putrescine Biosynthesis III	0.616	0.25	ODC1
Role of BRCA1 in DNA Damage Response	0.612	0.154	RAD51,SMARCA4,RFC3,RBL2,FANCG,E2F5,RBBP8,CDKN1A,BRIP1,BRCA1
DNA Methylation and Transcriptional Repression Signaling	0.593	0.174	MBD3,SAP30,SAP130,DNMT1
Synaptic Long Term Depression	0.589	0.132	PRKCH,PPP2R1B,MAPK1,GNA11,IGF1R,PRDX6,PPP2R3B,MAP2K2,PNPLA3,PLA2G16,ITPR3,ITPR1,IGF1,RRAS2,PPP2CA,PPP2R5C,NRAS,PPP2R1A,PPP2R5A,PRKD3,KRAS
Crosstalk between Dendritic Cells and Natural Killer Cells	0.587	0.147	HLA-F,HLA-G,HLA-DRB4,HLA-A,HLA-E,CD83,IL12A,HLA-DRA,MICB,ACTG2,IL15,HLA-DRB1,HLA-C,HLA-B
Lymphotoxin β Receptor Signaling	0.584	0.148	CXCL1,PIK3C3,NFKBIA,BIRC2,MAPK1,IKBKB,AKT3,TRAF1,PIK3R3
Macropinocytosis Signaling	0.583	0.145	PIK3C3,ABI1,PRKCH,RRAS2,CDC42,ACTN4,NRAS,ITGB1,PIK3R3,PRKD3,KRAS
Endothelin-1 Signaling	0.572	0.134	GRB2,PRKCH,GNA11,CASP2,ADCY1,PLA2G16,ITPR1,ADCY2,PIK3C3,MYC,EDNRB,FOS,NRAS,BRAF,PIK3R3,PRKD3,KRAS,MAPK1,PRDX6,PNPLA3,ITPR3,PLD1,RRAS2,JUN,SHC3
DNA Double-Strand Break Repair by Homologous Recombination	0.57	0.176	RAD51,LIG1,BRCA1
Phenylalanine Degradation IV (Mammalian, via Side Chain)	0.57	0.0769	GOT1,ALDH3A2,SLC27A3
Role of JAK2 in Hormone-like Cytokine Signaling	0.564	0.167	PTPN1,SH2B3,PTPN11,TYK2,SOCS2,SOCS1
FcγRIIB Signaling in B Lymphocytes	0.558	0.119	MAP2K4,GRB2,PIK3C3,RRAS2,NRAS,PIK3R3,KRAS
Chemokine Signaling	0.557	0.151	CALM1 (includes others),MPRIP,RRAS2,FOS,JUN,MAPK1,NRAS,LIMK2,MAP2K2,KRAS,PTK2
Airway Pathology in Chronic Obstructive Pulmonary Disease	0.556	0.222	MMP8,MMP2
Sphingosine and Sphingosine-1-phosphate Metabolism	0.556	0.0952	NAAA,ASAH1
Phosphatidylethanolamine Biosynthesis II	0.556	0.111	ETNK1,PIGF
Role of JAK1 and JAK3 in γc Cytokine Signaling	0.556	0.149	GRB2,PIK3C3,IL15,RRAS2,PTPN11,MAPK1,NRAS,PIK3R3,KRAS,SOCS1
Melatonin Signaling	0.532	0.141	MAP2K4,PRKAG2,CALM1 (includes others),PRKCH,MAPK1,PRKAR1A,MAP2K3,BRAF,MAP2K2,PRKD3,MAP2K5
nNOS Signaling in Skeletal Muscle Cells	0.514	0.0968	CAPN3,CALM1 (includes others),DAG1
CDP-diacylglycerol Biosynthesis I	0.514	0.111	AGPAT5,CDS2,ABHD5
Colanic Acid Building Blocks Biosynthesis	0.514	0.0811	GPI,GMPPB,GALE
VDR/RXR Activation	0.513	0.148	PRKCH,MED1,NCOA1,SERPINB1,VDR,TRPV6,CDKN1A,PRKD3,IGFBP6,IL12A,WT1,IGFBP3
Xenobiotic Metabolism Signaling	0.499	0.134	CYP1A1,PRKCH,PPP2R1B,MED1,PNPLA6,PPP2R3B,MAP2K2,HSP90AB1,CHST3,MAP2K5,PIK3C3,ALDH3A2,MAP3K12,PPP2CA,ALDH6A1,ARNT,PPP2R5C,NCOA1,MAP2K3,CAT,NRAS,PIK3R3,GSTO1,KRAS,PRKD3,NQO1,MAP3K7,MAP2K4,MAP3K5,MAPK1,KEAP1,GSTM3,MGST2,NQO2,RRAS2,FTL,PPP2R1A,PPP2R5A,CHST11,CHST12
Sucrose Degradation V (Mammalian)	0.483	0.1	TPI1,ALDOC
UDP-N-acetyl-D-galactosamine Biosynthesis II	0.483	0.0833	GPI,GALE
Hepatic Cholestasis	0.481	0.115	MAP2K4,PRKCH,TNFRSF11B,IL1RAP,IKBKB,PRKAR1A,ADCY1,ADCY2,PRKAG2,NFKBIA,TJP2,SLC4A2,JUN,NGFR,PRKD3,RARA,FGFR4,INSR,NR1H3,MAP3K7
Factors Promoting Cardiogenesis in Vertebrates	0.475	0.138	PRKCH,TCF3,CCNE2,CDK2,TGFBR3,FZD6,TCF4,DKK1,TGFBR2,BMP7,ATF2,PRKD3,MAP3K7
Fc Epsilon RI Signaling	0.474	0.137	MAP2K4,GRB2,PRKCH,MAPK1,PTPN11,AKT3,MAP2K2,SOS2,FCER1G,PIK3C3,RRAS2,MAP2K3,NRAS,PIK3R3,PRKD3,KRAS
Methylglyoxal Degradation I	0.468	0.0909	GLO1
Coenzyme A Biosynthesis	0.468	0.0714	PPCDC
1,25-dihydroxyvitamin D3 Biosynthesis	0.468	0.1	POR
Palmitate Biosynthesis I (Animals)	0.468	0.027	FASN
Tetrahydrobiopterin Biosynthesis I	0.468	0.0909	PTS
Methionine Salvage II (Mammalian)	0.468	0.111	MTR
Inosine-5'-phosphate Biosynthesis II	0.468	0.0625	ADSL
Hypusine Biosynthesis	0.468	0.2	DHPS
Spermidine Biosynthesis I	0.468	0.125	AMD1
Thyroid Hormone Biosynthesis	0.468	0.143	CTSD
1D-myo-inositol Hexakisphosphate Biosynthesis V (from Ins(1,3,4)P3)	0.468	0.1	ITPK1
Oxidized GTP and dGTP Detoxification	0.468	0.0909	RUVBL2
Tetrahydrobiopterin Biosynthesis II	0.468	0.0769	PTS
Glutamate Degradation II	0.468	0.1	GOT1
Granzyme B Signaling	0.463	0.188	PARP1,PRKDC,LMNB2
Oxidative Ethanol Degradation III	0.463	0.075	ALDH3A2,ACSL1,ACSL3
Gα12/13 Signaling	0.463	0.135	MAP2K4,MAP3K5,CDC42,MAPK1,IKBKB,AKT3,MAP2K2,RASA1,PTK2,MYL6B,PIK3C3,NFKBIA,RRAS2,JUN,NRAS,PIK3R3,KRAS
Leptin Signaling in Obesity	0.442	0.133	ADCY2,PRKAG2,GRB2,PIK3C3,PTPN11,MAPK1,PRKAR1A,AKT3,ADCY1,MAP2K2,PIK3R3
Role of Oct4 in Mammalian Embryonic Stem Cell Pluripotency	0.439	0.156	SH3GLB1,PARP1,FAM208A,NR2F6,RARA,BRCA1,NR2F2
Allograft Rejection Signaling	0.429	0.126	HLA-F,FCER1G,HLA-G,HLA-DRB4,HLA-E,HLA-A,HLA-DQB1,HLA-DRB1,HLA-C,HLA-DPA1,HLA-B,HLA-DRA
Glycogen Degradation II	0.422	0.125	PGM1,PYGB
Netrin Signaling	0.405	0.105	NFATC1,CHP1,NCK2,PRKAG2,PRKAR1A,PPP3CA
Communication between Innate and Adaptive Immune Cells	0.4	0.119	HLA-G,HLA-F,HLA-DRB4,HLA-A,HLA-E,CD83,IL12A,HLA-DRA,FCER1G,IL15,HLA-DRB1,HLA-C,HLA-B
LPS/IL-1 Mediated Inhibition of RXR Function	0.397	0.126	TNFRSF11B,CHST3,ALDH3A2,ALDH6A1,NCOA1,ALAS1,CAT,SLC27A3,NGFR,GSTO1,MAP3K7,ACOX1,MAP2K4,IL1RAP,SLC35A2,GSTM3,SLC27A5,MGST2,JUN,APOC1,APOE,SCARB1,ECSIT,ACSL1,ACSL3,CHST11,RARA,CHST12,HMGCS1,NR1H3
Role of PKR in Interferon Induction and Antiviral Response	0.379	0.13	NFKBIA,EIF2AK2,IKBKB,MAP2K3,ATF2,MAP3K7
Cardiomyocyte Differentiation via BMP Receptors	0.379	0.15	BMP7,ATF2,MAP3K7
Endoplasmic Reticulum Stress Pathway	0.379	0.167	MAP3K5,ATF4,DNAJC3
Serine Biosynthesis	0.371	0.0769	PSAT1
Heme Biosynthesis from Uroporphyrinogen-III I	0.371	0.0909	UROD
Spermine and Spermidine Degradation I	0.371	0.0714	SAT1
Phenylethylamine Degradation I	0.371	0.0909	ALDH3A2
Eumelanin Biosynthesis	0.371	0.0909	DCT
Methylmalonyl Pathway	0.371	0.0833	PCCB
Geranylgeranyldiphosphate Biosynthesis	0.371	0.125	FDPS
NAD Biosynthesis III	0.371	0.1	NAMPT
L-cysteine Degradation I	0.371	0.0909	GOT1
Lactose Degradation III	0.371	0.143	GLB1
N-acetylglucosamine Degradation II	0.371	0.0833	NAGK
G Protein Signaling Mediated by Tubby	0.368	0.122	GNG11,GNG4,GNB1,GNG5,INSR
Triacylglycerol Biosynthesis	0.368	0.109	AGPAT5,PPAP2C,ELOVL2,ABHD5,PPAP2B
eNOS Signaling	0.364	0.118	DNM2,NOSIP,PRKAR1A,AKT3,HSPA14,HSP90AB1,ADCY1,ITPR3,ITPR1,ADCY2,PRKAG2,CALM1 (includes others),HSPA4,PIK3C3,SLC7A1,PIK3R3,CAV1,HSPA6
FXR/RXR Activation	0.358	0.119	SLC27A5,MAP2K4,SLC4A2,APOE,AKT3,SCARB1,RARA,SDC1,PPARG,FGFR4,NR1H3,FASN
Triacylglycerol Degradation	0.356	0.121	ABHD5,MGLL,PRDX6,PNPLA3
MIF Regulation of Innate Immunity	0.354	0.12	MAP2K4,NFKBIA,FOS,JUN,MAPK1,CD74
Natural Killer Cell Signaling	0.354	0.129	GRB2,PRKCH,MAPK1,PTPN11,AKT3,MAP2K2,SOS2,FCER1G,PIK3C3,RRAS2,NRAS,PIK3R3,PRKD3,PAK2,KRAS
Role of NANOG in Mammalian Embryonic Stem Cell Pluripotency	0.354	0.132	GRB2,WNT5A,MAPK1,TYK2,AKT3,MAP2K2,SOS2,FZD6,PIK3C3,RRAS2,NRAS,LIF,BMP7,PIK3R3,KRAS
D-myo-inositol (1,3,4)-trisphosphate Biosynthesis	0.343	0.12	ITPKC,ITPKB,INPP5A
Bladder Cancer Signaling	0.326	0.132	CDKN2A,RPS6KA5,MMP8,RRAS2,MYC,MAPK1,NRAS,CCND1,MMP2,MAP2K2,CDKN1A,KRAS
IL-12 Signaling and Production in Macrophages	0.325	0.115	MAP2K4,PRKCH,MAPK1,IKBKB,AKT3,MAP2K2,IL12A,JMJD6,PIK3C3,FOS,APOC1,JUN,APOE,NCOA1,IFNGR1,PIK3R3,PRKD3,PPARG
Glycogen Degradation III	0.325	0.111	PGM1,PYGB
Lipid Antigen Presentation by CD1	0.31	0.13	CANX,FCER1G,PSAP
2-ketoglutarate Dehydrogenase Complex	0.301	0.1	OGDHL
CMP-N-acetylneuraminate Biosynthesis I (Eukaryotes)	0.301	0.0556	NAGK
Glycerol Degradation I	0.301	0.0833	GK
2-oxobutanoate Degradation I	0.301	0.0588	PCCB
Galactose Degradation I (Leloir Pathway)	0.301	0.0625	GALE
Phenylalanine Degradation I (Aerobic)	0.301	0.0833	QDPR
Folate Polyglutamylation	0.301	0.0588	SHMT2
PXR/RXR Activation	0.294	0.103	PRKAG2,ALDH3A2,NR3C1,ALAS1,NCOA1,PRKAR1A,AKT3,SCD,INSR
Assembly of RNA Polymerase III Complex	0.287	0.125	BRF2,SF3A2
Acyl-CoA Hydrolysis	0.287	0.125	null,ACOT7
Amyotrophic Lateral Sclerosis Signaling	0.281	0.11	BIRC2,AKT3,PPP3CA,CAPN7,CAPN3,PIK3C3,IGF1,CAPN2,BCL2,CAT,CACNA1D,PIK3R3,CAPNS1
tRNA Charging	0.254	0.0617	EPRS,QARS,YARS2,CARS,FARSA
Androgen Biosynthesis	0.253	0.0769	EBP,SRD5A1
NAD Biosynthesis from 2-amino-3-carboxymuconate Semialdehyde	0.248	0.0588	QPRT
Pyruvate Fermentation to Lactate	0.248	0.1	LDHA
Chondroitin and Dermatan Biosynthesis	0.248	0.0769	CSGALNACT1
Ceramide Biosynthesis	0.248	0.0625	SPTLC2
Thioredoxin Pathway	0.248	0.125	TXNRD1
Pentose Phosphate Pathway (Non-oxidative Branch)	0.248	0.0769	RPE
Glycine Cleavage Complex	0.248	0.0667	GLDC
Pregnenolone Biosynthesis	0.248	0.0769	MICAL1
GDP-glucose Biosynthesis	0.248	0.0588	PGM1
dTMP De Novo Biosynthesis	0.248	0.0667	SHMT2
Tyrosine Degradation I	0.248	0.0667	FAH
Telomere Extension by Telomerase	0.224	0.118	HNRNPA2B1,HNRNPA1
The Visual Cycle	0.224	0.0714	RLBP1,RDH11
Glucose and Glucose-1-phosphate Degradation	0.207	0.0455	PGM1
Glycoaminoglycan-protein Linkage Region Biosynthesis	0.207	0.0667	XYLT1
Sphingomyelin Metabolism	0.207	0.0667	SMPD1

## Sheet: S1d
Table S1d. List of top networks associated with hPNPaseold-35 knockdown identified by IPA
Top Functions	Score	Focus Molecules	Molecules in Network
Cell Morphology, Skeletal and Muscular Disorders, Skeletal and Muscular System Development and Function	41	35	BLVRA,C19orf60,CEP135,CIAPIN1,CROCC,CRYL1,ERP29,GNPTAB,GRAMD3,GRAMD1B,H2AFV,KIAA0240,LAP3,MAPK1,NVL,OSBPL3,OSGEP,PARP12,PDLIM3,PHF11,PKP4,POP1 (includes EG:10940),POP4 (includes EG:10775),PRPSAP1,PRSS12,RPP14,RPP38,RPP40,SP110,SPOCK1,TMEM158,TMEM87A,UTP18,WIZ,ZNF318
Developmental Disorder, Hereditary Disorder, Connective Tissue Disorders	41	35	ADNP,AGPS,ANP32E,C21orf91,CCDC85B,CD164,CELF2,CTSH,ESF1,FAM214B,FOS,IDS,KXD1 (includes EG:39425),MOB1A,NSDHL,PLEKHF2,RTN3,SEC23B,SETD5,SLC38A2,SNN,STK38L,STX11,TFIP11,TPP1 (includes EG:1200),TRAPPC3,TRAPPC4,TRAPPC8,TRAPPC6A,TSPYL4,UTP6 (includes EG:216987),WBSCR22,ZC2HC1C,ZMYM4,ZMYM6
Hereditary Disorder, Metabolic Disease, Cellular Assembly and Organization	40	35	C6orf108,C9orf3,DDX18,DDX52,DLEU1,EMP3,FAM129A,FANCG,FANCI,GLUD2,GRPEL1,HEATR1,ICA1,ILVBL,IMPA2,IPO9,MINA,MRPS22,MUM1,MYC,NUP133 (includes EG:234865),PELO,PGAP1,PMP22,PMS1,RFC3,RTN2 (includes EG:20167),SCAMP1,SCAMP2,SEPHS2,SFXN1,TMEM97,TRMT1L,UBB,YME1L1
Cellular Assembly and Organization, RNA Post-Transcriptional Modification, Amino Acid Metabolism	37	34	AK4,ANK3,BPTF,C20orf3,CNOT2,EFR3A,EGLN2,ERBB2IP,GBE1,GTF2I,ISOC2,KEAP1,KIAA0564,LSM7,LSM3 (includes EG:100535720),MTR,NAA38,PGD,PRPF18,PRPF19,PRPF39,PRPF38B,RBBP6,SMAD3,SNRNP27,SNRNP40,snRNP,SNRPA1,SNRPD2,SNRPN,TOB1,TSC22D1,TXNL4A,YBX1,ZBTB38
Post-Translational Modification, Protein Degradation, Protein Synthesis	36	33	ATP6AP2,BIRC7,CACTIN,DCUN1D4,DZIP3,ERAP2,FUCA1,GFPT2,IBTK,KDM2A,LUC7L3,MKRN2,NAE1,NFkB (complex),NKIRAS2,PPP4R4,RBCK1,RIOK3,RNF5,RNF114,RNF115,RNF144A,SCLY,ST3GAL1,UBA3 (includes EG:117553),UBE2,UBE2A,UBE2D3,UBE2H,UBE2I,UBE2K,UBE2L6,UBE2M,UBE2V1,ZFAND6
Developmental Disorder, Hereditary Disorder, Metabolic Disease	36	33	ATXN7,beta-L-N-acetylhexosaminidase,BLOC1S1,BZW1,BZW2,COPS7A,CRIM1,CTNNA1,CTSZ,CUEDC2,CUL4B,DENND5A,DIAPH2,DTL,EDEM1,FGFR1OP,Gcn5l,GM2A,GMPPB,HEXA,HEXB,IKBKB,KIAA0196,LACTB2,MAPRE1,MATN2,MYO1D,NAGK,NCS1,SHOX2,SMU1,SNX1,SNX5,SSR1,WDR82
RNA Post-Transcriptional Modification, Molecular Transport, RNA Trafficking	36	33	C15orf63,C16orf80,CHERP,CSDA (includes EG:56449),DDX46,Gata,HAUS6,HNRNPA1,HNRNPR,IGF1,IGF2BP2,MATR3,MEPCE,MIR101,NAA16,PCBP1,PCBP2,PNN,PTBP1,QKI,RBM25,RBM39,RBM42,SF3A2,SF3B1,SF3B2,SLC39A14,SRD5A1,SRRM1,SRRT,SRSF3,SRSF7,SYNCRIP,TRPV2,ZC3H14
Cellular Assembly and Organization, Cell Morphology, Cellular Function and Maintenance	36	33	ADARB1,alcohol group acceptor phosphotransferase,ALX1,ATG7,ATG12 (includes EG:361321),ATG4B,CHTOP,CPVL,EYA4,G protein,GRK6,GYG1,GYS1,HNRNPA2B1,KIAA1199,KIAA0226L,KLHDC10,MAP1LC3B,MAP2K2,MOCOS,NEK9,NHP2L1,PIK3C3,PITPNC1,PRKCH,PRPF31,PRPF4B,PUM2,RB1CC1,SH3GLB1,SRPX,TGFBRAP1,TMEM160,TOE1,ZNF207
Cancer, Hematological Disease, Gene Expression	34	32	60S ribosomal subunit,BOP1,chymotrypsin,Collagen type xviii,EHBP1,EHD2,EIF2B2,EIF2S2,IFNGR2,IGF1R,IVNS1ABP,MYOF,RBM3,RPL3,RPL7,RPL9,RPL11,RPL13,RPL15,RPL18,RPL22,RPL24,RPL28,RPL30,RPL32,RPL36,RPL13A,RPL18A,RPL23A,RPL29 (includes EG:100039782),RPL35A,RPL37A,SCG2,SF3B5,SLC25A20
Cellular Assembly and Organization, DNA Replication, Recombination, and Repair, Cancer	34	32	ANKRD28,APLP2,APPBP2,BAG6,BRD1,C1orf151-NBL1/NBL1,CCNI,CDC123,CDK16,CPEB1,CRELD2,DDX27,EFEMP1,Granzyme,HIST2H2BE (includes others),HMGCL,IL12 (family),KDM4B,KRIT1,MGLL,MLLT3,MLLT10,NOMO1 (includes others),PBRM1,PTS,RCHY1,RNF126,SERPINB6,SGTA,SIRT7,SRGN,SYT11,TIP60,VPS41 (includes EG:218035),ZNF512B
Cell Morphology, Infectious Disease, Cellular Assembly and Organization	34	32	AHCYL1,AHCYL2,CD3,CDKN2AIP,CDS2,CSTF2,CTSD,ENOSF1,GABPB1,HCCS,HIST1H2AC,Igh (family),NAGA,NEDD4L,NT5DC2,ORAI3,P-TEFb,PDCD6IP,RAB27A,RYBP,SATB1,SCGN,SEC14L1,SLC5A3,SNF8,SYTL2,TMEM2,TPST1,TSC22D3,TSEN2,TSEN34,TSG101,TSPAN9,VRK3,ZNF211
Cell Death and Survival, Cell Cycle, Organismal Injury and Abnormalities	34	32	AGPAT5,AHNAK,AP-3,AP3D1,CAD,CAV1,CDKN2A,CRNKL1,DHRS12,DHX15,DKK1,DNM2,Histone h3,KIF3C,KRT18,MKI67,MTDH,Na+,K+ -ATPase,NPM1,PSG4,RBM28,RWDD2B,SMARCA4,SMCHD1,SMTN,SPATA20,SPATS2L,ST6GALNAC4,STC1,SUMO1,TRIM24,TRIM28,TRO,ZDHHC11,ZNF271
Cell Cycle, DNA Replication, Recombination, and Repair, Organismal Development	34	32	26s Proteasome,ABTB2,ACTN1,ACTN4,ASUN,BRCA1,CDC25B,CDK1,CDK2,CSNK2B,DACT1,EEF1A1,EZR,HCFC1R1,Hsp90,HSP90AB1,LRP5L,NUCB1,ODC1,OGT,PPP6C,PRKDC,RNA polymerase II,SMYD2,SOWAHC,SUPT5H,TCF3,THAP3,TNNT1,VDR,WT1,ZC3H15,ZCCHC10,ZNF259,ZNF281
Lipid Metabolism, Small Molecule Biochemistry, Vitamin and Mineral Metabolism	32	31	AACS,ACLY,ALDOC,ATOX1,ATP7B,C5orf28,CAPRIN2,CCNG1,CYP51A1,DHCR7,DYRK2,EBP,EGR3,FDFT1,FDPS,Frizzled,HMG CoA synthase,HMGCS1,IDI1,INSIG1,INSIG2,LSS,Mir122a,b,MSMO1,PDHA1,PDHB,PDLIM7,PLC,PLEKHA4,POR,SC5DL,SQLE,SREBF2,TFAP2C,ZMYND11
Cellular Assembly and Organization, Cellular Compromise, Drug Metabolism	32	31	BAG3,CELF1,CLNS1A,DNAJB1,DNAJC1,DNAJC2,DNAJC3,DNAJC4,DNAJC6,DNAJC22,DNAJC,DYNC2LI1,ECM1 (includes EG:100332249),FN1 (includes EG:100005469),G3BP1,GPI,HSP,Hsp22/Hsp40/Hsp90,HSPA4,HSPA13,HSPA14,HSPB8,HSPBP1,LOXL2,MAGED1,MAGED2,NOL8,RRAGD,SLC25A1,ST13,STIP1,TMA16 (includes EG:290686),TRIAP1,VLDL-cholesterol,WDR45
RNA Post-Transcriptional Modification, Developmental Disorder, Hematological Disease	32	31	ABHD2,CDC37,CORO1C,DDAH2,DDX21,FBXO11,Gm-csf,HMGB2,HSPE1,MDFIC,MLF1,Ndpk,NME5,NR3C1,PRRC2C,PTP4A2,RABGGTB,RDH11,Rnr,RPS5,RPS6,RPS15,RPS19,RPS21,RPS15A,RPS17/RPS17L,RPS6KA2,RPS6KA5,Rsk,SLC1A7,SON,TPST2,WDR12,WDR37,ZNF266
Cancer, Hematological Disease, Dermatological Diseases and Conditions	31	31	ALDH3A2,Alpha tubulin,ANKRD17,ARL8B,Beta Tubulin,CCT2,CLTB,ENOX1,ENOX2,Gamma tubulin,HBEGF,HDGFRP3,hexokinase,HIP1 (includes EG:192154),MSRB2,PAXIP1,PDCL3,PDS5A,PGRMC1,RAD21,RGS2 (includes EG:19735),SEL1L3,SETD3,SMC3,STX10,TPT1 (includes EG:100043703),TSPAN15,TUBA4A,TUBB3,TUBB,TUBB2A,TUBB2B,TUBB4B,VBP1,WAPAL
Cell Death and Survival, Cellular Development, Cellular Growth and Proliferation	31	31	ACTR10,Alp,ATF2,ATF3,Creb,DCTN3,DDIT3,DDX17,DGCR2,DROSHA,EGR1,EXOSC5,FOSL1,GLOD4,IMPA1,JUND,LDHA,LDL,LDLR,MADD,MAP2K1/2,MCAM,NFYA,NUP210,PARP1,PNRC2,PWP1,RARA,RFK,RNASEH1,RNASEH2A,TMBIM6,TMPO,TNFRSF10B,TNFRSF11B
Cancer, Connective Tissue Disorders, Developmental Disorder	30	30	AGA,AGFG1,Androgen-AR,ATP synthase,B3GNT2,CACYBP,CHN2,CSPG4,DLAT,ERK1/2,EXT1,EXT2,FAM59A,GALNS,GALNT2,MMD,MPZL1,NEU1,OSTF1,PGM1,PIGF,Pki,PPAP2C,PRKD3,PRR7,PRUNE2,RAB22A,RAB4B,S100A1,SRI,Stat5 dimer,TRAP1,TRIM2,UBAC1,VGF
Cell Cycle, DNA Replication, Recombination, and Repair, Cancer	29	30	ANAPC5,APC (complex),APC-CDC20,BBX,CCND1,CDC27,CDC20 (includes EG:107995),CENPA,CENPI,CENPN,CIB1,CKAP2,CLPB,Cyclin A,E3 RING,FAM57A,FBXO5,FOXM1,GTPBP4,KIF20B,LIMCH1,MBD5,MELK,MFSD6,MTMR1,PAPOLA,PBLD,PLK2,PLK3,PLK4,PLK,PTOV1,PTTG1,TMSB15A,YARS2
Cancer, Cellular Growth and Proliferation, Gene Expression	29	30	BHLHE40,BHLHE41,BLCAP,CCNL1,CD44,CDK10,CDKN3,DBNDD1,DCBLD2,DDX3X,DENND5B,DNMT1,estrogen receptor,ETS2,FGFR4,FXYD5,GLB1,IGF2R,KRAS,LRP12,MCFD2,mediator,MT1E,MYL6B,NAMPT,PDGF BB,PEG10,Serine Protease,SLC7A11,SPARC,TFAP2A,TGFA,TGFBR2,TGFBR3,tyrosine kinase
Hereditary Disorder, Cellular Assembly and Organization, Cellular Function and Maintenance	29	30	AMPH,Ap1 gamma,AP1G2,AP1S1,Ap2 alpha,AP2S1,ARFGAP1,BIN1,BMP2K,BRP44L,CHMP2A,DHPS,EPS15,GCDH,GTPASE,KDELR2,KDELR,KIF15,LDLRAP1,NEK3,NUMB,PPAN,RAB23,RAB11FIP2,RAB3GAP1,RAB3GAP2,REEP5,SERINC3,SLC16A1,SMAP1,STIL,SV2A,TUBGCP3,TUBGCP4,Vegf
Molecular Transport, Energy Production, Nucleic Acid Metabolism	28	29	adenosine-tetraphosphatase,aldo,ARHGEF40,ATP5A1,ATP5B,ATP5C1,ATP5D,ATP5G1,ATP5G3,ATP5J2,ATP5L,ATP5O,ATP6AP1,ATP6V0A2,ATP6V0E1,ATP6V0E2,ATP6V1A,ATP6V1D (includes EG:299159),ATP6V1E1,ATP6V1F,BANP,CYTH2,GYPC,H+-transporting two-sector ATPase,HMGN2,KIR,OGG1,PEBP1,PITPNA,PITPNB,Pkc(s),SNX10,STC2,STXBP3,Vacuolar H+ ATPase
Cell Death and Survival, Cellular Compromise, Cell-To-Cell Signaling and Interaction	28	29	ADCK3,BCAR3,CHP1,ENO2,ENSA,ETFB,FAF2,FHIT,FNTA,GCHFR,IPO7,JAM,KCTD15,MIRLET7,NF1 (includes EG:18015),NOSIP,Par6,RAB31,RABAC1,Ral,RALA,RALB,RALGAPB,Rap,RAP2B,Ras,RGL1,RIN2,RIT1 (includes EG:19769),RPRD1A,RRAS2,SPG21,TRIO,TSN,XPOT
Digestive System Development and Function, Hepatic System Development and Function, Organ Development	28	29	ALAS1,Aspartyl Protease,BACE2,C14orf1,CAK,CCDC99,CDK1/2,CDKN1A,CSAD,Cyclin A/Cdk2,Cyclin D1/cdk4,DNA-directed DNA polymerase,DNPEP,FLAD1,KNTC1,MKRN1,MPHOSPH6,MRPS12,N4BP2L2,NUDT21,PDE4DIP,PEX2 (includes EG:19302),POLD3,POLDIP2,POLE2,POLQ,PRIM1,REV1 (includes EG:316344),SAT1,SEPHS1,TCF25,TLE1,TMEM66,ZBED5,ZFYVE16
