# Supplementary material for: Identification of Genes Potentially Regulated by Human Polynucleotide Phosphorylase (hPNPaseold-35) Using Melanoma as a Model
Source: PLoS One. 2013 Oct 15;8(10):e76284. doi: 10.1371/journal.pone.0076284 (PMC3797080; doi:10.1371/journal.pone.0076284)
Supplement: Table S2 — Results for IPA biological functions (A), toxicity lists (B), canonical pathways (C) and most significant networks (D) associated with genes dysregulated as a result of hPNPaseold-35 overexpression. (XLSX) [file pone.0076284.s012.xlsx]

## Sheet: S2a
Table S1a. Top biological functions associated with hPNPaseold-35 overexpression identified by IPA
Category	p-value	Molecules
Cell Cycle	7.5E-16-3E-03	IER3,PNN,SMARCA4,CHEK2,TXNIP,CREG1,TM4SF1,MSH6,PRNP,KDM2A,WNK1,ADM,SPRY2,BTG3,CHAF1A,RBM3,CDKN1C,LIMK1,AURKB,ZFYVE26,FCGR2A,BCL6,BRCA1,TPM1,GMNN,FAS,APC,NCOA3,MAPK7,SLBP,DEGS1,GSPT1,MELK,CCNB2,THBS1,ERBB3,SSRP1,CSE1L,BRD4,APAF1,SEPT4,PPP1R12A,H2AFX,DUSP3,RPS6KA2,PARP2,GAS2L1,BNIP3,PRPF4,PARP1,CENPE,BLM,UQCRFS1,POLA1,POLH,HMOX1,UBE2B,NR4A3,PTN,CUL4A,CD44,PTEN,ZWINT,HDAC1,BORA,SPDL1,PLK2,RPS6KA3,MT…
Cancer	4.33E-15-2.97E-03	IER3,CHEK2,TXNIP,MSH6,PRNP,MCM6,WNK1,ADM,PELI1,MCAM,SPRY2,RPS19,NRXN3,BTG3,LIMK1,FCGR2A,BRCA1,TPM1,GMNN,MAPK7,GPR126,ILF3,CCNB2,SSRP1,SF3B1,CSE1L,NUP37,AK2,HILPDA,SLC7A5,ADK,H2AFX,TMEM97,FDXR,PARP2,STOML2,BNIP3,PAK4,EIF1AX,CLCN3,SRD5A1,POLA1,EIF3A,HMOX1,ARNTL,EIF4B,LRP8,NEK3,NR4A3,PTN,PDLIM5,PTEN,F2R,MC1R,HDAC1,TNFAIP3,NUP107,SKP1/SKP1P2,PLK2,RPS6KA3,BAD,CAPN3,SIRT1,HIPK1,FN1,RREB1,BHLHE40,LRIG1,…
Cellular Growth and Proliferation	1.76E-13-2.05E-03	IER3,CDC45,PNN,CHEK2,TXNIP,CREG1,MSH6,PRNP,WNK1,ADM,MCAM,PELI1,SPRY2,RPS19,BTG3,LIMK1,BRCA1,TPM1,GMNN,MAPK7,ILF3,GTPBP1,S100B,C9orf78,CSE1L,AK2,HILPDA,PPP1R12A,SLC7A5,ADK,H2AFX,FDXR,GAS2L1,BNIP3,RFC1,ATP6V0E1,PAK4,SUMO1,ZMAT3,DKK3,POLA1,EIF3A,HMOX1,EIF4B,ARNTL,NR4A3,PTN,PTEN,F2R,MC1R,HDAC1,GNG4,TNFAIP3,SKP1/SKP1P2,PLK2,RPS6KA3,MTF2,BAD,SIRT1,HIPK1,FN1,LRIG1,BHLHE40,MBD3,RGS4,EIF2AK2,TBX3,MCM7,AKR…
Cell Death and Survival	4.69E-13-2.93E-03	IER3,CDC45,CHEK2,FBL,TXNIP,PRNP,ADM,MCAM,RPS19,SPRY2,BRCA1,FCGR2A,TPM1,GMNN,MAPK7,ILF3,S100B,SSRP1,CSE1L,ADK,H2AFX,OAS1,FDXR,PARP2,USE1,SNRK,STOML2,BNIP3,RFC1,PAK4,ABCE1,SUMO1,ZMAT3,CLCN3,DKK3,EIF3A,UQCRFS1,HMOX1,LRP8,NEK3,PEX11B,PTN,NR4A3,PTEN,F2R,MC1R,HDAC1,TNFAIP3,PLK2,RPS6KA3,BAD,CAPN3,SIRT1,HIPK1,FN1,IFI6,BHLHE40,LRIG1,ATP6AP1,RGS4,NEFL,EIF2AK2,TBX3,BIK,CHMP5,MSRB2,DUSP5,MCM2,NFKB1,KLF5,HSPA…
Gastrointestinal Disease	1.5E-12-5.48E-04	SERPINA1,TXNIP,ATP1B3,TM4SF1,PRNP,MSH6,WNK1,MCAM,RPS19,CHAF1A,CDKN1C,BRCA1,GMNN,NCOA3,APC,MCM4,FAS,MELK,CCNB2,THBS1,ERBB3,NUP37,CSE1L,ABCD3,SLC7A5,TMEM97,FDXR,HIST1H4A (includes others),BNIP3,EIF1AX,PARP1,FBXO21,PLAT,SRD5A1,EIF3A,HMOX1,LRP8,GART,CD44,PPAP2B,PTEN,F2R,ZWINT,HDAC1,ATAD5,MTUS1,AKAP13,CAPN3,SIRT1,MKI67,MSH2,FN1,SOD2,ARID1A,DNAJB9,EPB41L3,MAGEA3/MAGEA6,PML,ASXL1,HOXB2,RGS4,EIF2AK2,SLC7…
DNA Replication, Recombination, and Repair	4.53E-11-2.05E-03	SERPINA1,SMARCA4,DUT,CHEK2,FBL,PRNP,MSH6,MCM6,ADM,RAD23A,CHAF1A,CDKN1C,AURKB,BRCA1,BCL6,TDG,GMNN,APC,FAS,MCM4,MAPK7,CCR5,CCNB2,ERBB3,SSRP1,BRD4,APAF1,ADK,H2AFX,PARP2,BNIP3,RFC1,SUMO1,PARP1,ZMAT3,CENPE,BLM,POLA1,POLH,HMOX1,UBE2B,NR4A3,PTN,CUL4A,RPA3,PTEN,F2R,ZWINT,HDAC1,AP1AR,PLK2,AKAP13,BAD,SIRT1,TRRAP,HIPK1,MSH2,FN1,SOD2,ARID1A,NCAPH,PML,BAZ1B,RGS4,EIF2AK2,MED1,MCM7,BIK,TK2,GTF3A,MCM2,NFKB1,CTNN…
Cellular Development	6.59E-10-2.65E-03	IER3,CHEK2,TXNIP,CREG1,MSH6,PRNP,WNK1,ADM,MCAM,SPRY2,RPS19,BTG3,LIMK1,BRCA1,FCGR2A,TPM1,GMNN,MAPK7,S100B,CSE1L,PPP1R12A,ADK,FDXR,PARP2,GAS2L1,SNRK,BNIP3,RFC1,PAK4,ZMAT3,DKK3,EIF3A,HMOX1,EIF4B,ARNTL,PEX11B,NR4A3,PTN,PTEN,F2R,MC1R,HDAC1,GNG4,TNFAIP3,RPS6KA3,MTF2,BAD,SIRT1,FN1,BHLHE40,LRIG1,RGS4,EIF2AK2,TBX3,BIK,AKR1B10,MCM2,DUSP5,NFKB1,CHD7,KLF5,COL4A1,CTNNB1,NRAS,FANCA,ATP2C1,FANCC,ACVR1,ANP32A,IL…
Gene Expression	8.05E-10-2.05E-03	IER3,CBY1,SMARCA4,CHEK2,GTF2F1,TXNIP,CREG1,PRNP,SMYD2,PELI1,CENPJ,BTG3,CHAF1A,RBM3,CDKN1C,RRBP1,LMCD1,FCGR2A,BCL6,BRCA1,TDG,GMNN,APC,NCOA3,FAS,FUBP3,CCR5,MELK,SLBP,MAPK7,ILF3,MTERFD1,SSRP1,CSE1L,PPP1R12A,H2AFX,SART3,OAS1,DUSP3,BCLAF1,SAP30,ZC3HAV1,RFC1,SUMO1,PARP1,RORA,PMS2P1,null,BLM,ACTR2,PAIP1,DKK3,STAP2,ARNTL,EIF4B,LRP8,TCFL5,EIF5,UBE2B,NR4A3,CUL4A,CD44,PTEN,F2R,MC1R,MRPL17,HDAC1,TNFAIP3,CTDS…
Hematological Disease	8.9E-10-1.98E-03	IER3,CBY1,CHEK2,USP10,MSH6,MCM6,MCAM,RPS19,CHAF1A,LIMK1,AURKB,BCL6,FCGR2A,BRCA1,FAS,APC,CCR5,THBS1,SF3B1,CSE1L,H2AFX,BCLAF1,LGMN,null,PARP1,BLM,POLA1,HMOX1,TMPRSS6,NEK3,CD44,SAR1B,PTEN,F2R,HDAC1,SNX1,TNFAIP3,BAD,SIRT1,MKI67,FN1,MSH2,SOD2,TGM2,PML,CCL18,ASXL1,EIF2AK2,TNS1,STAT3,SEC23B,DUSP5,NFKB1,LAMP1,CTNNB1,COL4A1,NRAS,FANCA,FANCC,ZFP36L1,IL6ST,DLC1,YES1,PSMB9,FOXO1,IL1R1,TUBA1A,IDH2,BCL2L11,PIT…
Dermatological Diseases and Conditions	7.91E-08-2.05E-03	EIF2AK2,MCM7,GBP1,DUSP5,PRNP,WNK1,ADM,MCAM,CTNNB1,NRAS,LIMK1,CD44,AURKB,KRAS,PHIP,PTEN,F2R,MIA,MC1R,MCM4,NCOA3,YES1,CLK2,TUBA1A,BCL2L11,VDR,CSE1L,MKI67,TRRAP,FN1,SOD2,KIDINS220,MAGEA3/MAGEA6,BIRC5,IGFBP3
Endocrine System Disorders	1.65E-07-9.18E-04	SERPINA1,HOXB2,CHEK2,HMGA2,TXNIP,DDR1,STAT3,CDK1,MSH6,LRP8,GART,MCAM,H2AFY,QKI,CTNNB1,COL4A1,NRAS,KRAS,CD44,BRCA1,PTEN,LTK,F2R,BARD1,NCOA3,E2F3,YES1,CCNB2,TUBA1A,ERBB3,ADAM17,KAT2B,SSRP1,SKP1/SKP1P2,SEMA3C,HILPDA,STC1,FZD3,FN1,MSH2,H2AFX,TGIF2,ARID1A,MTHFD2,LRIG1,TGM2,TF,IGFBP3
Reproductive System Disease	1.65E-07-2.25E-03	SERPINA1,IER3,CBY1,DUT,CHEK2,TXNIP,MSH6,PRNP,HSPA2,ACTG2,MCAM,SPRY2,RPS19,BTG3,CDKN1C,ZFYVE26,AURKB,BCL6,BRCA1,TPM1,GMNN,MCM4,NCOA3,FAS,APC,CCNB2,APOBEC3B,THBS1,ERBB3,SSRP1,PTP4A1,MNS1,CSE1L,AK2,HILPDA,SEPT4,APAF1,SLC7A5,CADM1,H2AFX,null,MR1,PARP1,DDR1,SRD5A1,EIF3A,HMOX1,TMPRSS6,ARNTL,GEM,LRP8,PRRC2C,GART,UBE2B,PTN,CUL4A,CD44,PPAP2B,PTEN,F2R,HDAC1,SNX1,STAM,ACTR3,SKP1/SKP1P2,PLK2,MKKS,SIRT1,MKI67…
Immunological Disease	2.17E-07-1.35E-03	PARP1,CHEK2,TNS1,BLM,MSH3,USP10,STAT3,POLA1,CDK1,MSH6,HMOX1,LAMP1,DKK1,NEK3,NRAS,CHAF1A,CD44,KRAS,PTEN,APC,FAS,SNX1,PSMB9,TNFAIP3,THBS1,BAD,SIRT1,HDAC2,H2AFX,MSH2,FN1,YWHAZ,SOD2,BCLAF1,PPP1R2,ARID5B,PML,BIN3,IGFBP3
Post-Translational Modification	4.47E-07-3.16E-06	EIF2AK2,CHEK2,MCM7,TK2,WNK1,HSPA2,HSPA4,ADM,CD4,CHAF1A,FANCA,CDKN1C,RFK,FANCC,LIMK1,PELI2,AURKB,FCGR2A,TWF1,LTK,ACVR1,GMNN,DARS,POLR2H,APC,FAS,MELK,MAPK7,YES1,CLK2,NPTN,HFE,S100B,THBS1,MAP2K6,PRKAR2B,CAPZA1,PDK1,BRD4,ADK,MAP4K3,RPS6KA2,ATXN7,SNRK,IGFBP3,SKAP2,ELF1,SUMO1,TLK1,ROCK1,CAMKK2,DUSP6,DDR1,CD47,STAP2,CDK1,PHACTR1,NEK3,DKK1,PTN,MYLK,CD44,PTEN,F2R,RANBP9,BARD1,IL1RAP,ADAM17,KAT2B,PLK2,RPS6…
Cellular Movement	5.54E-07-2.97E-03	IER3,SERPINA1,SSH1,SMARCA4,TM4SF1,PRNP,ADM,MCAM,LASP1,RPS19,SPRY2,RTN4,ACP5,LIMK1,FCGR2A,BRCA1,TPM1,FAS,APC,NCOA3,MAPK7,CCR5,CCNB2,ERBB3,THBS1,S100B,PTP4A1,CSE1L,SEPT4,APAF1,CADM1,LGMN,PAK4,SUMO1,PARP1,RORA,PLAT,CLCN3,DDR1,DKK3,STAP2,HMOX1,GEM,LRP8,PEX11B,PTN,IL37,CD44,PTEN,PPAP2B,F2R,MC1R,HDAC1,TNFAIP3,FH,ACTR3,RPS6KA3,SIRT1,FN1,SOD2,KIDINS220,LRIG1,BHLHE40,PLP1,TGM2,CCL18,HOXB2,RGS4,NRP2,HEBP1,…
Developmental Disorder	5.71E-07-1.82E-03	IER3,RGS4,SMARCA4,SC5DL,MED1,TK2,FERMT1,STAT3,NFKB1,MUT,KLF5,ACTG2,ADM,INSIG2,SPRY2,COL4A1,CTNNB1,ARHGAP35,NRAS,CDKN1C,LMCD1,ATP2C1,BCL6,BRCA1,LTK,TPM1,ZFP36L1,IL6ST,MAPK7,GPR126,FOXO1,TUBA1A,ERBB3,HFE,MTERFD1,MAP2K6,SFRP1,PITPNA,STC1,APAF1,TFAP2C,H2AFX,MAP3K4,MCOLN1,BIRC5,PAK4,P2RX4,SOCS7,DDX11/DDX12P,PARP1,VCL,PLAT,PCSK6,BLM,JAG1,CLCN3,DDR1,RBPJ,HMOX1,ARNTL,TMPRSS6,PARL,DKK1,HLA-DQB1,CASR,RAB23…
Connective Tissue Disorders	6.21E-07-9.66E-04	SMARCA4,PARP1,CHEK2,PLAT,PCSK6,STAT3,RBPJ,NFKB1,DKK1,null,INSIG2,SPRY2,CTNNB1,ARHGAP35,SDC2,NRAS,RAB23,NR4A3,ACP5,ATP2C1,CD44,KRAS,FCGR2A,BRCA1,PTEN,APC,FAS,IL6ST,CCR5,SNX1,IL1R1,THBS1,BCL2L11,RPS6KA3,JMJD6,APAF1,SIRT1,HIPK1,MSH2,FN1,MAP3K4,null,BMPR1A,STOML2
Skeletal and Muscular Disorders	6.21E-07-1.64E-03	SERPINA1,IER3,SMARCA4,CHEK2,FBL,PRNP,WNK1,SPRY2,SH3BP4,ACP5,CDKN1C,RTN4,LIMK1,LMCD1,AURKB,BCL6,BRCA1,FCGR2A,APC,FAS,MELK,CCR5,THBS1,CSE1L,APAF1,PREPL,OAS1,null,STOML2,PARP1,PLAT,BLM,DKK3,SRD5A1,HMOX1,PARL,NR4A3,CD44,PTEN,F2R,CYP51A1,SNX1,PLK2,RPS6KA3,CAPN3,SOCS5,SIRT1,HIPK1,MSH2,FN1,RREB1,SSX2IP,BHLHE40,TGM2,NEFL,RGS4,ZMYND8,PPP1CB,GTF3A,HADH,STAT3,DUSP5,NFKB1,LAMP1,PKM,INSIG2,CTNNB1,ARHGAP35,NRA…
Connective Tissue Development and Function	8.14E-07-2.9E-03	IER3,CBY1,EIF2AK2,CHEK2,MED1,TXNIP,STAT3,NFKB1,WNK1,KLF5,ADM,BTG3,CTNNB1,NRAS,FANCA,RTN4,FANCC,MT1H,BCL6,BRCA1,TPM1,ANP32A,FAS,FOXO1,THBS1,MAP2K6,ERBB3,PRKAR2B,SFRP1,BRD4,APAF1,PARP2,BNIP3,RFC1,IGFBP3,SOCS7,SUMO1,PARP1,CAMKK2,ROCK1,HMGA2,VCL,BLM,JAG1,STAP2,POLH,HMOX1,EIF4E,SMC3,DDX3X,PLSCR1,null,MAP4,HRASLS,CASR,NR4A3,PTEN,RANBP9,F2R,MIA,SNAI2,HDAC1,TFRC,E2F3,VDR,MVP,RPS6KA3,HDAC2,SIRT1,MSH2,FN1,…
Protein Synthesis	9.95E-07-2.63E-03	SERPINA1,IER3,CBY1,EIF2AK2,CHEK2,ENDOU,PRNP,NFKB1,MID1,ADM,SERPINE2,KATNA1,RAD23A,CD4,NRAS,CHAF1A,FANCA,RBM3,RRBP1,COX10,FANCC,MT1H,BCL6,FCGR2A,RPS27L,GMNN,DARS,ZFP36L1,FAS,APC,USP11,ILF3,FOXO1,HFE,THBS1,CPN1,CAPZA1,BANP,CNOT8,LGMN,USE1,BIN3,IFT52,SKAP2,IGFBP3,EIF1AX,SUMO1,PJA1,null,PLAT,PCSK6,PAIP1,EIF3A,CDK1,RABGAP1L,NCKAP1,EIF4G1,EIF4E,EIF4B,TMPRSS6,ARNTL,DKK1,EIF5,UBE2B,RAB23,SLC7A1,CUL4A,PTE…
Organismal Survival	1.23E-06-8.71E-06	CBY1,SMARCA4,CHEK2,FBL,TXNIP,PRNP,MSH6,ACTG2,ADM,PELI1,RPS19,SPRY2,NRXN3,RTN4,CDKN1C,LIMK1,AURKB,BRCA1,BCL6,GMNN,FAS,NCOA3,APC,MAPK7,CCR5,THBS1,ERBB3,SSRP1,BRD4,APAF1,ADK,H2AFX,PARP2,USE1,PAK4,SOCS7,POGZ,PARP1,PLAT,BLM,CLCN3,CTSA,DDR1,HMOX1,ARNTL,PARL,LRP8,NOVA1,PEX11B,UBE2B,NR4A3,CD44,PTEN,F2R,CYP51A1,HDAC1,TNFAIP3,STAM,BAD,SIRT1,HIPK1,MKI67,TRRAP,FN1,MSH2,SOD2,KIDINS220,EPB41L3,TGM2,B3GALNT1,AT…
RNA Post-Transcriptional Modification	1.34E-06-2.05E-03	EIF2AK2,PARP1,TGM2,FANCC,JRK,CDK1,PRNP,EIF4E,EIF4B
Cellular Compromise	2.02E-06-1.64E-03	PARP1,HPSE,BLM,CD47,POLH,RAD51C,CLASP2,GEM,MID1,MCAM,KATNA1,FANCA,FANCC,CD44,BRCA1,FAS,APC,THBS1,S100B,SLC7A5,MSH2,H2AFX,REV3L,PARP2,SHROOM2,GAS2L1,DSTN
Tumor Morphology	2.08E-06-2.97E-03	CDC45,NRP2,EIF2AK2,BIK,TXNIP,STAT3,USP10,MCM2,NFKB1,PRNP,MSH6,KLF5,MCAM,SPRY2,NRAS,CBLL1,RTN4,LIMK1,BRCA1,TPM1,ANP32A,APC,NCOA3,FAS,MAPK7,FOXO1,IL1R1,ERBB3,THBS1,MAP2K6,BCL2L11,SFRP1,APAF1,STC1,BIRC5,IGFBP3,PARP1,ROCK1,HMGA2,HPSE,B4GALT5,ZMAT3,PLAT,PCSK6,JAG1,CD47,CDK1,HMOX1,DKK1,null,SDC2,CASR,PTN,CD44,KRAS,PHIP,PTEN,F2R,HDAC1,SNAI2,BAD,HDAC2,SIRT1,FN1,LEF1,CCL18,PML,TF
Cardiovascular System Development and Function	2.14E-06-2.97E-03	IER3,SMARCA4,TXNIP,TM4SF1,ACTG2,ADM,LASP1,SPRY2,CELF2,RTN4,BCL6,BRCA1,TDG,TPM1,FAS,APC,NCOA3,MAPK7,CCR5,ERBB3,THBS1,H2AFX,LGMN,RPS6KA2,IFT52,PAK4,PARP1,PLAT,BLM,HMOX1,TMPRSS6,ARNTL,GEM,PTN,CD44,PPAP2B,PTEN,PDLIM5,F2R,CYP51A1,MLYCD,SRI,TNFAIP3,MKKS,SIRT1,HIPK1,FN1,SOD2,TGM2,BAZ1B,PML,RGS4,NRP2,EIF2AK2,TBX3,MED1,CHD7,KLF5,TAZ,COL4A1,TFB1M,CTNNB1,NRAS,LTK,ACVR1,ZFP36L1,IL6ST,FOXO1,IL1R1,MAP2K6,STC1,…
Embryonic Development	2.14E-06-2.98E-03	IER3,VAMP5,SMARCA4,PRNP,HSPA2,ADM,SPRY2,CDKN1C,BCL6,BRCA1,TDG,TPM1,NCOA3,FAS,APC,MAPK7,ERBB3,THBS1,S100B,SSRP1,SF3B1,CSE1L,SEPT4,APAF1,CADM1,H2AFX,RPS6KA2,IFT52,BNIP3,PAK4,PARP1,IL1RAPL1,PLAT,BLM,CLCN3,TMPRSS6,ARNTL,LRP8,MTMR2,UBE2B,NR4A3,CUL4A,CD44,PPAP2B,PTEN,F2R,CYP51A1,HDAC1,SNX1,SRI,STAM,MKKS,CAPN3,BAD,SIRT1,HIPK1,FN1,MSH2,SOD2,TGM2,BAZ1B,HOXB2,RGS4,EIF2AK2,NRP2,TBX3,MED1,BIK,CHMP5,STAT3,NFK…
Organ Development	2.14E-06-2.98E-03	VAMP5,SMARCA4,RGS4,NRP2,MED1,TBX3,BIK,PRNP,CHD7,LAMP1,HSPA2,HSPA4,ADM,TAZ,SPRY2,ZFX,CEP57,CTNNB1,TFB1M,FANCA,CDKN1C,FANCC,BCL6,BRCA1,TDG,TPM1,ACVR1,APC,ZFP36L1,MAPK7,FOXO1,MAP2K6,S100B,ERBB3,THBS1,BCL2L11,SFRP1,SEPT4,TFAP2C,CADM1,H2AFX,RPS6KA2,IFT52,PAK4,HMGA2,VCL,PCSK6,IL1RAPL1,JAG1,DUSP6,RBPJ,ADAMTS1,VGF,TMPRSS6,RAD51C,LRP8,MTMR2,MBNL1,QKI,UBE2B,MYLK,NR4A3,CUL4A,PTEN,CYP51A1,HDAC1,SNAI2,SPAG9,S…
Organismal Development	2.14E-06-2.98E-03	VAMP5,CBY1,SMARCA4,SC5DL,TM4SF1,PRNP,SOCS6,HSPA2,ADM,LASP1,SPRY2,CHAF1A,CDKN1C,ACP5,BCL6,BRCA1,TDG,TPM1,NCOA3,FAS,APC,MAPK7,CCR5,GPR126,ILF3,CCNB2,ERBB3,THBS1,S100B,SF3B1,CSE1L,BRD4,SEPT4,APAF1,CADM1,H2AFX,LGMN,BCLAF1,RPS6KA2,PARP2,ZC3HAV1,IFT52,PAK4,SOCS7,PARP1,PLAT,IL1RAPL1,CLCN3,CTSA,BLM,DDR1,HMOX1,TMPRSS6,ARNTL,LRP8,GEM,MTMR2,PEX11B,UBE2B,PTN,NR4A3,CUL4A,CD44,PTEN,PPAP2B,F2R,CYP51A1,HDAC1,SNX…
Tissue Development	2.14E-06-2.98E-03	VAMP5,SMARCA4,PRNP,HSPA2,ADM,MCAM,CENPJ,SPRY2,CDKN1C,LIMK1,BCL6,BRCA1,FCGR2A,TDG,TPM1,NCOA3,APC,MAPK7,THBS1,ERBB3,S100B,SEPT4,CADM1,H2AFX,RPS6KA2,IFT52,PAK4,IL1RAPL1,DDR1,TMPRSS6,LRP8,MTMR2,UBE2B,NR4A3,CUL4A,CD44,PTEN,F2R,CYP51A1,HDAC1,SRI,STAM,ACTR3,MKKS,AKAP13,CAPN3,SIRT1,MSH2,FN1,SOD2,TGM2,BAZ1B,NEFL,RGS4,NRP2,MED1,TBX3,BIK,FERMT1,STAT3,CHD7,LAMP1,HSPA4,TAZ,ZFX,CEP57,CD4,TFB1M,CTNNB1,FANCA,FAN…
Cell Signaling	3.16E-06-3.16E-06	RANBP9,GMNN,SUMO1,DARS,APC,FAS,IL1RAP,HFE,CAPZA1,CDK1,TGFBR3,CAPN3,DKK1,CHAF1A,FANCA,FANCC,PML,SKAP2
Cell Morphology	3.2E-06-2.92E-03	CBY1,CHEK2,SC5DL,TXNIP,PRNP,SMYD2,MID1,ADM,SPRY2,ACP5,CDKN1C,RTN4,RRBP1,LIMK1,BRCA1,FCGR2A,TPM1,APC,FAS,MAPK7,CCR5,GPR126,ERBB3,S100B,THBS1,MNS1,BRD4,APAF1,SEPT4,ABCD3,H2AFX,CADM1,LGMN,BNIP3,STOML2,PAK4,PARP1,RORA,ZMAT3,BLM,CLCN3,DKK3,HMOX1,TMPRSS6,ARNTL,GEM,PARL,LRP8,PEX11B,SLC25A14,UBE2B,CUL4A,CD44,PTEN,F2R,MKKS,BAD,SIRT1,TRRAP,FN1,SOD2,ARID1A,IFI6,BHLHE40,PLP1,TGM2,PML,ASXL1,NEFL,MED1,BIK,TNS1…
Renal and Urological Disease	4.1E-06-2.4E-03	SERPINA1,HADH,STAT3,MCM2,PKM,MUT,ADM,DAZAP2,ETFDH,CTNNB1,BTG3,CD4,NRAS,CHAF1A,MT1H,AURKB,BRCA1,LTK,TPM1,GMNN,FAS,APC,CCR5,GSPT1,FOXO1,PCCB,TUBA1A,IL1R1,MAP2K6,IDH2,THBS1,SF3B1,SFRP1,HILPDA,APAF1,CD164,UMPS,USE1,ZC3HAV1,BIRC5,LMBRD1,RPL18,PLAT,DUSP6,NUMA1,NCKAP1,UQCRFS1,H2AFY,MAP4,QKI,UBE2B,KRAS,CD44,PTEN,EPAS1,null,TFRC,HDAC1,MLYCD,IL1RAP,FH,ADAM17,MBP,NDUFAF3,AKAP13,BPGM,MKI67,FN1,RREB1,SOD2,NLR…
Cellular Function and Maintenance	4.61E-06-3E-03	SERPINA1,SSH1,GABARAPL1,SMARCA4,CBY1,CHEK2,TXNIP,TM4SF1,PRNP,MID1,ANKRD27,ADM,MCAM,LASP1,CENPJ,BTG3,CHAF1A,RTN4,RRBP1,LIMK1,BRCA1,BCL6,FCGR2A,TPM1,FAS,APC,CCR5,CCNB2,S100B,THBS1,SSRP1,APAF1,SEPT4,PPP1R12A,ABCD3,H2AFX,USE1,GAS2L1,BNIP3,STOML2,PAK4,SOCS7,SUMO1,PARP1,RORA,ZMAT3,PLAT,CENPE,CLCN3,BLM,DDR1,DKK3,STAP2,HMOX1,ARNTL,PARL,GEM,PEX11B,SLC25A14,PTN,CD44,PTEN,F2R,HDAC1,SNX1,MLYCD,TNFAIP3,BORA,N…
Reproductive System Development and Function	5.67E-06-2.56E-03	MED1,TBX3,BIK,CHD7,LAMP1,HSPA2,ADM,SERPINE2,HSPA4,LASP1,ZFX,CTNNB1,CEP57,COL4A1,CD4,FANCA,RRBP1,CDKN1C,FANCC,BCL6,BRCA1,ACVR1,NCOA3,ZFP36L1,MAPK7,THBS1,BCL2L11,SFRP1,MNS1,ZNF384,BRD4,SEPT4,APAF1,STC1,TFAP2C,CADM1,MAP3K4,H2AFX,PAK4,HMGA2,DDR1,RBPJ,VGF,SRD5A1,ADAMTS1,HMOX1,TMPRSS6,ARNTL,GEM,RAD51C,PARL,LRP8,MTMR2,MAP4,QKI,UBE2B,NR4A3,CUL4A,CD44,PTEN,EPAS1,F2R,SNAI2,E2F3,SPAG9,ADAM17,VDR,PLK2,MKKS,B…
Hematological System Development and Function	7.27E-06-2.23E-03	SERPINA1,CBY1,SMARCA4,CHEK2,TXNIP,PRNP,ADM,RPS19,CDKN1C,FCGR2A,BRCA1,BCL6,APC,FAS,CCR5,CCNB2,THBS1,APAF1,H2AFX,BCLAF1,LGMN,HIST1H4A (includes others),MR1,GAS2L1,SNRK,PARP1,RORA,PLAT,BLM,DDR1,DKK3,STAP2,HMOX1,ARNTL,TMPRSS6,PARL,PTN,CUL4A,CD44,PTEN,F2R,TNFAIP3,STAM,SOCS5,BAD,SIRT1,FN1,MSH2,SOD2,BHLHE40,PLP1,TGM2,PML,ASXL1,EIF2AK2,MED1,BIK,STAT3,DUSP5,NFKB1,CHD7,LAMP1,TAZ,ZFX,CTNNB1,CD4,FANCA,FANCC,…
Cellular Assembly and Organization	7.34E-06-2.97E-03	SSH1,SMARCA4,CBY1,TM4SF1,PRNP,ANKRD27,MID1,ADM,LASP1,SPRY2,CENPJ,BTG3,CHAF1A,RRBP1,RTN4,CDKN1C,LIMK1,AURKB,FCGR2A,BCL6,BRCA1,TPM1,GMNN,MCM4,FAS,APC,CCR5,CCNB2,THBS1,S100B,SSRP1,BRD4,APAF1,SEPT4,PPP1R12A,ABCD3,H2AFX,PARP2,GAS2L1,USE1,STOML2,PAK4,SUMO1,PARP1,CENPE,PLAT,BLM,DDR1,DKK3,HMOX1,PARL,GEM,PEX11B,UBE2B,NR4A3,PTN,CD44,PTEN,F2R,ZWINT,HDAC1,SNX1,BORA,NUP107,ACTR3,NUP133,PLK2,MKKS,AKAP13,SIRT1,…
Nucleic Acid Metabolism	1E-05-2.28E-03	SMARCA4,CHD1L,PARP1,DUT,RORA,TXNIP,TK2,BLM,STAT3,RHOBTB3,DTYMK,CDK1,MSH6,AK2,PKM,BAD,ABCD3,SIRT1,ADK,KATNA1,MSH2,NUDT1,NRAS,ATP2C1
Small Molecule Biochemistry	1E-05-2.28E-03	SMARCA4,PARP1,RORA,DUT,SLC7A8,SLC7A11,TXNIP,TK2,BLM,STAT3,RHOBTB3,CDK1,MSH6,PKM,KATNA1,NRAS,NR4A3,SLC7A1,ATP2C1,PTEN,CHD1L,S100B,FH,SLC25A12,DTYMK,SLC17A6,AK2,ABCD3,BAD,SIRT1,SLC7A5,ADK,MSH2,NUDT1
Respiratory Disease	1.07E-05-2.65E-03	HOXB2,CHEK2,RPS27A,AKR1B10,FERMT1,STAT3,MCM2,MSH6,WNK1,MUT,NRXN3,CTNNB1,NRAS,CDKN1C,AURKB,BRCA1,LTK,APC,FAS,PSMB9,CCNB2,ALDOC,TUBA1A,SLC5A3,THBS1,ERBB3,SFRP1,EIF2C1,SLC7A5,DGKD,NUDT1,null,UMPS,BIN3,BIRC5,IGFBP3,PLAT,CLCN3,DUSP6,ADAMTS1,CDK1,EIF3A,ELK3,POLH,EIF4E,PARL,GART,H2AFY,QKI,KRAS,CD44,PTEN,EPAS1,HDAC1,E2F3,ADAM17,TGFBR3,HDAC2,MSH2,FN1,SOD2,DKC1,MAGEA3/MAGEA6
Infectious Disease	1.5E-05-2.4E-03	SERPINA1,CLDND1,IER3,GABARAPL1,FBL,TXNIP,HIST2H2BE (includes others),PRNP,WNK1,DAZAP2,PELI1,SPRY2,RAD23A,CHAF1A,LIMK1,BRCA1,NCOA3,FAS,CCR5,ILF3,APOBEC3B,SSRP1,SF3B1,CSE1L,CD164,SART3,DUSP3,OAS1,BCLAF1,null,MR1,USE1,ZC3HAV1,RGPD5 (includes others),ATP6V0E1,ABCE1,SUMO1,RPL18,PARP1,FBXO21,PMS2P1,PLAT,NUP160,ACTR2,POLA1,EIF3A,UQCRFS1,HMOX1,ARNTL,TCFL5,RAB13,UBE2B,CD44,F2R,GOSR2,null,HDAC1,TNFAIP3,NUP…
Hematopoiesis	2.31E-05-1.34E-03	SMARCA4,EIF2AK2,MED1,BIK,STAT3,DUSP5,NFKB1,PRNP,CHD7,LAMP1,ADM,TAZ,RPS19,CD4,CTNNB1,FANCC,FCGR2A,BCL6,BRCA1,FAS,APC,IL6ST,FOXO1,IL1R1,BCL2L11,SFRP1,MAF,RNF128,APAF1,MYO1E,LGMN,SNRK,BIRC5,ELF1,PARP1,RORA,JAG1,BLM,ROGDI,RBPJ,CD47,STAP2,HMOX1,TMPRSS6,EIF4E,ARNTL,DKK1,PLSCR1,HLA-DQB1,SLC7A1,CUL4A,KRAS,EPAS1,TFRC,SNAI2,TNFAIP3,BCL3,ADAM17,VDR,MBP,JMJD6,SOCS5,BAD,BPGM,SIRT1,MSH2,FN1,SOD2,BMPR1A,DKC1,LE…
Neurological Disease	4.34E-05-2.28E-03	SERPINA1,IER3,SMARCA4,CHEK2,DUT,FBL,PRNP,WNK1,SPRY2,SH3BP4,CDKN1C,RTN4,LIMK1,LMCD1,BRCA1,BCL6,FAS,APC,CCNB2,ERBB3,CSE1L,APAF1,PREPL,OAS1,null,SOCS7,PARP1,RORA,CTSA,CLCN3,DKK3,SRD5A1,HMOX1,ARNTL,PARL,LRP8,MTMR2,CD44,SAR1B,PTEN,CYP51A1,HDAC1,SNX1,PLK2,RPS6KA3,SOCS5,CAPN3,SIRT1,HIPK1,MKI67,MSH2,SOD2,RREB1,SSX2IP,EPB41L3,BHLHE40,PLP1,TGM2,NEFL,RGS4,ZMYND8,PPP1CB,GTF3A,HADH,DUSP5,NFKB1,LAMP1,PKM,TAZ,C…
Skeletal and Muscular System Development and Function	5.11E-05-2.4E-03	VAMP5,RGS4,SMARCA4,MED1,TBX3,SC5DL,NFKB1,PRNP,KLF5,ADM,TAZ,SPRY2,CTNNB1,ACP5,CDKN1C,TPM1,APC,IL6ST,MAPK7,FOXO1,S100B,ERBB3,MAP2K6,THBS1,SFRP1,RIPK4,BIRC5,IGFBP3,ROCK1,HMGA2,PLAT,VCL,JAG1,DDR1,RBPJ,CD47,HMOX1,DKK1,MBNL1,CASR,NR4A3,MYLK,KRAS,PTEN,CYP51A1,HDAC1,E2F3,BCL3,SRI,TNFAIP3,ADAM17,VDR,TGFBR3,CAPN3,HDAC2,CHKB,FN1,ARID5B,CENPF,LEF1,TGM2,STRA13
Organ Morphology	1.39E-04-2.97E-03	SC5DL,TXNIP,HSPA2,ADM,LASP1,CDKN1C,LIMK1,BCL6,BRCA1,TDG,FAS,NCOA3,MAPK7,CCNB2,ERBB3,THBS1,MNS1,BRD4,SEPT4,APAF1,CADM1,H2AFX,LGMN,PAK4,SOCS7,PLAT,CLCN3,CTSA,DDR1,SRD5A1,HMOX1,ARNTL,TMPRSS6,LRP8,PARL,UBE2B,CUL4A,CD44,PTEN,PDLIM5,F2R,CYP51A1,MKKS,BAD,SIRT1,FN1,SOD2,BHLHE40,TGM2,BAZ1B,ASXL1,TBX3,MED1,BIK,TNS1,TK2,HADH,STAT3,NFKB1,MUT,SERPINE2,HSPA4,CD4,CTNNB1,NRAS,FANCC,MT1H,ZFP36L1,IL6ST,YES1,BCL2L1…
Tissue Morphology	1.46E-04-2.92E-03	SERPINA1,CBY1,SMARCA4,SC5DL,TXNIP,PRNP,MID1,ADM,SPRY2,RPS19,ACP5,CDKN1C,ZFYVE26,BRCA1,FCGR2A,BCL6,TPM1,FAS,MAPK7,CCR5,CCNB2,ERBB3,THBS1,CSE1L,BRD4,APAF1,CADM1,H2AFX,LGMN,BCLAF1,MR1,PAK4,SOCS7,PARP1,PLAT,BLM,CLCN3,DDR1,DKK3,HMOX1,TMPRSS6,ARNTL,PARL,LRP8,HRASLS,PTN,NR4A3,CUL4A,CD44,PPAP2B,PTEN,F2R,CYP51A1,SNX1,TNFAIP3,STAM,RPS6KA3,BAD,SIRT1,TRRAP,MSH2,FN1,SOD2,TTC19,PLP1,BHLHE40,TGM2,PML,BAZ1B,ASXL…
Free Radical Scavenging	1.48E-04-2.05E-04	SERPINA1,CLCN3,MSRB2,CD47,UQCRFS1,PRNP,HMOX1,ALDH3A2,SPRY2,MYLK,ACP5,LIMK1,FANCC,CD44,FCGR2A,PTEN,F2R,EPAS1,FAS,TFRC,CCR5,SPAG9,S100B,PRDX6,BCL2L11,MTUS1,STC1,SIRT1,YWHAZ,FN1,SOD2,NLRX1,FDXR,TGM2,BNIP3,TF
Organismal Injury and Abnormalities	1.94E-04-1.87E-03	PARP1,CLCN3,STAT3,MSH6,PRNP,NFKB1,LAMP1,PLSCR1,CTNNB1,FANCC,KRAS,MT1H,PTEN,F2R,EPAS1,APC,IL6ST,CCR5,TNFAIP3,TUBA1A,IL1R1,BCL3,THBS1,S100B,IDH2,ADAM17,STAM,BCL2L11,SF3B1,BAD,BPGM,ADK,MSH2,SOD2,BMPR1A,PLP1,TGM2
Lymphoid Tissue Structure and Development	2.51E-04-1.71E-03	SMARCA4,EIF2AK2,MED1,BIK,TXNIP,STAT3,NFKB1,PRNP,CHD7,LAMP1,ADM,CTNNB1,CD4,NRAS,CDKN1C,FANCC,MT1H,FCGR2A,BRCA1,BCL6,APC,FAS,IL6ST,YES1,FOXO1,CCNB2,IL1R1,BCL2L11,MAF,RNF128,APAF1,INPP4B,LGMN,BIRC5,BIN3,PARP1,RORA,CTSA,BLM,RBPJ,CD47,STAP2,HMOX1,DKK1,HLA-DQB1,KRAS,PTEN,F2R,CYP51A1,SNAI2,TNFAIP3,BCL3,ADAM17,VDR,MBP,TGFBR3,JMJD6,BAD,SOCS5,FN1,DKC1,LEF1,ARID5B,PLP1,BHLHE40,TGM2,ASXL1
Cell-To-Cell Signaling and Interaction	2.56E-04-3.05E-03	CLCN3,FERMT1,STAT3,CD47,EIF3A,HMOX1,DKK1,MCAM,CASR,CD44,FCGR2A,PTEN,F2R,CDK5RAP3,FAS,IL6ST,HDAC1,CCR5,THBS1,ZEB2,JMJD6,HDAC2,CADM1,FN1,TGM2,IGFBP3,PAK4
Metabolic Disease	3.57E-04-1.64E-03	MUT,LMBRD1,SOD2,ETFDH,MLYCD,PCCB,IDH2,HADH,SAR1B,PITPNA
Nervous System Development and Function	4.6E-04-2.98E-03	SOCS7,IL1RAPL1,CLCN3,NCKAP1,PRNP,LRP8,QKI,NR4A3,RTN4,LIMK1,PTEN,HDAC1,YES1,IL1RAP,BCL2L11,STAM,ZEB2,MBP,MKKS,TFAP2C,BAD,HDAC2,SOD2,LEF1,PLP1
Cell-mediated Immune Response	4.63E-04-9.01E-04	SMARCA4,PARP1,RORA,BIK,BLM,STAT3,STAP2,PRNP,CHD7,LAMP1,DKK1,HLA-DQB1,CD4,CTNNB1,FANCC,BCL6,BRCA1,FCGR2A,APC,FAS,SNAI2,CCNB2,FOXO1,IL1R1,TNFAIP3,BCL3,ADAM17,BCL2L11,MBP,MAF,RNF128,APAF1,JMJD6,BAD,SOCS5,LEF1,PLP1,BHLHE40,BIRC5
Hepatic System Disease	5.48E-04-5.48E-04	PKM,DKK1,CTNNB1,ERBB3,STAT3,TM4SF1,KRAS,BIRC5,EIF4E,PTEN
Hair and Skin Development and Function	6.8E-04-1.93E-03	SNAI2,MED1,FERMT1,STAT3,VDR,KLF5,MKI67,FN1,PAQR3,CASR,LRIG1,CCNG2,KRAS,PTEN
Molecular Transport	7.33E-04-2.08E-03	SRSF7,CBY1,SLC7A8,SLC7A11,TXNIP,ATP1B3,STAT3,CHMP5,SEC23B,PRNP,WNK1,ADM,LASP1,KATNA1,CEP57,SLC25A17,ATP2C1,MT1H,BCL6,FCGR2A,SLC25A11,ANP32A,FAS,YES1,CCR5,SLBP,THBS1,S100B,SLC5A3,ERBB3,PRDX6,HFE,BCL2L11,SLC25A12,ENSA,ZNF384,PITPNA,ABCD3,SLC7A5,KIF20A,SERINC5,MCOLN1,SEC23A,BIN3,ATP6V0E1,P2RX4,IGFBP3,SUMO1,TLK1,ROCK1,NUP160,CTSA,CLCN3,RABGAP1L,NCKAP1,HMOX1,EIF4E,ARNTL,DDX3X,LRP10,RAB13,PLSCR1,SLC25A…
Protein Trafficking	7.33E-04-7.33E-04	SUMO1,FAS,CBY1,TFRC,BORA,THBS1,NCKAP1,RABGAP1L,AKAP13,ADM,KATNA1,MT1H,BCL6,FCGR2A,BIN3,IGFBP3
Hereditary Disorder	8.84E-04-1.64E-03	IER3,SERPINA1,RGS4,NEFL,FBL,ZMYND8,PPP1CB,HADH,GTF3A,DUSP5,NFKB1,WNK1,PKM,CTNNB1,SH3BP4,KAZN,CDKN1C,LMCD1,LIMK1,MT1H,BCL6,PSMB9,TUBA1A,PRDX6,BANP,PITPNA,PREPL,RAD54L,PARP1,CAMKK2,B4GALT5,GBP1,DKK3,RHOBTB3,SRD5A1,HMOX1,LAPTM4B,LAMB1,CD44,SAR1B,PTEN,CYP51A1,PPM1B,PLK2,BTN3A1,SOCS5,YWHAZ,BMPR1A,SSX2IP,PPP1R2,BHLHE40,TGM2
Inflammatory Disease	9.2E-04-1.64E-03	FAS,IL6ST,PARP1,CCR5,PLAT,IL1R1,THBS1,BCL2L11,STAT3,NFKB1,null,FN1,CD44,FCGR2A,PTEN
Digestive System Development and Function	9.38E-04-2.92E-03	SMARCA4,MED1,TBX3,SC5DL,TXNIP,TK2,FERMT1,HADH,NFKB1,CHD7,MUT,PKM,KLF5,INSIG2,SPRY2,CTNNB1,NRAS,CDKN1C,MT1H,BRCA1,ACVR1,FAS,APC,IL6ST,MAPK7,CCR5,ERBB3,THBS1,BCL2L11,SFRP1,BRD4,PITPNA,APAF1,CADM1,MTHFD2,MCOLN1,BIN3,IGFBP3,SOCS7,SUMO1,PCSK6,JAG1,CTSA,CLCN3,TMPRSS6,DKK1,PEX11B,LAMB1,KRAS,PTEN,CYP51A1,SNAI2,BCL3,ADAM17,VDR,TGFBR3,JMJD6,FN1,SOD2,BMPR1A,ARID5B,LEF1
Visual System Development and Function	1.21E-03-1.21E-03	SNAI2,THBS1,ADAM17
Hepatic System Development and Function	1.41E-03-2.92E-03	MUT,SOD2,TK2,NRAS,KRAS,MT1H,BIN3,TMPRSS6,PITPNA,BRD4
Inflammatory Response	1.54E-03-3.05E-03	CLCN3,STAT3,CD47,HMOX1,ARNTL,RPS19,CDKN1C,FANCC,CD44,FCGR2A,PTEN,F2R,FAS,IL6ST,SNAI2,CCR5,THBS1,ZEB2,BCL2L11,JMJD6,HDAC2,CIB1,FN1,DKC1,TGM2
Amino Acid Metabolism	1.58E-03-2.05E-03	SLC7A5,SLC7A8,SLC7A11,S100B,FH,SLC7A1,SLC17A6,PTEN
RNA Damage and Repair	1.64E-03-1.64E-03	CHEK2,EIF5
Cardiovascular Disease	1.76E-03-1.76E-03	F2R,ADM,CYP51A1,TFRC,MED1,FOXO1,TUBA1A,JAG1
Respiratory System Development and Function	2.05E-03-2.05E-03	SIRT1,CBY1,FN1,SOD2,SPRY2,CLK2,NRAS,ADAM17,HMOX1,PML
Renal and Urological System Development and Function	2.22E-03-2.22E-03	MYO1E,SIRT1,YES1,TNS1,BCL2L11,BHLHE40,CDKN1C,MT1H
Carbohydrate Metabolism	2.44E-03-2.44E-03	BAD,MGAM,HPSE,PLAT,LYPLA2,PRDX6,GUSB,CD44,PTEN,PITPNA
Protein Degradation	2.63E-03-2.63E-03	IER3,SERPINA1,SUMO1,PJA1,CHEK2,ENDOU,PCSK6,PLAT,NCKAP1,ARNTL,TMPRSS6,SERPINE2,RAD23A,UBE2B,RAB23,CUL4A,COX10,PTEN,APC,SNX1,USP11,ADAM17,CPN1,BANP,UBE2E1,CAPN3,HDAC2,SIRT1,SOD2,LGMN,TGM2,USE1,PML,IFT52

## Sheet: S2b
Table S1b. Toxicologically related functionalities and pathways associated with hPNPaseold-35 overexpression identified by IPA
Ingenuity Toxicity Lists	-log(p-value)	Ratio	Molecules
p53 Signaling	5.22E00	0.158	FAS,HDAC1,SNAI2,CHEK2,MED1,THBS1,KAT2B,APAF1,SIRT1,SERPINE2,CTNNB1,BIRC5,PML,BRCA1,PTEN
Decreases Transmembrane Potential of Mitochondria and Mitochondrial Membrane	4.57E00	0.147	BARD1,FAS,CHEK2,BCL2L11,CHMP5,CD47,NFKB1,APAF1,SOD2,SLC25A14,IFI6,TGM2,BIRC5,BNIP3
Cardiac Hypertrophy	4.27E00	0.0898	IER3,RGS4,PARP1,PLAT,STAT3,HMOX1,NFKB1,KLF5,ACTG2,ADM,CTNNB1,LMCD1,PTEN,LTK,TPM1,F2R,EPAS1,IL6ST,MAPK7,TNFAIP3,MAP2K6,ADAM17,VDR,AKAP13,SIRT1,HDAC2,SOD2,BIRC5,P2RX4
Cell Cycle: G2/M DNA Damage Checkpoint Regulation	3.27E00	0.17	CHEK2,YWHAZ,CCNB2,YWHAB,KAT2B,SKP1/SKP1P2,CDK1,BRCA1
Cardiac Necrosis/Cell Death	3.04E00	0.0928	IL6ST,PARP1,E2F3,TXNIP,TNFAIP3,S100B,BCL2L11,STAT3,HMOX1,SIRT1,ADM,HDAC2,SOD2,CASR,PTN,BIRC5,PTEN,BNIP3
Renal Necrosis/Cell Death	3.03E00	0.0757	IER3,RGS4,EIF2AK2,BIK,PLAT,CHMP5,HMOX1,NFKB1,PRNP,CTNNB1,CASR,KRAS,MT1H,CD44,BCL6,PTEN,FAS,TFRC,TNFAIP3,MAP2K6,BCL2L11,SSRP1,BAD,SOD2,RAD21,BIRC5,BNIP3,ZNF512B,IGFBP3
Increases Permeability Transition of Mitochondria and Mitochondrial Membrane	2.5E00	0.375	FAM162A,BIK,COX4I1
Increases Renal Damage	2.43E00	1.27E-01	ADM,PARP1,PLAT,CTNNB1,IL1R1,THBS1,CD44,FCGR2A
PPARα/RXRα Activation	1.99E00	8.14E-02	ACVR1,NCOA3,MED1,IL1RAP,BCL3,IL1R1,IL1RAPL1,MAP2K6,PRKAR2B,SOS2,NFKB1,TGFBR3,NRAS,KRAS
Increases Liver Damage	1.92E00	9.78E-02	FAS,IL6ST,CCR5,MED1,PLAT,IL1R1,STAT3,CD44,BNIP3
Mechanism of Gene Regulation by Peroxisome Proliferators via PPARα	1.83E00	9.47E-02	DUT,MED1,MRPL11,IL1R1,NRAS,PRKAR2B,SOS2,KRAS,NFKB1
Increases Transmembrane Potential of Mitochondria and Mitochondrial Membrane	1.82E00	1.2E-01	FAS,HSPA4,SOD2,ARID1A,BCL2L11,MSRB2
Liver Proliferation	1.66E00	7.41E-02	FAS,IL6ST,HDAC1,DLC1,MED1,THBS1,NFKB1,SIRT1,SLC7A5,CTNNB1,PTN,MT1H,PML,TF
TGF-β Signaling	1.64E00	9.3E-02	ACVR1,HDAC1,BMPR1A,NRAS,MAP2K6,VDR,SOS2,KRAS
Pro-Apoptosis	1.58E00	1.19E-01	APAF1,BAD,FAS,BIK,BCL2L11
Increases Depolarization of Mitochondria and Mitochondrial Membrane	1.53E00	1.76E-01	EIF2AK2,TGM2,PRNP
Long-term Renal Injury Anti-oxidative Response Panel (Rat)	1.47E00	1.67E-01	SOD2,MT1H,HMOX1
Anti-Apoptosis	1.41E00	1.25E-01	HDAC1,TNFAIP3,BIRC5,BNIP3
Genes associated with Chronic Allograft Nephropathy (Human)	1.29E00	1.43E-01	FN1,COL4A1,THBS1
Aryl Hydrocarbon Receptor Signaling	1.25E00	6.96E-02	APAF1,NCOA3,FAS,SMARCA4,ALDH3A2,CHEK2,MCM7,MED1,TGM2,POLA1,NFKB1
LXR/RXR Activation	1.19E00	7.26E-02	SERPINA1,CYP51A1,IL1RAP,IL1R1,IL1RAPL1,HADH,IL37,NFKB1,TF
Cardiac Fibrosis	1.13E00	6.63E-02	KLF5,FN1,SOD2,PLAT,TNFAIP3,BMPR1A,STAT3,VDR,BCL6,NFKB1,HMOX1
NF-κB Signaling	1.12E00	6.31E-02	HDAC1,EIF2AK2,TNFAIP3,IL1R1,MAP2K6,DDR1,NFKB1,TGFBR3,HDAC2,BMPR1A,NRAS,KRAS,IL37
Oxidative Stress	1.1E00	8.77E-02	SOD2,PRDX6,STAT3,NFKB1,BRCA1
Increases Cardiac Dilation	1.06E00	1.15E-01	F2R,ROCK1,BNIP3
VDR/RXR Activation	1.02E00	7.69E-02	NCOA3,MED1,FOXO1,CASR,VDR,IGFBP3
Positive Acute Phase Response Proteins	9.21E-01	1E-01	SERPINA1,SOD2,HMOX1
Protection from Hypoxia-induced Renal Ischemic Injury (Rat)	8.17E-01	2.5E-01	HMOX1
Hypoxia-Inducible Factor Signaling	8.14E-01	7.14E-02	EIF1AX,SUMO1,null,UBE2B,UBE2E1
Hepatic Stellate Cell Activation	7.76E-01	8.57E-02	TGFBR3,CCR5,NFKB1
Liver Necrosis/Cell Death	7.44E-01	5.39E-02	IER3,FAS,IL6ST,YES1,MED1,BCL2L11,STAT3,NFKB1,HMOX1,ADM,SIRT1,SOD2,MT1H
Increases Cardiac Proliferation	7.26E-01	8.11E-02	CTNNB1,BMPR1A,HMOX1
Biogenesis of Mitochondria	7.14E-01	1E-01	EPAS1,COX10
Increases Renal Proliferation	6.47E-01	5.94E-02	KLF5,SUMO1,CTNNB1,STAT3,PTP4A1,MT1H
Hepatic Cholestasis	6.4E-01	5.56E-02	MAP3K4,IL1RAP,IL1R1,IL1RAPL1,BCL3,PRKAR2B,IL37,NFKB1
Acute Renal Failure Panel (Rat)	6.16E-01	6.45E-02	ADM,DNAJB9,CD44,HMOX1
Cell Cycle: G1/S Checkpoint Regulation	6E-01	6.35E-02	HDAC2,HDAC1,E2F3,SKP1/SKP1P2
RAR Activation	5.54E-01	5.14E-02	SMARCA4,PARP1,MED1,PRKAR2B,KAT2B,PML,NFKB1,PTEN,IGFBP3
Negative Acute Phase Response Proteins	5.5E-01	1.25E-01	TF
Hepatic Fibrosis	4.89E-01	5.38E-02	FN1,CCR5,COL4A1,THBS1,IGFBP3
Increases Liver Hyperplasia/Hyperproliferation	4.81E-01	6E-02	SIRT1,AKR1B10,STAT3
Fatty Acid Metabolism	4.54E-01	5.04E-02	CYP51A1,ALDH3A2,HADH,SLC27A3,SRD5A1,DHRS2
Increases Damage of Mitochondria	4.37E-01	9.09E-02	FAS
Primary Glomerulonephritis Biomarker Panel (Human)	4.37E-01	9.09E-02	IER3
Cytochrome P450 Panel - Substrate is a Sterol (Human)	3.57E-01	7.14E-02	CYP51A1
Cytochrome P450 Panel - Substrate is a Sterol (Mouse)	3.57E-01	7.14E-02	CYP51A1
Cytochrome P450 Panel - Substrate is a Sterol (Rat)	3.57E-01	7.14E-02	CYP51A1
Recovery from Ischemic Acute Renal Failure (Rat)	3.57E-01	7.14E-02	COL4A1
Swelling of Mitochondria	3.35E-01	6.67E-02	FAS
Cholesterol Biosynthesis	3.15E-01	6.25E-02	SC5DL
Mitochondrial Dysfunction	2.93E-01	4.26E-02	NDUFB8,SOD2,COX4I1,COX10,CYB5A,UQCRFS1
PXR/RXR Activation	2.89E-01	4.48E-02	ALDH3A2,FOXO1,PRKAR2B
Increases Heart Failure	2.8E-01	5.56E-02	DUSP6
Nongenotoxic Hepatocarcinogenicity Biomarker Panel	2.24E-01	4.55E-02	PSMB9
Increases Liver Hepatitis	2.01E-01	4.17E-02	FAS

## Sheet: S2c
Table S1c. List of canonical pathways associated with hPNPaseold-35 overexpression identified by IPA
Ingenuity Canonical Pathways	-log(p-value)	Ratio	Molecules
Hereditary Breast Cancer Signaling	7.42E00	1.56E-01	POLR2H,BARD1,SMARCA4,HDAC1,CHEK2,BLM,RFC5,CDK1,MSH6,HDAC2,H2AFX,MSH2,PALB2,NRAS,FANCA,FANCC,KRAS,BRCA1,RFC1,PTEN
Role of BRCA1 in DNA Damage Response	6.21E00	2E-01	BARD1,SMARCA4,E2F3,CHEK2,RFC5,BLM,MSH6,MSH2,BRCC3,FANCA,FANCC,BRCA1,RFC1
p53 Signaling	5.34E00	1.56E-01	FAS,HDAC1,SNAI2,CHEK2,MED1,THBS1,KAT2B,APAF1,SIRT1,SERPINE2,CTNNB1,BIRC5,PML,BRCA1,PTEN
Cell Cycle Control of Chromosomal Replication	5.11E00	2.58E-01	CDC45,MCM4,CHEK2,MCM7,MCM5,RPA3,MCM2,MCM6
IGF-1 Signaling	3.85E00	1.24E-01	SOCS7,FOXO1,PRKAR2B,STAT3,SOS2,SOCS6,BAD,SOCS5,YWHAZ,NRAS,YWHAB,KRAS,IGFBP3
Acute Phase Response Signaling	3.83E00	1.01E-01	SOCS7,SERPINA1,IL6ST,IL1RAP,IL1R1,MAP2K6,STAT3,SOS2,NFKB1,HMOX1,SOCS6,SOCS5,FN1,SOD2,NRAS,KRAS,IL37,TF
EIF2 Signaling	3.7E00	9.41E-02	RPS27L,EIF1AX,RPL18,EIF2AK2,EIF3M,RPS27A,null,PPP1CB,PAIP1,RPL34,SOS2,EIF3A,EIF4G1,EIF4E,EIF2C1,RPS19,EIF5,NRAS,KRAS
ERK5 Signaling	3.69E00	1.54E-01	BAD,IL6ST,MAPK7,YWHAZ,RPS6KA2,YWHAB,NRAS,KRAS,WNK1,RPS6KA3
Apoptosis Signaling	3.67E00	1.26E-01	CAPN7,APAF1,CAPN3,BAD,FAS,PARP1,ROCK1,NRAS,BCL2L11,CDK1,KRAS,NFKB1
Cell Cycle: G2/M DNA Damage Checkpoint Regulation	3.54E00	1.67E-01	CHEK2,YWHAZ,CCNB2,YWHAB,KAT2B,SKP1/SKP1P2,CDK1,BRCA1
Mismatch Repair in Eukaryotes	3.49E00	2.08E-01	MSH2,RFC5,MSH3,MSH6,RFC1
IL-10 Signaling	3.41E00	1.28E-01	CCR5,IL1RAP,IL1R1,IL1RAPL1,MAP2K6,STAT3,IL37,NFKB1,FCGR2A,HMOX1
Estrogen Receptor Signaling	3.2E00	1.03E-01	POLR2H,NCOA3,SMARCA4,MED1,GTF2F1,MED13L,KAT2B,Gm6749,SOS2,TAF9,TAF5,TRRAP,NRAS,KRAS
Actin Cytoskeleton Signaling	2.97E00	7.98E-02	F2R,SSH1,APC,ROCK1,VCL,ACTR2,PPP1CB,ACTR3,SOS2,NCKAP1,ACTG2,PPP1R12A,FN1,ARHGAP35,NRAS,MYLK,LIMK1,KRAS,PAK4
Role of Osteoblasts, Osteoclasts and Chondrocytes in Rheumatoid Arthritis	2.87E00	7.98E-02	APC,IL1RAP,FOXO1,IL1RAPL1,IL1R1,MAP2K6,ADAM17,DKK3,SFRP1,NFKB1,FZD6,DKK1,BAD,FZD3,CTNNB1,BMPR1A,LEF1,ACP5,IL37
ERK/MAPK Signaling	2.83E00	8.25E-02	PPP1R10,ELF1,PPP1CB,PRKAR2B,DUSP6,Gm6749,STAT3,SOS2,ELK3,EIF4E,PPP1R12A,BAD,YWHAZ,NRAS,YWHAB,KRAS,PAK4
Mouse Embryonic Stem Cell Pluripotency	2.81E00	1.11E-01	FZD6,APC,FZD3,IL6ST,CTNNB1,BMPR1A,NRAS,LEF1,STAT3,SOS2,KRAS
Prostate Cancer Signaling	2.77E00	1.02E-01	BAD,FOXO1,CTNNB1,NRAS,LEF1,SOS2,SRD5A1,KRAS,NFKB1,PTEN
ErbB2-ErbB3 Signaling	2.7E00	1.33E-01	BAD,FOXO1,ERBB3,NRAS,STAT3,SOS2,KRAS,PTEN
Myc Mediated Apoptosis Signaling	2.65E00	1.33E-01	APAF1,BAD,FAS,YWHAZ,YWHAB,NRAS,SOS2,KRAS
FAK Signaling	2.61E00	9.9E-02	CAPN7,CAPN3,ACTG2,TNS1,VCL,NRAS,SOS2,KRAS,PTEN,PAK4
ATM Signaling	2.61E00	1.31E-01	TLK1,CHEK2,H2AFX,CCNB2,BLM,CDK1,BRCA1,SMC3
VEGF Signaling	2.57E00	1.01E-01	EIF1AX,ACTG2,BAD,ROCK1,FOXO1,null,VCL,NRAS,SOS2,KRAS
Ovarian Cancer Signaling	2.57E00	9.15E-02	APC,PRKAR2B,MSH6,FZD6,FZD3,MSH2,CTNNB1,NRAS,LEF1,KRAS,CD44,BRCA1,PTEN
Regulation of eIF4 and p70S6K Signaling	2.56E00	8E-02	RPS27L,EIF1AX,EIF3M,RPS27A,null,PAIP1,SOS2,EIF3A,EIF4G1,EIF4E,EIF2C1,RPS19,NRAS,KRAS
Acute Myeloid Leukemia Signaling	2.42E00	1.1E-01	BAD,NRAS,MAP2K6,LEF1,STAT3,SOS2,KRAS,PML,NFKB1
Type I Diabetes Mellitus Signaling	2.33E00	9.09E-02	SOCS7,APAF1,SOCS6,SOCS5,FAS,IL1RAP,HLA-DQB1,IL1R1,MAP2K6,CPE,NFKB1
Endometrial Cancer Signaling	2.32E00	1.23E-01	BAD,CTNNB1,NRAS,LEF1,SOS2,KRAS,PTEN
RhoA Signaling	2.27E00	9.65E-02	SEPT4,ACTG2,PPP1R12A,DLC1,ROCK1,ARHGAP35,PPP1CB,ACTR2,MYLK,LIMK1,ACTR3
Regulation of Actin-based Motility by Rho	2.24E00	1.01E-01	ACTG2,PPP1R12A,ROCK1,PPP1CB,ACTR2,MYLK,LIMK1,ACTR3,PAK4
Role of CHK Proteins in Cell Cycle Checkpoint Control	2.23E00	1.25E-01	TLK1,CHEK2,E2F3,RFC5,CDK1,BRCA1,RFC1
Actin Nucleation by ARP-WASP Complex	2.15E00	1.06E-01	PPP1R12A,ROCK1,NRAS,ACTR2,SOS2,ACTR3,KRAS
IL-6 Signaling	2.13E00	8.87E-02	IL6ST,IL1RAP,IL1R1,IL1RAPL1,NRAS,MAP2K6,STAT3,SOS2,IL37,KRAS,NFKB1
DNA Methylation and Transcriptional Repression Signaling	2.11E00	1.74E-01	MBD3,HDAC2,HDAC1,SAP30
Colorectal Cancer Metastasis Signaling	2.08E00	7E-02	APC,IL6ST,GNG4,MSH3,PRKAR2B,STAT3,SOS2,MSH6,NFKB1,FZD6,BAD,FZD3,MSH2,CTNNB1,NRAS,LEF1,KRAS,BIRC5
Factors Promoting Cardiogenesis in Vertebrates	2.07E00	9.57E-02	ACVR1,FZD6,TGFBR3,DKK1,APC,FZD3,CTNNB1,BMPR1A,LEF1
PTEN Signaling	2.05E00	8.15E-02	TGFBR3,BAD,FOXO1,BMPR1A,NRAS,BCL2L11,DDR1,SOS2,KRAS,NFKB1,PTEN
Methylmalonyl Pathway	2.03E00	1.67E-01	MUT,PCCB
FLT3 Signaling in Hematopoietic Progenitor Cells	2E00	1.05E-01	BAD,RPS6KA2,NRAS,STAT3,SOS2,KRAS,EIF4E,RPS6KA3
PI3K/AKT Signaling	1.95E00	7.64E-02	BAD,YWHAZ,FOXO1,CTNNB1,YWHAB,NRAS,SOS2,KRAS,NFKB1,PTEN,EIF4E
Oncostatin M Signaling	1.95E00	1.43E-01	EPAS1,IL6ST,NRAS,STAT3,KRAS
Role of Macrophages, Fibroblasts and Endothelial Cells in Rheumatoid Arthritis	1.94E00	6.31E-02	APC,IL6ST,ROCK1,IL1RAP,IL1RAPL1,IL1R1,MAP2K6,STAT3,DKK3,SFRP1,NFKB1,FZD6,DKK1,FZD3,FN1,DAAM1,CTNNB1,NRAS,LEF1,KRAS,IL37
Role of NANOG in Mammalian Embryonic Stem Cell Pluripotency	1.89E00	8.77E-02	FZD6,APC,FZD3,IL6ST,CTNNB1,BMPR1A,NRAS,STAT3,SOS2,KRAS
Integrin Signaling	1.86E00	7.25E-02	ROCK1,VCL,ACTR2,PPP1CB,SOS2,ACTR3,CAPN7,CAPN3,ACTG2,PPP1R12A,NRAS,MYLK,KRAS,PTEN,PAK4
PPAR Signaling	1.86E00	8.57E-02	MED1,IL1RAP,IL1R1,IL1RAPL1,NRAS,SOS2,IL37,KRAS,NFKB1
Purine Nucleotides De Novo Biosynthesis II	1.86E00	6.98E-02	GART,PAICS,null
2-oxobutanoate Degradation I	1.82E00	1.18E-01	MUT,PCCB
Angiopoietin Signaling	1.8E00	9.46E-02	BAD,FOXO1,NRAS,KRAS,BIRC5,NFKB1,PAK4
Mitotic Roles of Polo-Like Kinase	1.77E00	1.01E-01	CHEK2,CCNB2,RAD21,CDK1,PLK2,SMC3,CDC16
CNTF Signaling	1.74E00	1.09E-01	IL6ST,RPS6KA2,NRAS,STAT3,KRAS,RPS6KA3
Insulin Receptor Signaling	1.74E00	7.75E-02	PPP1R10,PPP1R12A,BAD,FOXO1,PPP1CB,NRAS,PRKAR2B,SOS2,KRAS,PTEN,EIF4E
PPARα/RXRα Activation	1.74E00	7.07E-02	ACVR1,NCOA3,MED1,IL1RAP,IL1R1,IL1RAPL1,MAP2K6,PRKAR2B,SOS2,NFKB1,TGFBR3,NRAS,KRAS
NF-κB Signaling	1.74E00	7.43E-02	HDAC1,EIF2AK2,TNFAIP3,IL1R1,MAP2K6,DDR1,NFKB1,TGFBR3,HDAC2,BMPR1A,NRAS,KRAS,IL37
JAK/Stat Signaling	1.74E00	1E-01	SOCS7,SOCS6,SOCS5,NRAS,STAT3,SOS2,KRAS
TGF-β Signaling	1.72E00	8.99E-02	ACVR1,HDAC1,BMPR1A,NRAS,MAP2K6,VDR,SOS2,KRAS
Molecular Mechanisms of Cancer	1.7E00	5.84E-02	APC,FAS,CHEK2,E2F3,FOXO1,MAP2K6,BCL2L11,PRKAR2B,RBPJ,SOS2,NFKB1,FZD6,APAF1,BAD,FZD3,CTNNB1,BMPR1A,NRAS,LEF1,KRAS,BRCA1,PAK4
Glucocorticoid Receptor Signaling	1.7E00	6.12E-02	POLR2H,SUMO1,SMARCA4,NCOA3,MED1,GTF2F1,HSPA14,KAT2B,STAT3,SOS2,TAF9,TAF5,NFKB1,HSPA2,HSPA4,NRAS,CDKN1C,KRAS
Growth Hormone Signaling	1.67E00	9.21E-02	SOCS7,SOCS6,SOCS5,RPS6KA2,STAT3,IGFBP3,RPS6KA3
Tetrahydrofolate Salvage from 5,10-methenyltetrahydrofolate	1.66E00	1.82E-01	GART,MTHFD2
Rac Signaling	1.62E00	7.38E-02	NRAS,ACTR2,LIMK1,ACTR3,NCKAP1,KRAS,CD44,NFKB1,PAK4
Granzyme B Signaling	1.6E00	1.88E-01	APAF1,PARP1,NUMA1
Aryl Hydrocarbon Receptor Signaling	1.59E00	6.83E-02	APAF1,NCOA3,FAS,SMARCA4,ALDH3A2,CHEK2,MCM7,MED1,TGM2,POLA1,NFKB1
NGF Signaling	1.55E00	7.63E-02	MAPK7,MAP3K4,ROCK1,RPS6KA2,NRAS,SOS2,KRAS,NFKB1,RPS6KA3
Prolactin Signaling	1.55E00	8.75E-02	SOCS7,SOCS6,SOCS5,NRAS,STAT3,SOS2,KRAS
Glioblastoma Multiforme Signaling	1.45E00	6.71E-02	FZD6,APC,FZD3,E2F3,FOXO1,CTNNB1,NRAS,LEF1,SOS2,KRAS,PTEN
Chronic Myeloid Leukemia Signaling	1.44E00	7.62E-02	BAD,HDAC2,HDAC1,E2F3,NRAS,SOS2,KRAS,NFKB1
Pyridoxal 5'-phosphate Salvage Pathway	1.41E00	8.33E-02	HIPK1,EIF2AK2,MAPK7,MAP2K6,LIMK1,CDK1
GADD45 Signaling	1.4E00	1.36E-01	MAP3K4,CDK1,BRCA1
Thio-molybdenum Cofactor Biosynthesis	1.39E00	2E-01	MOCOS
Acyl Carrier Protein Metabolism	1.39E00	1.67E-01	AASDHPPT
Adenine and Adenosine Salvage VI	1.39E00	2E-01	ADK
CCR3 Signaling in Eosinophils	1.38E00	7.14E-02	PPP1R12A,ROCK1,GNG4,PPP1CB,NRAS,MYLK,LIMK1,KRAS,PAK4
Wnt/β-catenin Signaling	1.37E00	6.94E-02	ACVR1,FZD6,TGFBR3,DKK1,APC,FZD3,HDAC1,CTNNB1,LEF1,DKK3,SFRP1,CD44
mTOR Signaling	1.33E00	6.16E-02	RPS27L,EIF3M,RPS27A,EIF3A,EIF4G1,HMOX1,EIF4E,EIF4B,RPS6KA3,RPS19,NRAS,RPS6KA2,KRAS
Breast Cancer Regulation by Stathmin1	1.33E00	6.28E-02	PPP1R10,E2F3,ROCK1,GNG4,TUBA1A,PPP1CB,PRKAR2B,SOS2,CDK1,PPP1R12A,NRAS,LIMK1,KRAS
Role of JAK2 in Hormone-like Cytokine Signaling	1.33E00	1.11E-01	SOCS7,SOCS6,SOCS5,STAT3
p38 MAPK Signaling	1.32E00	7.69E-02	FAS,IL1RAP,IL1R1,IL1RAPL1,RPS6KA2,MAP2K6,Gm6749,IL37,RPS6KA3
Telomerase Signaling	1.3E00	7.77E-02	ELF1,HDAC2,HDAC1,DKC1,NRAS,SOS2,KRAS,ELK3
Germ Cell-Sertoli Cell Junction Signaling	1.3E00	6.71E-02	ACTG2,MTMR2,MAP3K4,CTNNB1,TUBA1A,NRAS,MAP2K6,LIMK1,KRAS,PPAP2B,PAK4
Assembly of RNA Polymerase II Complex	1.29E00	8.93E-02	POLR2H,GTF2F1,TAF9,TAF5,DR1
Melanocyte Development and Pigmentation Signaling	1.27E00	7.69E-02	MC1R,RPS6KA2,NRAS,PRKAR2B,SOS2,KRAS,RPS6KA3
ErbB Signaling	1.25E00	8.05E-02	FOXO1,ERBB3,NRAS,MAP2K6,SOS2,KRAS,PAK4
Agrin Interactions at Neuromuscular Junction	1.25E00	8.7E-02	ACTG2,LAMB1,ERBB3,NRAS,KRAS,PAK4
LXR/RXR Activation	1.24E00	6.62E-02	SERPINA1,CYP51A1,IL1RAP,IL1R1,IL1RAPL1,HADH,IL37,NFKB1,TF
Polyamine Regulation in Colon Cancer	1.24E00	1.03E-01	APC,CTNNB1,KRAS
Chemokine Signaling	1.22E00	8.22E-02	PPP1R12A,CCR5,PPP1CB,NRAS,LIMK1,KRAS
CDK5 Signaling	1.2E00	7.45E-02	PPP1R10,PPP1R12A,LAMB1,PPP1CB,NRAS,PRKAR2B,KRAS
Neuregulin Signaling	1.18E00	6.86E-02	BAD,ERBB3,NRAS,ADAM17,SOS2,KRAS,PTEN
GNRH Signaling	1.17E00	6.12E-02	MAPK7,MAP3K4,NRAS,MAP2K6,PRKAR2B,SOS2,KRAS,NFKB1,PAK4
Protein Kinase A Signaling	1.15E00	5.38E-02	PPP1R10,ROCK1,GNG4,PPP1CB,PRKAR2B,DUSP6,DUSP14,Gm6749,PTP4A1,DUSP5,NFKB1,AKAP13,PPP1R12A,BAD,YWHAZ,DUSP3,CTNNB1,YWHAB,LEF1,MYLK,PTEN,CDC16
Nur77 Signaling in T Lymphocytes	1.15E00	7.94E-02	APAF1,HDAC2,HDAC1,MAPK7,HLA-DQB1
Docosahexaenoic Acid (DHA) Signaling	1.14E00	8.16E-02	APAF1,BAD,BIK,FOXO1
Role of Tissue Factor in Cancer	1.13E00	7.02E-02	YES1,RPS6KA2,NRAS,LIMK1,KRAS,PTEN,EIF4E,RPS6KA3
NF-κB Activation by Viruses	1.13E00	7.32E-02	EIF2AK2,CCR5,CD4,NRAS,KRAS,NFKB1
Role of PKR in Interferon Induction and Antiviral Response	1.11E00	8.7E-02	APAF1,EIF2AK2,MAP2K6,NFKB1
Thyroid Cancer Signaling	1.11E00	9.52E-02	CTNNB1,NRAS,LEF1,KRAS
Flavin Biosynthesis IV (Mammalian)	1.1E00	1.25E-01	RFK
Uridine-5'-phosphate Biosynthesis	1.1E00	5E-02	UMPS
Fcγ Receptor-mediated Phagocytosis in Macrophages and Monocytes	1.08E00	6.86E-02	ACTG2,YES1,ACTR2,ACTR3,FCGR2A,HMOX1,PTEN
HMGB1 Signaling	1.08E00	7.07E-02	PLAT,IL1R1,NRAS,MAP2K6,KAT2B,KRAS,NFKB1
Triacylglycerol Degradation	1.06E00	9.09E-02	ABHD6,PRDX6,PNLIP
HER-2 Signaling in Breast Cancer	1.06E00	7.5E-02	BAD,FOXO1,ERBB3,NRAS,SOS2,KRAS
Melanoma Signaling	1.05E00	8.7E-02	BAD,NRAS,KRAS,PTEN
RhoGDI Signaling	1.04E00	5.58E-02	ACTG2,PPP1R12A,DLC1,ROCK1,GNG4,ARHGAP35,ACTR2,LIMK1,ACTR3,CD44,PAK4
B Cell Receptor Signaling	1.03E00	6.06E-02	BAD,MAP3K4,NRAS,MAP2K6,SOS2,KRAS,BCL6,NFKB1,FCGR2A,PTEN
Ephrin Receptor Signaling	1.03E00	5.5E-02	ROCK1,GNG4,SDC2,NRAS,ACTR2,STAT3,LIMK1,SOS2,ACTR3,KRAS,PAK4
Cholesterol Biosynthesis I	1.02E00	5E-02	CYP51A1,SC5DL
Cholesterol Biosynthesis II (via 24,25-dihydrolanosterol)	1.02E00	5E-02	CYP51A1,SC5DL
Cholesterol Biosynthesis III (via Desmosterol)	1.02E00	5E-02	CYP51A1,SC5DL
VDR/RXR Activation	1.02E00	7.41E-02	NCOA3,MED1,FOXO1,CASR,VDR,IGFBP3
Role of Wnt/GSK-3β Signaling in the Pathogenesis of Influenza	1.02E00	7.41E-02	FZD6,NCOA3,APC,FZD3,CTNNB1,LEF1
Cyclins and Cell Cycle Regulation	9.98E-01	6.74E-02	HDAC2,HDAC1,E2F3,CCNB2,SKP1/SKP1P2,CDK1
Sertoli Cell-Sertoli Cell Junction Signaling	9.91E-01	5.64E-02	TGFBR3,ACTG2,MTMR2,MAP3K4,CTNNB1,TUBA1A,NRAS,PRKAR2B,KRAS,PTEN,PPAP2B
Glycolysis I	9.89E-01	6.67E-02	PKM,BPGM,ALDOC
Huntington's Disease Signaling	9.86E-01	5.49E-02	POLR2H,GOSR2,HDAC1,GNG4,HSPA14,SOS2,APAF1,HSPA2,CAPN7,CAPN3,HDAC2,HSPA4,TGM2
HGF Signaling	9.72E-01	6.67E-02	ELF1,MAP3K4,NRAS,STAT3,SOS2,KRAS,ELK3
DNA Double-Strand Break Repair by Homologous Recombination	9.66E-01	1.18E-01	POLA1,BRCA1
Phenylalanine Degradation IV (Mammalian, via Side Chain)	9.66E-01	5.13E-02	ALDH3A2,SLC27A3
Cholecystokinin/Gastrin-mediated Signaling	9.38E-01	6.6E-02	MAPK7,ROCK1,NRAS,MAP2K6,SOS2,IL37,KRAS
5-aminoimidazole Ribonucleotide Biosynthesis I	9.33E-01	5.56E-02	GART
Inosine-5'-phosphate Biosynthesis II	9.33E-01	6.25E-02	PAICS
Oxidized GTP and dGTP Detoxification	9.33E-01	9.09E-02	NUDT1
TNFR1 Signaling	9.15E-01	7.69E-02	APAF1,TNFAIP3,NFKB1,PAK4
Salvage Pathways of Pyrimidine Ribonucleotides	9.04E-01	5.88E-02	HIPK1,EIF2AK2,MAPK7,MAP2K6,LIMK1,CDK1
Neurotrophin/TRK Signaling	8.71E-01	6.67E-02	SPRY2,NRAS,MAP2K6,SOS2,KRAS
Pyrimidine Deoxyribonucleotides De Novo Biosynthesis I	8.69E-01	5.56E-02	DUT,DTYMK
Pancreatic Adenocarcinoma Signaling	8.44E-01	5.83E-02	BAD,E2F3,STAT3,KRAS,BIRC5,NFKB1,HMOX1
Phospholipase C Signaling	8.38E-01	5E-02	HDAC1,GNG4,PPP1CB,SOS2,NFKB1,HMOX1,RPS6KA3,PPP1R12A,HDAC2,NRAS,TGM2,KRAS,FCGR2A
PAK Signaling	8.35E-01	5.66E-02	NRAS,MYLK,LIMK1,SOS2,KRAS,PAK4
Renin-Angiotensin Signaling	8.29E-01	5.6E-02	NRAS,PRKAR2B,STAT3,SOS2,KRAS,NFKB1,PAK4
CD27 Signaling in Lymphocytes	8.21E-01	7.02E-02	APAF1,MAP3K4,MAP2K6,NFKB1
Heme Degradation	8.17E-01	9.09E-02	HMOX1
Phenylethylamine Degradation I	8.17E-01	9.09E-02	ALDH3A2
Geranylgeranyldiphosphate Biosynthesis	8.17E-01	1.25E-01	COX10
Renal Cell Carcinoma Signaling	8.14E-01	6.76E-02	FH,NRAS,SOS2,KRAS,PAK4
Basal Cell Carcinoma Signaling	8.14E-01	6.85E-02	FZD6,APC,FZD3,CTNNB1,LEF1
IL-9 Signaling	8.02E-01	7.5E-02	BCL3,STAT3,NFKB1
Inhibition of Angiogenesis by TSP1	8.02E-01	7.69E-02	THBS1,SDC2,CD47
IL-3 Signaling	7.96E-01	6.76E-02	BAD,FOXO1,NRAS,STAT3,KRAS
IL-1 Signaling	7.87E-01	5.66E-02	GNG4,IL1RAP,IL1R1,MAP2K6,PRKAR2B,NFKB1
Androgen Signaling	7.86E-01	4.9E-02	POLR2H,HSPA4,GTF2F1,GNG4,PRKAR2B,KAT2B,NFKB1
γ-linolenate Biosynthesis II (Animals)	7.86E-01	8E-02	SLC27A3,CYB5A
BMP signaling pathway	7.78E-01	6.25E-02	BMPR1A,NRAS,PRKAR2B,KRAS,NFKB1
Coagulation System	7.76E-01	7.89E-02	SERPINA1,F2R,PLAT
14-3-3-mediated Signaling	7.59E-01	5.98E-02	BAD,YWHAZ,FOXO1,TUBA1A,YWHAB,NRAS,KRAS
Lysine Degradation II	7.29E-01	5.26E-02	AASDHPPT
Lysine Degradation V	7.29E-01	3.57E-02	AASDHPPT
Salvage Pathways of Pyrimidine Deoxyribonucleotides	7.29E-01	5.88E-02	TK2
Rapoport-Luebering Glycolytic Shunt	7.29E-01	1E-01	BPGM
PKCθ Signaling in T Lymphocytes	7.2E-01	4.9E-02	MAP3K4,HLA-DQB1,CD4,NRAS,SOS2,KRAS,NFKB1
Gα12/13 Signaling	7.07E-01	5.56E-02	F2R,MAPK7,ROCK1,CTNNB1,NRAS,KRAS,NFKB1
Notch Signaling	7.03E-01	6.98E-02	JAG1,ADAM17,RBPJ
Glioma Invasiveness Signaling	7.01E-01	6.67E-02	F2R,NRAS,KRAS,CD44
Cdc42 Signaling	6.96E-01	5.08E-02	PPP1R12A,APC,HLA-DQB1,PPP1CB,ACTR2,MYLK,LIMK1,ACTR3,PAK4
PDGF Signaling	6.96E-01	5.88E-02	EIF2AK2,NRAS,STAT3,SOS2,KRAS
Hepatic Fibrosis / Hepatic Stellate Cell Activation	6.94E-01	5.48E-02	FAS,FN1,CCR5,IL1RAP,IL1R1,IL1RAPL1,NFKB1,IGFBP3
p70S6K Signaling	6.83E-01	5.43E-02	F2R,BAD,YWHAZ,YWHAB,NRAS,SOS2,KRAS
Clathrin-mediated Endocytosis Signaling	6.62E-01	5.1E-02	SERPINA1,F2R,MYO1E,ACTG2,TFRC,SH3BP4,ACTR2,STAM,ACTR3,TF
ILK Signaling	6.62E-01	5.21E-02	ACTG2,PPP1R12A,SNAI2,FN1,CTNNB1,MAP2K6,LEF1,NFKB1,PTEN,PPAP2B
Paxillin Signaling	6.6E-01	5.41E-02	ACTG2,VCL,NRAS,SOS2,KRAS,PAK4
Ceramide Biosynthesis	6.58E-01	6.25E-02	KDSR
Superoxide Radicals Degradation	6.58E-01	1.25E-01	SOD2
Zymosterol Biosynthesis	6.58E-01	4.55E-02	CYP51A1
ErbB4 Signaling	6.48E-01	5.97E-02	NRAS,ADAM17,SOS2,KRAS
IL-15 Signaling	6.32E-01	5.97E-02	NRAS,STAT3,KRAS,NFKB1
Cell Cycle: G1/S Checkpoint Regulation	6.32E-01	6.06E-02	HDAC2,HDAC1,E2F3,SKP1/SKP1P2
Calcium-induced T Lymphocyte Apoptosis	6.16E-01	5.71E-02	HDAC2,HDAC1,HLA-DQB1,CD4
CD40 Signaling	6E-01	5.71E-02	TNFAIP3,MAP2K6,STAT3,NFKB1
GM-CSF Signaling	6E-01	5.88E-02	NRAS,STAT3,SOS2,KRAS
Phosphatidylcholine Biosynthesis I	6E-01	5.88E-02	CHKB
Tumoricidal Function of Hepatic Natural Killer Cells	5.96E-01	8.33E-02	APAF1,FAS
Role of JAK1, JAK2 and TYK2 in Interferon Signaling	5.96E-01	7.41E-02	STAT3,NFKB1
Estrogen-mediated S-phase Entry	5.96E-01	7.14E-02	E2F3,CDK1
Retinoic acid Mediated Apoptosis Signaling	5.85E-01	5.8E-02	APAF1,PARP1,PARP2,ZC3HAV1
Axonal Guidance Signaling	5.76E-01	4.32E-02	NRP2,ROCK1,GNG4,TUBA1A,ACTR2,ADAM17,PRKAR2B,SOS2,ACTR3,EIF4E,SEMA3C,FZD6,FZD3,SDC2,NRAS,RTN4,LIMK1,KRAS,PAK4
RAR Activation	5.72E-01	4.76E-02	SMARCA4,PARP1,MED1,PRKAR2B,KAT2B,PML,NFKB1,PTEN,IGFBP3
Role of JAK family kinases in IL-6-type Cytokine Signaling	5.71E-01	7.41E-02	IL6ST,STAT3
Non-Small Cell Lung Cancer Signaling	5.7E-01	5.06E-02	BAD,NRAS,SOS2,KRAS
Hypoxia Signaling in the Cardiovascular System	5.7E-01	6.06E-02	SUMO1,UBE2B,PTEN,UBE2E1
fMLP Signaling in Neutrophils	5.64E-01	4.69E-02	GNG4,NRAS,ACTR2,ACTR3,KRAS,NFKB1
Role of IL-17F in Allergic Inflammatory Airway Diseases	5.62E-01	6.25E-02	RPS6KA2,NFKB1,RPS6KA3
Role of MAPK Signaling in the Pathogenesis of Influenza	5.56E-01	5.8E-02	PRDX6,NRAS,MAP2K6,KRAS
Tight Junction Signaling	5.52E-01	4.97E-02	ACTG2,RAB13,CTNNB1,VCL,PRKAR2B,MYLK,NFKB1,PTEN
Phosphatidylethanolamine Biosynthesis II	5.5E-01	5.56E-02	CHKB
Gluconeogenesis I	5.47E-01	4E-02	BPGM,ALDOC
G Beta Gamma Signaling	5.46E-01	4.31E-02	GNG4,NRAS,PRKAR2B,SOS2,KRAS
Graft-versus-Host Disease Signaling	5.45E-01	6E-02	FAS,HLA-DQB1,IL37
AMPK Signaling	5.42E-01	4.22E-02	SMARCA4,MLYCD,PPM1B,PRKAR2B,KAT2B,TAF9,AK2
Erythropoietin Signaling	5.42E-01	5.13E-02	NRAS,SOS2,KRAS,NFKB1
Gap Junction Signaling	5.34E-01	4.55E-02	ACTG2,MAPK7,CTNNB1,TUBA1A,NRAS,PRKAR2B,SOS2,KRAS
IL-15 Production	5.24E-01	6.45E-02	NFKB1,TWF1
CCR5 Signaling in Macrophages	5.15E-01	4.26E-02	FAS,CCR5,GNG4,CD4
T Helper Cell Differentiation	5.15E-01	5.56E-02	IL6ST,HLA-DQB1,STAT3,BCL6
NRF2-mediated Oxidative Stress Response	5.13E-01	4.69E-02	ACTG2,MAPK7,SOD2,DNAJB9,NRAS,MAP2K6,KRAS,HMOX1,MAF
Role of NFAT in Cardiac Hypertrophy	5.13E-01	4.35E-02	HDAC2,HDAC1,IL6ST,GNG4,NRAS,MAP2K6,PRKAR2B,SOS2,KRAS
Pathogenesis of Multiple Sclerosis	5.08E-01	1.11E-01	CCR5
Sucrose Degradation V (Mammalian)	5.08E-01	5E-02	ALDOC
Histidine Degradation III	5.08E-01	5.26E-02	MTHFD2
TNFR2 Signaling	5.03E-01	6.06E-02	TNFAIP3,NFKB1
Toll-like Receptor Signaling	4.96E-01	5.45E-02	EIF2AK2,MAP2K6,NFKB1
Signaling by Rho Family GTPases	4.89E-01	4.37E-02	SEPT4,ACTG2,PPP1R12A,ROCK1,GNG4,ACTR2,MYLK,LIMK1,ACTR3,NFKB1,PAK4
Hepatic Cholestasis	4.87E-01	4.02E-02	MAP3K4,IL1RAP,IL1R1,IL1RAPL1,PRKAR2B,IL37,NFKB1
Sonic Hedgehog Signaling	4.82E-01	6.06E-02	PRKAR2B,CDK1
Type II Diabetes Mellitus Signaling	4.82E-01	3.73E-02	SOCS7,PKM,SOCS6,SOCS5,SLC27A3,NFKB1
SAPK/JNK Signaling	4.78E-01	4.9E-02	MAP3K4,MAP4K3,NRAS,SOS2,KRAS
IL-17 Signaling	4.77E-01	5.41E-02	NRAS,MAP2K6,KRAS,NFKB1
Synaptic Long Term Potentiation	4.72E-01	4.72E-02	PPP1R10,PPP1R12A,PPP1CB,NRAS,PRKAR2B,KRAS
Calcium Transport I	4.7E-01	7.14E-02	ATP2C1
NAD Phosphorylation and Dephosphorylation	4.7E-01	5.88E-02	ACP5
Folate Transformations I	4.7E-01	3.03E-02	MTHFD2
Glioma Signaling	4.68E-01	4.46E-02	E2F3,NRAS,SOS2,KRAS,PTEN
Amyloid Processing	4.67E-01	5.36E-02	CAPN7,CAPN3,PRKAR2B
LPS-stimulated MAPK Signaling	4.65E-01	4.88E-02	NRAS,MAP2K6,KRAS,NFKB1
Ephrin B Signaling	4.65E-01	5E-02	ROCK1,GNG4,CTNNB1,LIMK1
Fatty Acid β-oxidation I	4.63E-01	4.44E-02	HADH,SLC27A3
IL-4 Signaling	4.54E-01	5.06E-02	HLA-DQB1,NRAS,SOS2,KRAS
Semaphorin Signaling in Neurons	4.53E-01	5.77E-02	ROCK1,LIMK1,PAK4
T Cell Receptor Signaling	4.48E-01	4.59E-02	CD4,NRAS,SOS2,KRAS,NFKB1
Thrombin Signaling	4.46E-01	4.39E-02	F2R,PPP1R12A,ROCK1,GNG4,PPP1CB,NRAS,MYLK,KRAS,NFKB1
Dopamine Receptor Signaling	4.42E-01	4.26E-02	PPP1R10,PPP1R12A,PPP1CB,PRKAR2B
IL-2 Signaling	4.39E-01	5.17E-02	NRAS,SOS2,KRAS
Glutaryl-CoA Degradation	4.37E-01	4.17E-02	HADH
VEGF Family Ligand-Receptor Interactions	4.31E-01	4.76E-02	NRP2,NRAS,SOS2,KRAS
B Cell Development	4.27E-01	6.06E-02	HLA-DQB1,IGLC1
Role of NFAT in Regulation of the Immune Response	4.16E-01	4.06E-02	GNG4,HLA-DQB1,CD4,NRAS,SOS2,KRAS,NFKB1,FCGR2A
Thrombopoietin Signaling	4.14E-01	4.76E-02	NRAS,STAT3,KRAS
Circadian Rhythm Signaling	4.11E-01	5.41E-02	BHLHE40,ARNTL
TWEAK Signaling	4.11E-01	5.26E-02	APAF1,NFKB1
Ethanol Degradation II	4.11E-01	4.65E-02	ALDH3A2,DHRS2
Ubiquinol-10 Biosynthesis (Eukaryotic)	4.08E-01	3.45E-02	COQ3
Glycogen Degradation III	4.08E-01	5.56E-02	MGAM
Ceramide Signaling	4E-01	4.55E-02	BAD,NRAS,KRAS,NFKB1
Regulation of IL-2 Expression in Activated and Anergic T Lymphocytes	4E-01	4.49E-02	NRAS,SOS2,KRAS,NFKB1
Assembly of RNA Polymerase III Complex	3.81E-01	6.25E-02	GTF3A
Fatty Acid Activation	3.81E-01	5.26E-02	SLC27A3
Choline Biosynthesis III	3.81E-01	4.55E-02	HMOX1
Oleate Biosynthesis II (Animals)	3.81E-01	5.26E-02	CYB5A
Histamine Degradation	3.81E-01	3.45E-02	ALDH3A2
Human Embryonic Stem Cell Pluripotency	3.8E-01	4E-02	FZD6,APC,FZD3,CTNNB1,BMPR1A,LEF1
Noradrenaline and Adrenaline Degradation	3.8E-01	3.85E-02	ALDH3A2,DHRS2
Nucleotide Excision Repair Pathway	3.8E-01	5.71E-02	POLR2H,RPA3
Death Receptor Signaling	3.78E-01	4.69E-02	APAF1,FAS,NFKB1
Induction of Apoptosis by HIV1	3.67E-01	4.62E-02	APAF1,FAS,NFKB1
iCOS-iCOSL Signaling in T Helper Cells	3.59E-01	4.07E-02	BAD,HLA-DQB1,CD4,NFKB1,PTEN
Cardiac β-adrenergic Signaling	3.58E-01	3.92E-02	PPP1R10,AKAP13,PPP1R12A,GNG4,PPP1CB,PRKAR2B
DNA Double-Strand Break Repair by Non-Homologous End Joining	3.57E-01	5.26E-02	PARP1
Chondroitin Sulfate Degradation (Metazoa)	3.57E-01	4.35E-02	CD44
Androgen Biosynthesis	3.57E-01	3.85E-02	SRD5A1
Urate Biosynthesis/Inosine 5'-phosphate Degradation	3.57E-01	4.35E-02	null
Fatty Acid α-oxidation	3.57E-01	4.76E-02	ALDH3A2
Antigen Presentation Pathway	3.51E-01	5E-02	PSMB9,MR1
Natural Killer Cell Signaling	3.44E-01	4.31E-02	NRAS,SOS2,KRAS,FCGR2A,PAK4
Protein Ubiquitination Pathway	3.38E-01	4.1E-02	HSPA2,HSPA4,USP11,PSMB9,DNAJB9,UBE2B,HSPA14,USP10,SKP1/SKP1P2,BRCA1,UBE2E1
Estrogen-Dependent Breast Cancer Signaling	3.35E-01	4.17E-02	NRAS,KRAS,NFKB1
Role of JAK1 and JAK3 in γc Cytokine Signaling	3.35E-01	4.48E-02	NRAS,STAT3,KRAS
α-Adrenergic Signaling	3.35E-01	3.85E-02	GNG4,NRAS,PRKAR2B,KRAS
Altered T Cell and B Cell Signaling in Rheumatoid Arthritis	3.35E-01	4.35E-02	FAS,HLA-DQB1,IL37,NFKB1
nNOS Signaling in Skeletal Muscle Cells	3.35E-01	3.23E-02	CAPN3
Dermatan Sulfate Degradation (Metazoa)	3.35E-01	4.35E-02	CD44
IL-8 Signaling	3.28E-01	3.92E-02	LASP1,ROCK1,GNG4,NRAS,LIMK1,KRAS,NFKB1,HMOX1
Antiproliferative Role of Somatostatin Receptor 2	3.26E-01	4.23E-02	GNG4,NRAS,KRAS
IL-17A Signaling in Airway Cells	3.26E-01	4.17E-02	STAT3,NFKB1,PTEN
Glutathione Redox Reactions I	3.15E-01	4.35E-02	PRDX6
Methylglyoxal Degradation III	3.15E-01	4.35E-02	AKR1B10
Oxidative Ethanol Degradation III	3.15E-01	2.5E-02	ALDH3A2
Virus Entry via Endocytic Pathways	3.11E-01	4.04E-02	ACTG2,TFRC,NRAS,KRAS
Leukocyte Extravasation Signaling	3.06E-01	4.06E-02	ACTG2,DLC1,MAP3K4,ROCK1,CTNNB1,VCL,ARHGAP35,CD44
Mitochondrial Dysfunction	3.05E-01	3.39E-02	NDUFB8,SOD2,COX4I1,COX10,CYB5A,UQCRFS1
FcγRIIB Signaling in B Lymphocytes	3.02E-01	3.39E-02	NRAS,KRAS
3-phosphoinositide Degradation	3.02E-01	3.7E-02	INPP4B,PTEN
RAN Signaling	2.97E-01	4.17E-02	CSE1L
Mitochondrial L-carnitine Shuttle Pathway	2.97E-01	4.55E-02	SLC27A3
Putrescine Degradation III	2.97E-01	3.33E-02	ALDH3A2
CD28 Signaling in T Helper Cells	2.94E-01	3.79E-02	HLA-DQB1,CD4,ACTR2,ACTR3,NFKB1
PXR/RXR Activation	2.89E-01	3.45E-02	ALDH3A2,FOXO1,PRKAR2B
GDNF Family Ligand-Receptor Interactions	2.81E-01	4.11E-02	NRAS,SOS2,KRAS
Cardiomyocyte Differentiation via BMP Receptors	2.8E-01	5E-02	BMPR1A
Tryptophan Degradation X (Mammalian, via Tryptamine)	2.8E-01	3.45E-02	ALDH3A2
Ethanol Degradation IV	2.8E-01	3.45E-02	ALDH3A2
P2Y Purigenic Receptor Signaling Pathway	2.75E-01	3.62E-02	GNG4,NRAS,PRKAR2B,KRAS,NFKB1
Role of Hypercytokinemia/hyperchemokinemia in the Pathogenesis of Influenza	2.7E-01	4.55E-02	CCR5,IL37
Melatonin Signaling	2.65E-01	3.85E-02	RORA,MAP2K6,PRKAR2B
Granzyme A Signaling	2.64E-01	5E-02	ANP32A
D-myo-inositol (1,3,4)-trisphosphate Biosynthesis	2.64E-01	4E-02	PTEN
Role of Oct4 in Mammalian Embryonic Stem Cell Pluripotency	2.6E-01	4.44E-02	PARP1,BRCA1
Small Cell Lung Cancer Signaling	2.57E-01	3.37E-02	APAF1,NFKB1,PTEN
EGF Signaling	2.51E-01	3.85E-02	STAT3,SOS2
Autoimmune Thyroid Disease Signaling	2.42E-01	3.28E-02	FAS,HLA-DQB1
nNOS Signaling in Neurons	2.42E-01	3.85E-02	CAPN7,CAPN3
Leptin Signaling in Obesity	2.36E-01	3.61E-02	FOXO1,PRKAR2B,STAT3
Ephrin A Signaling	2.33E-01	3.85E-02	ROCK1,LIMK1
NAD Salvage Pathway II	2.24E-01	3.23E-02	ACP5
Dopamine Degradation	2.12E-01	2.7E-02	ALDH3A2
D-myo-inositol (1,4,5,6)-Tetrakisphosphate Biosynthesis	2.12E-01	2.86E-02	PTEN
D-myo-inositol (3,4,5,6)-tetrakisphosphate Biosynthesis	2.12E-01	2.86E-02	PTEN
IL-22 Signaling	2.01E-01	4E-02	STAT3
TCA Cycle II (Eukaryotic)	2.01E-01	2.38E-02	FH

## Sheet: S2d
Table S1d. List of top networks associated with hPNPaseold-35 overexpression identified by IPA
Top Functions			Score	Focus Molecules	Molecules in Network
DNA Replication, Recombination, and Repair, Cellular Assembly and Organization, Cell Cycle			46	31	ANP32A,ATAD5,BAZ1B,BPGM,BRD4,CDC45,CHAF1A,DHRS12,DTYMK,E2F3,E2f,GAS2L1,GMNN,GTF3A,H3F3A/H3F3B,HIST1H2BJ/HIST1H2BK,HIST1H4A (includes others),HIST2H2BE (includes others),JMJD6,MCM2,MCM4,MCM5,MCM6,MCM7,Mcm,MELK,MFAP1,NEK3,OIP5,PRR11,Rb,RPA3,RSRC2,SSRP1,Vegf
Developmental Disorder, Gastrointestinal Disease, Hereditary Disorder			43	29	ALDOC,C4orf27,CAPN3,CAPN7,CENPJ,FAM46A,Filamin,FUCA1,glutathione peroxidase,HEATR2,KDM2A,MAGEA3/MAGEA6,MID1 (includes EG:100330952),MYO1E,NFkB (complex),NKIRAS2,PELI1,PELI2,peptidase,PPM1B,Presenilin,PRNP,RAB31,RIPK4,RNF13,RNF114,RPAP1,STAP2,TGOLN2,UBE2,UBE2B,UBE2E1,UQCRFS1,WDR61,ZFP64
Cancer, Drug Metabolism, Endocrine System Development and Function			43	29	APAF1,BIRC5,CDC37L1,CPE,creatine kinase,DNAJB9,ENSA,ERBB3,HJURP,Hsp70,Hsp90,HSP,HSPA2,HSPA4,HSPA14,ICT1 (includes EG:100149182),Insulin,ISCA1,LRIG1,METTL17,MKI67,MRPL19,MRPL17 (includes EG:171061),MRPS22,MTERFD1,PCCB,RFK,Sapk,SH3BP4,SLC25A12,SLC7A1,SRD5A1,ST13,STOML2,TFRC
Cell Cycle, Cellular Movement, Cancer			37	27	20s proteasome,AK2,Alpha tubulin,ASXL1,Beta Tubulin,CCT4,CEP76,Eotaxin,EPAS1,FH,Gamma tubulin,GART,Hdac,HILPDA,IFN TYPE 1,JRK,KIAA1199,MHC CLASS I (family),MRPL11 (includes EG:293666),MRPS31,NIF3L1,NRAS (includes EG:18176),OAS1,PAICS,PKM,PML,PSMB9,SCAF11,SRI,SSX2IP,STAT3,TTC19,TUBA1A,TUBGCP4,ZFYVE26
DNA Replication, Recombination, and Repair, Energy Production, Nucleic Acid Metabolism			37	27	ABCD3,ADAMTS1,AGAP1 (includes EG:100148154),ATPase,BCL6,CHD1L,DKK3,FDXR,Focal adhesion kinase,GBP1,HDAC2,Hdac1/2,HISTONE,IDH2,KATNA1,MBD3 (includes EG:17192),Mi2,NRP2,PARP2,PARP,PCSK6,PHF17,Pias,POGZ,RHOBTB3,SAP30 (includes EG:60406),SEMA3C,Sin3A,SLBP,SMARCA4,TAZ,TPM1 (includes EG:396366),WHSC1,ZMYND8,ZNF395
Cellular Compromise, DNA Replication, Recombination, and Repair, Cancer			36	26	ACTG2,APITD1,Basc,BLM,CENPE,CLASP2,DAZAP2,DDX11/DDX12P,FANCA,FANCC,GC-GCR dimer,HELZ,HTATSF1,JAG1,Jnk,LASP1,MAP4K3,MSH2,MSH6,NLRX1,Notch,PLSCR1,RBPJ,RFC1,Rfc,Rnr,RPA,RPL18,RPS27A,SKAP2,SMOOTH MUSCLE ACTIN,SMYD2,STRA13,SWI-SNF,ZNF512B
Cell Cycle, Cellular Assembly and Organization, DNA Replication, Recombination, and Repair			36	26	ANKZF1,APC (complex),ARID1A,ARNTL,AURKB,BARD1,BRCA1-BARD1,BRCC3,CCNB2,Cdc2,CDC16,CDC5L,CDK1,CENPF,CHD7,CRNKL1,Ctbp,Cyclin A,Cyclin B,CYP51A1,DARS,Histone H1,HMGA2,IFI6,KIF20A,LONP2,MAP4,MSH3 (includes EG:100537314),NCAPH,NUP107,Pka,Pka catalytic subunit,RAB13,SC5DL,SF3B1
Hereditary Disorder, Neurological Disease, Skeletal and Muscular Disorders			34	25	AKR1B10,CIB1,ELF1,ELK3,ERK1/2,ETS,GALNT1,Ifn,IL6ST,JAK,KIDINS220,MIA,MMD,MPZL1,MTMR2,MTUS1,NEFL,S100B,SAR1A,SAR1B,Sec23,SEC23A,SEC23B,Smad2/3,SOCS5,SOCS6,SOCS7,SOCS,STAM,STAT,Stat1/3,TMED7,TRIM2,TSH,VGF
Cell Cycle, DNA Replication, Recombination, and Repair, Cellular Compromise			34	25	ATM/ATR,ATP2C1,CHEK2,chemokine receptor,COBLL1,DDX3X,DNA-directed DNA polymerase,DOM3Z,EXOSC7,EXOSC8,FUBP3,GINS2,H2AF,H2AFY,Igf,JUN/JUNB/JUND,LRP8,Mapk,MT1H,Neurotrophin,PAPD7,PLK2,POLA1,POLD3,POLH,PRIM1,QKI,RAD51C,REV3L,RFC5,SOS2,Sos,SPRY2,VAV,ZC3HAV1
Gene Expression, Protein Synthesis, Molecular Transport			30	24	CAPZA1,CCNG2,CNOT8,CPN1,DLC1,Eif2,EIF3,EIF5,eIF,EIF1AX,EIF2C1,EIF2S2,EIF3A,EIF3M,EIF4A,EIF4B,EIF4E,EIF4F,EIF4G1,Eif4g,ILF3,IMPDH2,MIRLET7,MTHFD2,NUP37,NUP160,NUP133 (includes EG:234865),p70 S6k,PAIP1,PI3K (complex),Ribosomal 40s subunit,RPS6KA2,RPS6KA,SART3,TNS3
Cancer, Connective Tissue Disorders, Skeletal and Muscular Disorders			29	23	Ap1,APC,APOBEC3B,AVIL,C16orf53,Calcineurin protein(s),CaMKII,CBLL1,CD44,Ck2,CUL4A,estrogen receptor,FBL,GTPBP1,HDAC1,Histone h3,IFN Beta,IL12 (complex),KIF1C,KLHDC10,KRAS,LDL,MBNL1,NMDA Receptor,NR4A3,PNN,PPFIBP1,PTEN,RAB20,RAD21,RNA polymerase II,RNGTT,Serine Protease,SYNRG,YWHAZ
Cellular Movement, Organismal Development, Cell-To-Cell Signaling and Interaction			28	22	ACVR1,ADAM17,ARHGAP35,BANP,BMPR1A,BTG3,CD47,DDR1,DUSP3,Ecm,ERK,growth factor receptor,Ikk (family),Integrin,Integrin alpha 5 beta 1,JINK1/2,LAMB1,Laminin,Lfa-1,MAP3K4,MAP3K,MCAM,MKK3/6,MVP,Oas,PAQR3,PPAP2B,RANBP9,SNAI2,Talin,TGFBR3,TM4SF1,TNS1,VCL,ZFP36L1
Organismal Injury and Abnormalities, Renal Damage, Renal and Urological Disease			28	23	ADCY,ADM,AKAP13,ALDH3A2,Alpha catenin,Cg,Creb,CTNNB1,CXXC1,Dynamin,FERMT1,FSH,GMPR,hemoglobin,IER3,Immunoglobulin,Interferon alpha,KIAA1109,LGMN,PDLIM5,PLEKHO2,POP5 (includes EG:117109),Ppp2c,PRPF4,PRPF40A,SMCHD1,snRNP,SNRPD1,STAT5a/b,SUMO1,TF,TGM2 (includes EG:21817),TLK1,ZC3H11A,ZMAT3
Cell Death and Survival, Cell Cycle, DNA Replication, Recombination, and Repair			28	23	26s Proteasome,ABHD10,Actin,Ahr-aryl hydrocarbon-Arnt,AMPK,APPBP2,BRCA1,caspase,CELF2,CHMP5,EIF2AK2,FAS,H2AFX,HIST1H2BD,IgG1,IgG2a,Igm,MLYCD,MSRB2,Na+,K+ -ATPase,P-TEFb,P2RX4 (includes EG:18438),P4HA2,PALB2,PARP1,PHACTR1,PP2A,PRDX6,PRKAA,RPS27L,SIRT1,SLC7A11,SOD2,TFAP2C,TMEM131
Cell Cycle, Cell-To-Cell Signaling and Interaction, Cellular Growth and Proliferation			26	21	ACTL6A,Ampa Receptor,ATXN7,BCL3,BCL2L11,CLCN3,Collagen type III,COX10,CYB5A,Cytochrome c,cytochrome-c oxidase,Dynein,FAM162A,Gcn5l,Histone h4,IFN alpha/beta,INO80D,MED1 (includes EG:19014),MED13L,mediator,MMS19,MUT,NPTN,NUMA1,NuRD,P38 MAPK,PLP1 (includes EG:18823),PTMA,SEPT4,SMC3,SNX1,TH2 Cytokine,TIP60,TRAP/Media,TRRAP
Vitamin and Mineral Metabolism, Cellular Development, Cellular Growth and Proliferation			26	21	ARAP1,BRCC3,BTF3,BTN3A1,C15orf39,C16orf80,CCNK,CDK13,CDK18,CENPN,CEP76,CLDND1,EVPL,GTF2F1,HTATSF1,IFT52,IFT88,KAZN,MAPK1IP1L,MOCOS,OPA1,PARL,POLR2H,PREPL,PSD3,RDBP,RFC5,ROGDI,RPLP1,SH3BGRL,SLC43A3,TAF6L,TCEA2,UBC,UBE2T
Organismal Development, Skeletal and Muscular System Development and Function, Tissue Morphology			24	20	Alp,BIK,Caspase 3/7,Collagen type I,COX4I1,DAAM1,Dishevelled,DKK1,Fascin,Frizzled,GPIIB-IIIA,Groucho,GUSB,Hat,HPSE,LEF1,LRP10,LRP,MTF2 (includes EG:17765),Pdgf Ab,PITPNA,Pkc(s),SDC2,Secretase gamma,SETX,SFRP1,SLC17A6,SLC7A5,STC1,TBX3,TCF/LEF,THBS1,TMPRSS6,Wnt,ZNF384
Cellular Development, Nervous System Development and Function, Immunological Disease			24	20	ACTR2,ACTR3,Adaptor protein 1,Alpha actin,AP1S2,Arp2/3,BCR (complex),CPNE3,G-Actin,HLA-DQB1,Iga,Ikb,IL-1R,IL1R1,IL1RAP,IL1RAPL1,KIAA0430,LAMP1,MBP,Mhc class ii,MHC Class II (complex),MR1,NCKAP1,NIP7,PDZRN3,Ptk,RAP2C,Ras homolog,RNF128,RTN4 (includes EG:57142),SPG21,TCR,Tgf beta,Tnf receptor,TWF1 (includes EG:19230)
Cell Morphology, Reproductive System Development and Function, Carbohydrate Metabolism			24	22	Akt,B4GALT5,CADM1,CLK2,Cofilin,Collagen Alpha1,Collagen Type VI,CREG1,DSTN,EPB41L3,Foxo,GEM,INPP4B,Limk,MBIP,Mlc,Mlcp,Myosin,NDUFAF3,PDK1,PHIP,PP1 protein complex group,PP1-C,PP1/PP2A,PPP1CB,PPP1R2,PPP1R10,PPP1R12A,PRKAR2B,ROCK1,Rock,RRBP1,SPC25 (includes EG:100144563),SSH1 (includes EG:231637),ZWINT
Gene Expression, Renal Damage, Renal Tubule Injury			24	20	Calmodulin,CAMKK2,Cbp/p300,DKC1,DR1,GOT,GTF2F1,HADH,HFE,Holo RNA polymerase II,HOXB2,IGFBP3,KAT2B,LYPLA2,N-cor,NCOA3,Pde,PEPCK,POLR2H,Proinsulin,Rar,Rxr,SLC25A11,Smad,SSR1,TAF5,TAF9,TDG,TFIIA,thymidine kinase,thyroid hormone receptor,TK2,VDR,VitaminD3-VDR-RXR,ZEB2
Cell Morphology, Skeletal and Muscular System Development and Function, Gastrointestinal Disease			24	20	BORA,CDKN1C,CK1,Cyclin D,Cyclin E,FBXL7,FBXO9,FBXO21,FOXO1,GABARAPL1,Growth hormone,Gsk3,HDL,HMG CoA synthase,I kappa b kinase,IL23,IL37,INSIG2,KLHL22,NFKB1,NSFL1C,PI3K (family),Pro-inflammatory Cytokine,RAD23A,SAA,Scf,Scf Trcp beta,SERPINA1,SKP1/SKP1P2,SMC6,SPAG9,TXNIP,Ubiquitin,UBXN7,WDR11
Post-Translational Modification, Cell Death and Survival, Nervous System Development and Function			23	20	14-3-3,alcohol group acceptor phosphotransferase,BAD,BNIP3,CBY1,CCL18,CDK5RAP3,Cpla2,ENaC,Fc gamma receptor,Fcer1,FCGR2A,Gm-csf,HIPK1,HIST1H2BH/HIST1H2BO,Hsp27,KLF5,LIMK1,MAP2K1/2,MAPK7,MHC Class I (complex),MYLK (includes EG:107589),NFkB (family),PAK4,Pak,PREB,Raf,Ras,RPS6KA3,Rsk,SERPINE2,TTF1,WNK1,YES1,YWHAB
Organismal Injury and Abnormalities, Lipid Metabolism, Small Molecule Biochemistry			21	19	ADAM11,AQP8,B3GALNT1,C2orf29,calpain,CCL18,cholesterol,CLPS,CMTM6,CPM,CYP2F1,DEXI,Gm4794/Sult3a1,HRASLS,IL1,KCNK1,Mir122a,b,NCAPH,NOVA1,NRXN3,NSDHL,P2RX4 (includes EG:18438),PARM1,PF4,PLEKHB2,PNLIP,progesterone,RAB23,RBM3,RORA,SLC5A4,SNRK,TMEM97,TP53 (includes EG:22059),ZAP70
RNA Post-Transcriptional Modification, Organ Morphology, Renal Dilation			21	18	APOBEC3G,APOO,ARMC9,BZW1,C12orf4,C5orf15,DCUN1D4,DHRS2,DICER1,EMC3,GAPVD1,LMBRD1,MICB,miR-10a-5p (and other miRNAs w/seed ACCCUGU),MYO19,MYSM1,NAPSA,ODZ2,PELI2,PKD1,POGZ,QPCT,RNF24,SEC63 (includes EG:11231),SLC35F5,ST5,TARBP2,TM4SF1,TMEM223,TMEM248,TNS1,UBC,VAV2,ZNF550,ZNF711
Cellular Assembly and Organization, Cellular Function and Maintenance, Cell Morphology			19	17	ABHD6,Acot1,ACOT13,BCLAF1,BLZF1,BOLA1,C6orf108,CALU,CDC42EP3,CKS2,COQ3,CTSA,DGKD,DLST,EXOSC2,FYCO1,GGCX,GSPT1,HNF4A,LAPTM4A,LIPC,MIS12,MON1B,PAAF1,PRR14,PSMD7,PSMD8,PSMD10,RAB2A,THRAP3,TPX2,UMPS,USO1,VAMP5,ZNF410
